# Supplementary material for: Scleroderma Patient-centered Intervention Network—Scleroderma Support group Leader EDucation (SPIN-SSLED) program: non-randomised feasibility trial
Source: PubMed Central journal article supplement — BMJ Open. 2019 Nov 11;9(11):e029935. doi: 10.1136/bmjopen-2019-029935 (PMC6858260; doi:10.1136/bmjopen-2019-029935), 2019-11-11
Supplement: bmjopen-2019-029935.draft_revisions.pdf [file bmjopen-2019-029935.draft_revisions.pdf]

# BMJ Open

BMJ Open is committed to open peer review. As part of this commitment we make the peer review history of every article we publish publicly available.

When an article is published we post the peer reviewers' comments and the authors' responses online. We also post the versions of the paper that were used during peer review. These are the versions that the peer review comments apply to.

The versions of the paper that follow are the versions that were submitted during the peer review process. They are not the versions of record or the final published versions. They should not be cited or distributed as the published version of this manuscript.

BMJ Open is an open access journal and the full, final, typeset and author-corrected version of record of the manuscript is available on our site with no access controls, subscription charges or pay-per-view fees (<http://bmjopen.bmj.com>).

If you have any questions on BMJ Open's open peer review process please email [info.bmjopen@bmj.com](mailto:info.bmjopen@bmj.com)

# BMJ Open

## The Scleroderma Patient-centered Intervention Network – Support group Leader Education (SPIN-SSLED) Program: Non-randomised Feasibility Trial

|                               |                                                                                                                                                                                                                                                                                                                                                                                                                                                                                                                                                                                                                                                                                                                                                                                                                                                                                                                                                                                                                                                                                                                   |
|-------------------------------|-------------------------------------------------------------------------------------------------------------------------------------------------------------------------------------------------------------------------------------------------------------------------------------------------------------------------------------------------------------------------------------------------------------------------------------------------------------------------------------------------------------------------------------------------------------------------------------------------------------------------------------------------------------------------------------------------------------------------------------------------------------------------------------------------------------------------------------------------------------------------------------------------------------------------------------------------------------------------------------------------------------------------------------------------------------------------------------------------------------------|
| Journal:                      | <i>BMJ Open</i>                                                                                                                                                                                                                                                                                                                                                                                                                                                                                                                                                                                                                                                                                                                                                                                                                                                                                                                                                                                                                                                                                                   |
| Manuscript ID                 | bmjopen-2019-029935                                                                                                                                                                                                                                                                                                                                                                                                                                                                                                                                                                                                                                                                                                                                                                                                                                                                                                                                                                                                                                                                                               |
| Article Type:                 | Research                                                                                                                                                                                                                                                                                                                                                                                                                                                                                                                                                                                                                                                                                                                                                                                                                                                                                                                                                                                                                                                                                                          |
| Date Submitted by the Author: | 20-Feb-2019                                                                                                                                                                                                                                                                                                                                                                                                                                                                                                                                                                                                                                                                                                                                                                                                                                                                                                                                                                                                                                                                                                       |
| Complete List of Authors:     | <p>Thombs, Brett; McGill University, Psychiatry<br/> Dyas, Laura; Scleroderma Foundation, Michigan Chapter<br/> Pépin, Mia; Lady Davis Institute for Medical Research, Psychiatry<br/> Aguila, Kylene; Lady Davis Institute for Medical Research, Psychiatry<br/> Carrier, Marie-Eve; Jewish General Hospital, Lady Davis Institute for Medical Research<br/> Tao, Lydia; Lady Davis Institute for Medical Research, Psychiatry<br/> Harb, Sami; Lady Davis Institute for Medical Research, Psychiatry<br/> Malcarne, Vanessa; San Diego State University, Psychology; San Diego State University/University of California, San Diego Joint Doctoral Program in Clinical Psychology<br/> El-Baalbaki, Ghassan; Université du Québec à Montréal, Psychology<br/> Peláez, Sandra; Lady Davis Institute for Medical Research, Psychiatry<br/> Sauve, Maureen; Scleroderma Canada, Scleroderma Society of Ontario<br/> Hudson, Marie; Jewish General Hospital, Lady Davis Institute for Medical Research<br/> Platt, Robert; McGill University, Biostatistics<br/> Patient Advisory Team, SPIN-SSLED; SPIN, SSLED</p> |
| Keywords:                     | patient education, peer support, feasibility trial, scleroderma, systemic sclerosis, support groups                                                                                                                                                                                                                                                                                                                                                                                                                                                                                                                                                                                                                                                                                                                                                                                                                                                                                                                                                                                                               |
|                               |                                                                                                                                                                                                                                                                                                                                                                                                                                                                                                                                                                                                                                                                                                                                                                                                                                                                                                                                                                                                                                                                                                                   |

SCHOLARONE™  
Manuscripts

## The Scleroderma Patient-centered Intervention Network – Scleroderma Support group

### Leader Education (SPIN-SSLED) Program: Non-randomised Feasibility Trial

Brett D. Thombs,<sup>1-7</sup> Laura Dyas,<sup>8</sup> Mia Pépin,<sup>1</sup> Kylene Aguila,<sup>1</sup> Marie-Eve Carrier,<sup>1</sup> Lydia Tao,<sup>1</sup>

Sami Harb,<sup>1</sup> Vanessa L. Malcarne,<sup>9,10</sup> Ghassan El-Baalbaki,<sup>11</sup> Sandra Peláez,<sup>1,6</sup> Maureen Sauvé,<sup>12</sup>

Marie Hudson,<sup>1,4</sup> Robert W. Platt,<sup>1,3</sup> SPIN-SSLED Patient Advisory Team.<sup>13</sup>

<sup>1</sup>Lady Davis Institute for Medical Research, Jewish General Hospital, Montreal, Quebec, Canada;

<sup>2</sup>Department of Psychiatry, McGill University, Montreal, Quebec, Canada;

<sup>3</sup>Department of Epidemiology, Biostatistics, and Occupational Health, McGill University, Montreal, Quebec, Canada;

<sup>4</sup>Department of Medicine, McGill University, Montreal, Quebec, Canada;

<sup>5</sup>Department of Psychology, McGill University, Montreal, Quebec, Canada;

<sup>6</sup>Department of Educational and Counselling Psychology, McGill University, Montreal, Quebec, Canada;

<sup>7</sup>Biomedical Ethics Unit, McGill University, Montreal, Quebec, Canada;

<sup>8</sup>Scleroderma Foundation Michigan Chapter, Southfield, Michigan, USA;

<sup>9</sup>Department of Psychology, San Diego State University, California, USA;

<sup>10</sup>San Diego Joint Doctoral Program in Clinical Psychology, San Diego State University/University of California, California, USA;

1  
2  
3 <sup>11</sup>Department of Psychology, Université du Québec à Montréal, Montreal, Quebec, Canada;  
4  
5

6 <sup>12</sup>Scleroderma Society of Ontario and Scleroderma Canada, Hamilton, Ontario, Canada;  
7

8 <sup>13</sup>SPIN-SSLED Patient Advisory Team Members: Kerri Connolly, Director of Programs and Services  
9  
10 of the Scleroderma Foundation, Danvers, Massachusetts, USA; Stephen Elrod, Southern California  
11  
12 Patient Group, Los Angeles, California, USA; Catherine Fortuné, Ottawa Scleroderma Support Group,  
13  
14 Ottawa, Ontario, Canada; Karen Gottesman, Director of Pharma & Biotech Engagement Scleroderma  
15  
16 Foundation, Los Angeles, California, USA; Karen Nielsen, Scleroderma Society of Ontario, Hamilton,  
17  
18 Ontario, Canada; Geneviève Guillot, Sclérodermie Québec, Longueuil, Quebec, Canada; Ken Rozee,  
19  
20 Scleroderma Society of Nova Scotia, Halifax, Nova Scotia, Canada; Amy Gietzen, Scleroderma  
21  
22 Foundation, Danvers, Massachusetts, USA; Michelle Richard, President of Scleroderma Canada,  
23  
24 Halifax, Nova Scotia, Canada; Nancy Stephens, Michigan Patient Group, Detroit, Michigan, USA.  
25  
26  
27  
28  
29  
30  
31

32 **Address for Correspondence:**  
33

34 Brett D. Thombs, PhD; Jewish General Hospital; 4333 Côte Ste Catherine Road; Montreal,  
35  
36 Quebec H3T 1E4; Telephone (514) 340-8222 ext. 25112; E-mail: brett.thombs@mcgill.ca.  
37  
38  
39  
40  
41

42 **Word Count:** 4,066  
43  
44  
45  
46  
47  
48  
49  
50  
51  
52  
53  
54  
55  
56  
57  
58  
59  
60

## ABSTRACT

**Objectives:** The Scleroderma Patient-centered Intervention Network – Scleroderma Support group Leader EDucation (SPIN-SSLED) Program was designed to improve confidence and self-efficacy and to reduce burden for support group leaders. Objectives of the feasibility trial were to (1) evaluate feasibility of program delivery, including required resources, management issues, and scientific aspects; and (2) assess user satisfaction and identify any modifications needed to improve program content or delivery based on participant feedback.

**Design:** Non-randomised feasibility trial.

**Setting:** North American scleroderma patient organisations.

**Participants:** Current support group leaders or potential new leaders referred by patient organisations.

**Intervention:** The program included 13 modules delivered live via videoconference over 3 months (April to July 2018) in 60- to 90-minute sessions.

**Outcome Measures:** (1) Elements of feasibility, including enrolment and consent procedures, percentage of referred group leaders who consented to participate, session attendance, and technical support requirements; (2) program usability, understandability, organisation, and clarity; (3) leader satisfaction with the program; and (4) planned trial outcome measures, including support group leader self-efficacy, burnout, emotional distress, and physical function.

**Results:** All 12 referred potential participants consented to enrol, and 10 were included in 2 training groups of 5 participants each. Participants attended 95% of sessions. Required technical support was minimal, and videoconferencing technology functioned well. Overall

1  
2  
3 program satisfaction rating was 9.4/10. Mean item rating on the 8 items of the Client  
4  
5  
6 Satisfaction Questionnaire-8 was 3.83 (1 = low satisfaction; 4 = high satisfaction). Pre-post  
7  
8  
9 scores on the Scleroderma Support Group Leader Self-efficacy Scale increased by 1.7  
10  
11 standard deviations (large effect); scores on burnout, emotional distress, and physical  
12  
13  
14 function improved by 0.44, 0.38, and 0.45 standard deviations (moderate effects).  
15

16 **Conclusion:** The SPIN-SSLED Program was feasibly delivered, including management,  
17  
18 resource, and scientific aspects. Participant satisfaction was high. The program is ready to be  
19  
20  
21 tested in a full-scale randomised controlled trial.  
22  
23

24 **Funding Source:** Canadian Initiative for Outcomes in Rheumatology cAre  
25  
26

27 **Trial Registration:** NCT03508661  
28  
29

30 **Key Words:** patient education; peer support; feasibility trial; scleroderma; support groups;  
31  
32 systemic sclerosis  
33  
34  
35  
36  
37  
38  
39  
40  
41  
42  
43  
44  
45  
46  
47  
48  
49  
50  
51  
52  
53  
54  
55  
56  
57  
58  
59  
60

### STRENGTHS AND LIMITATIONS OF THIS STUDY

- This is the first trial to test the feasibility of delivering an education and training program via videoconference to peer support group leaders.
- The education and training program was developed in a partnership that included scleroderma peer support group leaders, patient organisation leaders, and researchers and health care professionals.
- Trial outcomes included elements of feasibility (e.g., management, resources, scientific aspects); program usability, understandability, organisation, and clarity; leader satisfaction with the program; and planned trial outcome measures.
- This was a non-randomised feasibility trial that only included 10 participants in 2 training groups and did not include a control group; generalisability of results outside of scleroderma is not known.

## INTRODUCTION

People with rare diseases face the same challenges as those with more common diseases plus unique challenges, including limited disease education and lack of specialised support options.[1-12] Professionally organised support services for common diseases are often available through the healthcare system,[13, 14] but are not typically available in rare diseases.[10, 15] As a result, some people with rare diseases rely on peer-led support groups for disease-specific education and support.[16-20] Support group activities typically involve an educational or information-sharing component and the exchange of emotional and practical support.[14, 18-22].

Systemic sclerosis (SSc), or scleroderma, is a rare chronic, autoimmune connective tissue disease characterised by abnormal fibrotic processes and excessive collagen production.[23-25] Support groups, most led by people with SSc, play an important role for many people with the disease.[17, 26-30] Many people with SSc, however, cannot access support groups because they are not available close to where they live, and many initiated support groups are not sustained due to challenges that could be addressed via leader training.[18, 19]

A systematic review of randomised controlled trials (RCTs) that evaluated the effects of training programs for patient leaders of illness-based support groups on the competency, self-efficacy, burden, and emotional well-being of group leaders identified only one RCT that met inclusion criteria.[31] That trial [32] evaluated confidence and self-efficacy of cancer



1  
2  
3 support group leaders randomised to either 4-month long high-resource (N = 29; website,  
4  
5 discussion forum, 2-day face-to-face training) or low-resource (N = 23; website, discussion  
6  
7 forum) interventions. The RCT did not find evidence that the high-resource program was  
8  
9 more effective. However, the trial was substantially underpowered, not enough information  
10  
11 was provided to determine intervention content or how it was delivered, and the risk of bias  
12  
13 was high due to methodological limitations.  
14  
15  
16  
17  
18

19 The Scleroderma Patient-centered Intervention Network (SPIN) partnered with SS  
20  
21 patients and patient organisations to develop the Scleroderma Support group Leader  
22  
23 EDucation (SPIN-SSLED) Program. The program is a 13-session group videoconference  
24  
25 training program, designed to improve skills and self-efficacy, reduce burnout, and improve  
26  
27 emotional and physical function among support group leaders. The objectives of the SPIN-  
28  
29 SSLED feasibility trial were to (1) evaluate the feasibility of steps needed to take place in a planned  
30  
31 full-scale trial, including the *required resources* (e.g., staffing, time, and budget), *management issues*  
32  
33 (e.g., related to optimising performance of personnel and data systems), and *scientific aspects* (e.g.,  
34  
35 recruitment rates of eligible leaders, acceptability of intervention to leaders, assessing performance of  
36  
37 outcome measures) and (2) identify any modifications needed to improve the content or delivery of the  
38  
39 SPIN-SSLED Program based on participant feedback.  
40  
41  
42  
43  
44  
45

## 46 **METHODS**

47  
48 The SPIN-SSLED feasibility trial was a non-randomised study. It was registered prior to  
49  
50 enrolling participants (NCT03508661) and, although not a randomised study, is reported based  
51  
52 on items from the CONSORT extension for randomised pilot and feasibility trials.[33] There  
53  
54  
55  
56  
57  
58  
59

1  
2  
3 were no changes to the feasibility trial protocol and no changes to planned outcomes after  
4  
5  
6 commencement of the trial.  
7

## 8 **Participants**

9  
10 Eligible participants for the SPIN-SSLED feasibility trial were current SSc support group  
11  
12 leaders or were identified by Scleroderma Canada or the Scleroderma Foundation (United States) as a  
13  
14 new leader who will initiate a new support group, were able to use the internet to access and  
15  
16 participate in training sessions and to complete study questionnaires online, were available to  
17  
18 participate at times when sessions were scheduled, and were English-speaking, since both groups in  
19  
20 the feasibility trial were conducted in English. The full-scale trial will include groups conducted in  
21  
22 French, but individuals who participated in the feasibility study will be excluded from the full-scale  
23  
24 RCT. Thus, to ensure that there will be an adequate number of French-speaking participants in the full-  
25  
26 scale RCT, only English-speaking leaders were included in the feasibility study.  
27  
28  
29  
30

## 31 **Procedures**

32  
33 For the purpose of testing the feasibility of administering the SPIN-SSLED Program, we sought  
34  
35 10 group leaders to participate in two separate training groups of 5 participants each. We asked  
36  
37 Scleroderma Canada and the Scleroderma Foundation to generate an initial list of 12 interested  
38  
39 potential participants and obtained permission for the SPIN team to send them an email with an  
40  
41 invitation to participate in the feasibility trial and a copy of the consent form. Following the initial  
42  
43 email, SPIN personnel contacted potential participants by phone within 48 hours to describe the study,  
44  
45 assess their eligibility, review the consent form, and answer questions they may have had about the  
46  
47 study. Eligible leaders who verbally agreed to enrol in the study received a second email with the  
48  
49 consent form again attached, and they were able to consent via email by replying, *“I have read the*  
50  
51 *consent form and understand the terms of the feasibility study. I agree to participate in the study*  
52  
53  
54  
55  
56  
57  
58  
59  
60

1  
2  
3 *testing the feasibility of the SPIN-SSLED Program.*” The first 10 people to respond and consent were  
4  
5 enrolled, and the other 2 were put on a waiting list. All leaders who consented to participate and  
6  
7 enrolled received an email invitation including a clickable link to the online data management platform  
8  
9 where they were asked to complete baseline study measures. The email also included the date of their  
10  
11 first training session, the topic of the first session and information on how to login to the  
12  
13 videoconferencing system, as well as a link to the SPIN-SSLED online forum platform, where the  
14  
15 program manual and associated PowerPoint slides were available. Ongoing email and phone technical  
16  
17 support was available to help leaders with the consent process, access to the data management platform  
18  
19 to complete study measures, and training sessions.  
20  
21  
22  
23

24 The trial was approved by the ethics committee of the Centre intégré universitaire de santé et de  
25  
26 services sociaux du Centre-Ouest-de-l'Île-de-Montréal.  
27  
28

### 29 **Intervention**

30  
31 The SPIN-SSLED Program was developed by a team of researchers and health care  
32  
33 professionals with expertise in SSc, patient organisation representatives and a Support Group Advisory  
34  
35 Team comprised of people with SSc who are current SSc support group leaders. The program content  
36  
37 and design were based on results of our preliminary research on support groups in SSc, including  
38  
39 individual interviews and surveys with leaders, members, and non-attenders,[17-20] and informed by  
40  
41 instructional material for support group leaders in other diseases that we identified via the internet and  
42  
43 by consultations with support group leaders. The program uses a problem-based learning approach.  
44  
45 Problem-based learning is a learner-centred approach that integrates theory and practice by providing  
46  
47 the necessary knowledge and skills, presenting a complex, real-world problem, then working to  
48  
49 identify an approach to solving the problem.[34-37] To implement this, each module introduces a topic  
50  
51  
52  
53  
54  
55  
56  
57  
58  
59  
60

1  
2  
3 and provides an overview of key information. Then, there is a guided discussion among training group  
4  
5 participants about possible approaches and solutions to problems.  
6

7  
8 The SPIN-SSLED Program included 13 modules that are delivered live via videoconference  
9  
10 over the course of 3 months. Each module is delivered in a 60- to 90-minute session. Module topics  
11  
12 include (1) the leader's role; (2) starting a support group; (3) structuring a support group meeting; (4)  
13  
14 scleroderma 101; (5) successful support group culture; (6) managing support group dynamics I; (7)  
15  
16 managing support group dynamics II; (8) grief and crisis in scleroderma; (9) marketing and  
17  
18 recruitment; (10) the continuity of the group; (11) supporting yourself as a leader; (12) virtual support  
19  
20 group meetings, and (13) support group leader resources. The program includes 11 filmed vignettes  
21  
22 that demonstrate effective group facilitation techniques and ways to respond to problems that arise  
23  
24 with the behaviours of specific group members or group interactions. In addition to the live modules,  
25  
26 SPIN-SSLED participants receive a program manual that summarises didactic material that is provided  
27  
28 in the sessions.  
29  
30  
31  
32

33  
34 Based on our previous experience with videoconferencing and consistent with previous trials of  
35  
36 videoconference training, 5 group leaders were assigned to each training group to maximise effective  
37  
38 interaction and participation.[38-41] Training sessions were delivered using the GoToMeeting®  
39  
40 videoconferencing platform, a high-performance platform that has been used successfully for similar  
41  
42 applications.[42-44] In addition to the videoconference sessions, participants had access to a secure,  
43  
44 monitored SPIN-SSLED online forum via the Slack® communication tool to interact with other  
45  
46 participants about program content. The two training groups were held in the evening.  
47  
48

### 49 **Feasibility Outcomes**

50  
51  
52 Outcomes related to process and resources were assessed throughout the duration of the  
53  
54 feasibility trial, and leader feedback was obtained upon completion of the program. The collected  
55  
56  
57  
58  
59  
60

1  
2  
3 measures of feasibility included assessments of the (1) enrolment and consent procedure, (2)  
4 percentage of referred and eligible group leaders who consented to participate, (3) personnel  
5 requirements to assist participants with accessing the GoToMeeting® videoconferencing platform for  
6 sessions and the online survey program Qualtrics® for online data collection pre-training and post-  
7 training, (4) technological performance of the videoconferencing system, and (5) any challenges for  
8 study personnel.  
9  
10  
11  
12  
13  
14  
15

16  
17 Individual semi-structured interviews were conducted with all participants via telephone upon  
18 completion of the 13 modules. The semi-structured interviews were guided by items of the Patient  
19 Education Materials Assessment Tool for Audiovisual Materials (PEMAT) [45] and addressed topics  
20 related to usability, understandability, organisation, and clarity of the SPIN-SSLED program,  
21 including its videoconference-based delivery. The PEMAT included a single rating of satisfaction  
22 from 0 (worst possible) to 10 (best possible).  
23  
24  
25  
26  
27  
28  
29  
30

### 31 **SPIN-SSLED Planned Trial Outcome Measures**

32  
33 In the planned full-scale RCT, we will evaluate whether the SPIN-SSLED Program is effective  
34 in improving SSc support group leaders' self-efficacy for carrying out their leader role (primary) and if  
35 the program reduces burnout, improves emotional well-being, and improves physical function among  
36 support group leaders (secondary). The SPIN-SSLED feasibility trial was not intended to test  
37 hypotheses and did not have adequate power for this, but we collected trial outcome measures at the  
38 time of consent to participate in the trial and following completion of the program to evaluate the  
39 percentage of measures that were completed and to evaluate performance of the measures. Participants  
40 were emailed invitations to complete baseline and post-intervention measures using the online survey  
41 program Qualtrics®.  
42  
43  
44  
45  
46  
47  
48  
49  
50  
51  
52  
53  
54  
55  
56  
57  
58  
59  
60

1  
2  
3 **Leader Self-Efficacy:** The Scleroderma Support Group Leader Self-efficacy Scale (SSGLSS)  
4  
5 [46] was developed by our research team, including the members of the SPIN Support Group Advisory  
6  
7 Team, to measure support group leader self-efficacy for performing leader tasks. Initial items were  
8  
9 obtained from the Group Leader Self-Efficacy Instrument, a 37-item self-report questionnaire  
10  
11 that assesses self-efficacy for performing group leader skills.[47] The Group Leader Self-  
12  
13 Efficacy Instrument is intended for use with group psychotherapy leaders, so many of its  
14  
15 items are not relevant or appropriate for support group leaders. Items from this instrument  
16  
17 were reviewed for relevancy, and relevant items were considered for inclusion, along with  
18  
19 items from a questionnaire intended for leaders of cancer and multiple sclerosis support  
20  
21 groups [48] and items that we generated from the results of a published study on the  
22  
23 experiences of leaders of cancer support groups.[49] All items were then reviewed by members  
24  
25 of our research team to remove items that were repetitive or not relevant for SSc and to generate new  
26  
27 items to reflect important SSc-specific content based on their own experiences or on qualitative  
28  
29 interviews that we conducted with SSc support group leaders (N = 10). Items were then reviewed  
30  
31 iteratively by all members of the research team until a consensus was reached on included items. The  
32  
33 resulting 32-item scale is scored on a 6-point Likert scale from 1 (strongly disagree) to 6 (strongly  
34  
35 agree) with possible total scores from 32 to 192 and higher scores indicating greater self-efficacy. The  
36  
37 SSGLSS was validated in two samples of SSc support group leaders (N = 102, N = 55) and found to  
38  
39 have good internal consistency (Cronbach's alpha 0.96 and 0.95) and hypothesis-consistent convergent  
40  
41 validity with the Oldenburg Burnout Inventory (OLBI).  
42  
43  
44  
45  
46  
47  
48  
49  
50  
51

52  
53 **Burnout:** Leader burnout was assessed with the OLBI,[50-52] which is a 16-item  
54  
55 measure that assesses exhaustion and disengagement due to burnout. The OLBI was initially  
56  
57  
58  
59  
60

1  
2  
3 designed for work-related burnout, but has been adapted for numerous settings and in  
4  
5 multiple countries and languages.[52] Our research team revised the wording of each OLBI  
6  
7 item to reflect the support group environment rather than a work environment (e.g., "I find  
8  
9 my work to be a positive challenge" was revised to "I find my role as a support group leader  
10  
11 to be a positive challenge"). The OLBI has a two-factor structure (exhaustion and  
12  
13 disengagement) with good measurement properties.[50-52] Items are scored on a 4-point  
14  
15 scale; higher scores indicate higher levels of exhaustion and disengagement. Internal  
16  
17 consistency reliability (Cronbach's alpha) in patients with SSc was 0.84 for exhaustion and 0.80  
18  
19 for disengagement.[46]

20  
21  
22 **Emotional Distress:** The Patient Health Questionnaire-8 (PHQ-8) was used to assess  
23  
24 emotional distress.[53] The PHQ-8 items measure depressive symptoms over the last 2 weeks  
25  
26 on a 4-point scale, ranging from 0 (not at all) to 3 (nearly every day) with higher scores  
27  
28 indicating more depressive symptoms. The PHQ-8 performs equivalently to the PHQ-9,[53]  
29  
30 which has been shown to be a valid measure of depressive symptoms in patients with  
31  
32 SSc.[54]

33  
34  
35 **Physical Function:** Physical function was measured using the Physical Function subscale of  
36  
37 the 29-item Patient Reported Outcomes Measurement Information System (PROMIS-29) version 2.0.  
38  
39 The PROMIS-29 measures 8 domains of health status with 4 items for each of 7 domains (physical  
40  
41 function, anxiety, depression, fatigue, sleep disturbance, social roles and activities, pain interference)  
42  
43 plus a single item for pain intensity. Items are scored on a 5-point scale (range 1-5), with different  
44  
45 response options for different domains, and the single pain intensity item is measured on an 11-point  
46  
47  
48  
49  
50  
51  
52  
53  
54  
55  
56  
57  
58  
59  
60

1  
2  
3 rating scale. Higher scores represent more of the domain being measured; that is, better physical  
4  
5 function. Total raw scores are obtained by summing item scores for each domain. The PROMIS-29  
6  
7 version 2.0 has been validated in SSc.[55]  
8  
9

10 **Participant Satisfaction**: Satisfaction with the SPIN-SSLED Program was evaluated with the  
11  
12 Client Satisfaction Questionnaire-8 (CSQ-8),[56] a standardised survey that is used to assess  
13  
14 satisfaction with health services. Items are scored on a Likert scale from 1 (low satisfaction) to 4 (high  
15  
16 satisfaction) with total scores ranging from 8 to 32. The CSQ-8 has been widely validated across a  
17  
18 range of populations and health services programs.[57]  
19  
20

21 **Adverse Events**: Following each session, we emailed participants and requested that they report  
22  
23 any concerns that they had about the sessions or their experience in the sessions.  
24  
25

## 26 **Sample size**

27  
28 Guidance on appropriate sample size for feasibility trials varies substantially in the published  
29  
30 literature. For the purposes of establishing feasibility of delivery of the SPIN-SSLED Program, we  
31  
32 determined that conducting two different training groups would allow us to evaluate intervention  
33  
34 content and delivery aspects, and, thus, we sought to recruit a total of 10 participants to conduct two  
35  
36 training groups.  
37  
38

## 39 **Data Analysis**

40  
41  
42 Feasibility outcomes included leader eligibility and recruitment, leader enrolment, and  
43  
44 technological performance of the videoconferencing system. Qualitative information via interviews  
45  
46 and weekly reports by participants was collected to inform any necessary changes to the program or  
47  
48 trial methods that could be implemented prior to beginning a full-scale trial. Descriptive statistics were  
49  
50 used to provide means and standard deviations for SPIN-SSLED Program outcome measures.  
51  
52  
53  
54  
55  
56  
57  
58  
59  
60



1  
2  
3 Hypothesis tests were not conducted, but effect sizes for pre-post differences are shown. Data were  
4  
5 analysed using the statistics software program, IBM SPSS.  
6

## 7 **Patient and Public Involvement**

8  
9  
10 The SPIN Support Group Advisory Team has been involved in all stages of SPIN's  
11  
12 research on support groups in SSc, including preliminary research on support groups in SSc,  
13  
14 the development of the SPIN-SSLED program, and the design and implementation of the  
15  
16 feasibility trial. Members of the Team initially participated in the design of the Scleroderma  
17  
18 Support Group Survey, which informed developing of the program by collecting information  
19  
20 on the experiences and training needs of SSc support group leaders, priorities of SSc support  
21  
22 group members, and reasons why people do not attend SSc support groups.[17-20] Team  
23  
24 members participated in the development of the SSGLSS,[46] which was administered in the  
25  
26 feasibility trial and will be the primary outcome for the planned full-scale trial. Team members  
27  
28 provided input into the development of the SPIN-SSLED Program and its modules, filmed the  
29  
30 vignettes used in the program, and were involved in decisions related to the conduct of the feasibility  
31  
32 trial.  
33  
34  
35  
36  
37  
38  
39

## 40 **RESULTS**

### 41 **Participant Characteristics**

42  
43 The trial was conducted between April and July 2018. Scleroderma Canada and the  
44  
45 Scleroderma Foundation each provided our team with names of 6 potential participants. All agreed to  
46  
47 participate in the program. We initially enrolled 10 participants, but one was hospitalised prior to  
48  
49 initiating the program. Thus, prior to starting the trial, we added one participant who had been wait-  
50  
51 listed.  
52  
53  
54  
55  
56  
57  
58  
59  
60

All 10 participants were female. The mean age was 58 years (standard deviation [SD] = 11 years). There were 6 participants from Canada and 4 from the United States. All 10 described themselves as White, and one also described herself as Aboriginal. Of the 10 participants, 9 were people with SSc. Mean years since diagnosis among those with SSc was 11 years. Participant characteristics are shown in Table 1.

**Table 1. Participant Characteristics**

| Characteristics                               | N Participants<br>= 10 |
|-----------------------------------------------|------------------------|
| Female sex, <i>n</i> (%)                      | 10 (100%)              |
| Age in years, <i>mean</i> ( <i>SD</i> )       | 57.7 (11.1)            |
| Country, <i>n</i> (%)                         |                        |
| Canada <sup>a</sup>                           | 6 (60%)                |
| United States <sup>b</sup>                    | 4 (40%)                |
| Race/ethnicity, <sup>c</sup> <i>n</i> (%)     |                        |
| White                                         | 10 (100%)              |
| Aboriginal                                    | 1 (10%)                |
| Relationship status, <i>n</i> (%)             |                        |
| Married or living as married                  | 8 (80%)                |
| Separated or divorced                         | 2 (20%)                |
| Education in years, <i>mean</i> ( <i>SD</i> ) | 17.5 (2.7)             |
| Occupational status, <i>n</i> (%)             |                        |
| Homemaker                                     | 1 (10%)                |
| Part- or full-time employment <sup>b</sup>    | 2 (20%)                |
| Disability                                    | 3 (30%)                |

|                                                                |            |
|----------------------------------------------------------------|------------|
| Retired                                                        | 4 (40%)    |
| SSc diagnosis, <i>n</i> (%)                                    |            |
| Limited SSc                                                    | 4 (40%)    |
| Diffuse SSc                                                    | 5 (50%)    |
| Not diagnosed with SSc                                         | 1 (10%)    |
| Years since SSc diagnosis, <i>mean</i> ( <i>SD</i> )           | 10.9 (7.4) |
| Current leader of SSc support group                            | 10 (100%)  |
| Years as a SSc support group leader, <i>mean</i> ( <i>SD</i> ) | 3.6 (3.7)  |

<sup>a</sup> Participants from British Columbia, Manitoba, Ontario, Quebec (2), and Saskatchewan.

<sup>b</sup> Participants from California (3) and Florida.

<sup>c</sup> Participants could select more than one race/ethnicity.

## Feasibility Outcomes

All 10 participants completed all baseline and post-trial measures, including the PEMAT interview. Participant attendance at the weekly sessions was high (95%; 123 of 130 sessions). No sessions were missed or delayed due to technological difficulties, and time for technological support from our team was between 1-2 hours for the entire program. Per the PEMAT interviews and per our observations, the GoToMeeting system worked fluidly and supported the training groups well.

A summary of responses to the PEMAT interviews is shown in Table 2. As can be seen in the table, there were relatively minor suggestions for improving the program. Overall, feedback was extremely positive. The overall mean grade given by participants for the SPIN-SSLED Program was 9.4/10. No concerns related to adverse events were reported.

## Table 2. Summary of Responses to the Patient Education Materials Assessment Tool for Audiovisual Materials (PEMAT) Interviews

| PEMAT Item                                                                                                                               | Summary of Responses                                                                                                                |
|------------------------------------------------------------------------------------------------------------------------------------------|-------------------------------------------------------------------------------------------------------------------------------------|
| Are you currently a leader of a support group, a co-leader or planning on becoming a support group leader?                               | 4 co-leaders, 5 leaders, 1 plans to become leader.                                                                                  |
| <b>PROCESS</b>                                                                                                                           |                                                                                                                                     |
| Did you find that the weekly frequency of the training sessions was adequate?                                                            | 10 yes.                                                                                                                             |
| Did you find the length of each training session appropriate?                                                                            | 10 yes; 3 added that grief module was not long enough, 1 said grief module was too long.                                            |
| Was it difficult to find the motivation to attend the training session every week?                                                       | 9 no; 1 sometimes due to scheduling.                                                                                                |
| <b>PURPOSE</b>                                                                                                                           |                                                                                                                                     |
| Did you understand the objectives of the SPIN-SSLED training program modules?                                                            | 10 yes.                                                                                                                             |
| Did you find the information provided in the SPIN-SSLED training program relevant?                                                       | 10 yes.                                                                                                                             |
| <b>WORDS AND LANGUAGE</b>                                                                                                                |                                                                                                                                     |
| Did you find that the content of the program manual was clear, concise and easy to follow?                                               | 10 yes.                                                                                                                             |
| Did you find that the content delivered in the training sessions and the discussion about the content was easy to understand and useful? | 10 yes.                                                                                                                             |
| <b>CONTENT AND ORGANISATION</b>                                                                                                          |                                                                                                                                     |
| Did you find that the content of the SPIN-SSLED modules was presented logically and well-organised?                                      | 10 yes.                                                                                                                             |
| Did you find that the order of the modules was logical and that linkages were clear?                                                     | 9 yes; 1 said that order was “staggered”.                                                                                           |
| Did you find the discussion among other participants helpful?                                                                            | 10 yes; 1 mentioned that sometimes she had questions and challenges specific to herself that she didn’t have time to get addressed. |
| <b>VIDEO VIGNETTES</b>                                                                                                                   |                                                                                                                                     |
| Did the fact that the video vignettes scenarios were performed by scleroderma patients make the program more relatable?                  | 9 yes; 1 had difficulty hearing the videos (participant with hearing impairment).                                                   |
| Were you able to clearly understand the people speaking in the videos?                                                                   | 9 yes; 2 no; 1 indicated there were small things they didn't quite hear (participant with hearing impairment).                      |

1  
2  
3 Did you develop an understanding of the challenges that could arise in a support group from watching the videos and obtain useful information or strategies to address them? 8 yes, 2 no (not hearing properly; 1 participant with hearing impairment).  
4  
5  
6  
7

---

## TECHNOLOGY

---

11 Did you use a computer, phone, tablet or all these devices to access the SPIN-SSLED Training Program? 7 used computer, 4 used phone, 1 used tablet (> 10 due to >1 method for some participants).  
12  
13

14 Did the initial invitation email provide you with the information you needed to understand how to log in for the training session? 10 yes.  
15  
16  
17

19 Did you experience any technical difficulties while using GoToMeeting? 8 no; 2 minor.  
20  
21

22 Did you experience any technical difficulties while using Slack chatroom? 7 no; 3 did not use it. Use overall was minimal.  
23

24 Did you use the guide we provided to use GoToMeeting and the Slack chatroom? 5 yes; 5 no.  
25  
26

---

## OVERALL APPRECIATION

---

29 Can you please tell us about your experience with the SPIN-SSLED Training Program, including things that you liked about the program and things that could be improved? Positive aspects of program: informative, organised, videos, “Supporting Yourself as a Leader” and “Grief and Crisis” modules were identified as very important. Positive aspects of SPIN-SLLED program leader: clear, conscientious, answered questions thoroughly, gave opportunities for feedback, was available between sessions. To improve: discuss financial support for support group expenses, expand grief module over 2 sessions, do sessions in winter instead of summer so that individuals with scleroderma can only enjoy the outdoors in summer, adding more videos.  
30  
31  
32  
33  
34  
35  
36  
37  
38  
39  
40

41 What grade (on a 0-10 scale, 0 being the worst and 10 being the best possible score) would you give the program? 5 rated 10, 1 rated 9, 1 rated 9.5, 2 rated 8, 1 rated "9 or 10".  
42  
43  
44  
45 0 (worst) to 10 (best).  
46  
47  
48  
49

47 Would you recommend this program to someone with scleroderma? 10 yes.  
48  
49

50 Is there anything you want to give us feedback about that was not included in this interview? The remote support group meetings module was less important to 1 participant. Suggestion to make recordings of support group discussions available online.  
51  
52  
53

---

### SPIN-SSLED Planned Trial Outcome Measures

Table 3 shows the responses to each of the 32 items of the SSGLSS, which will be the primary outcome measure in the full-scale trial. Pre-training, the mean (SD) was 124.4 (22.0), which was similar to the scores of our two international samples from the SSGLSS validation study (N = 102, mean SSGLSS = 122.9 (21.7); N = 55, mean SSGLSS = 123.9 (19.4)). Post-training, the mean total score increased to 159.2 (17.1). The standardised mean difference effect size was 1.70, which is considered a large effect size. SSGLSS items are scored on a 1-6 scale, and the average item score increase pre-post training was 1.1 points.

**Table 3. Pre- and Post- Intervention Item and Total Scores for the Scleroderma Support Group Leader Self-efficacy Scale:**

Possible item scores range from 1 to 6 with higher scores reflecting greater self-efficacy

| Items                                                                                                                 | Pre-Trial N | Pre-Trial Mean (SD) | Post-Trial N | Post-Trial Mean (SD) | Standardised Mean Difference Effect Size (95% confidence interval – total only) |
|-----------------------------------------------------------------------------------------------------------------------|-------------|---------------------|--------------|----------------------|---------------------------------------------------------------------------------|
| 1. Obtain financial or other resources needed to run the group                                                        | 10          | 3.5 (1.7)           | 10           | 4.8 (1.2)            | 0.61                                                                            |
| 2. Promote the group to health professionals as an important resource for patients                                    | 10          | 4.5 (0.7)           | 10           | 5.4 (0.7)            | 1.80                                                                            |
| 3. Share responsibilities, including administrative and practical tasks, with a co-facilitator or other group members | 10          | 4.8 (1.6)           | 10           | 5.5 (0.5)            | 0.52                                                                            |
| 4. Manage group members who are overly talkative or monopolize the discussion                                         | 10          | 3.9 (1.1)           | 10           | 4.8 (0.6)            | 1.13                                                                            |
| 5. Manage group members who assume the role of the "know-it-all"                                                      | 10          | 3.9 (1.1)           | 10           | 4.6 (0.8)            | 0.73                                                                            |
| 6. Support members of the group who are grieving                                                                      | 10          | 3.3 (1.5)           | 10           | 4.7 (0.8)            | 0.97                                                                            |
| 7. Help overly shy group members feel comfortable interacting with the group                                          | 10          | 3.9 (1.1)           | 10           | 4.9 (0.7)            | 1.14                                                                            |
| 8. Help group members cope with difficult events, such as the death of a member                                       | 10          | 3.0 (1.8)           | 10           | 4.7 (0.8)            | 0.90                                                                            |
| 9. Effectively recruit new members                                                                                    | 10          | 3.5 (1.4)           | 10           | 4.9 (0.7)            | 1.18                                                                            |
| 10. Address the different needs of groups members at varying stages of the disease                                    | 10          | 3.7 (1.6)           | 10           | 4.8 (0.6)            | 0.77                                                                            |
| 11. Manage conflicts and disagreements between group members                                                          | 10          | 3.3 (1.4)           | 10           | 4.5 (0.7)            | 0.95                                                                            |
| 12. Help the group establish appropriate group rules, such as maintaining confidentiality                             | 10          | 4.3 (1.1)           | 10           | 5.8 (0.4)            | 2.31                                                                            |
| 13. Effectively publicize the group                                                                                   | 10          | 3.5 (1.1)           | 10           | 5.1 (0.7)            | 1.86                                                                            |
| 14. Intervene effectively when group rules are not being followed                                                     | 10          | 4.0 (1.1)           | 10           | 5.0 (0.7)            | 1.30                                                                            |
| 15. Obtain the support I need to cope with the emotional demands of leading the group                                 | 10          | 2.9 (1.2)           | 10           | 4.9 (1.0)            | 1.65                                                                            |
| 16. Respond constructively to feedback from group members                                                             | 10          | 4.6 (0.8)           | 10           | 5.3 (0.8)            | 1.01                                                                            |
| 17. Help group members relate to other members of a different age                                                     | 10          | 4.1 (1.0)           | 10           | 5.1 (0.7)            | 1.30                                                                            |
| 18. Provide the structure needed for successful meetings                                                              | 10          | 5 (0.9)             | 10           | 5.6 (0.5)            | 1.03                                                                            |
| 19. Keep the group meetings interesting and relevant to both new and returning members                                | 10          | 4.2 (0.9)           | 10           | 5.2 (0.8)            | 1.35                                                                            |

|                                                                                                 |    |              |    |              |                   |
|-------------------------------------------------------------------------------------------------|----|--------------|----|--------------|-------------------|
| 20. Manage group members who oversimplify or minimize the concerns of other members             | 10 | 3.5 (1.4)    | 10 | 4.9 (0.9)    | 0.99              |
| 21. Facilitate the group meetings so that all members have an opportunity to speak              | 10 | 4.6 (0.8)    | 10 | 5.1 (0.9)    | 0.68              |
| 22. Help the group stay focused on topics that are relevant to members                          | 10 | 4.4 (0.7)    | 10 | 5.3 (0.7)    | 1.88              |
| 23. Obtain feedback from members about the group                                                | 10 | 4.3 (0.8)    | 10 | 5.0 (0.8)    | 1.04              |
| 24. Organise and plan activities for group members, such as having guest speakers               | 10 | 4.5 (1.4)    | 10 | 5.5 (0.7)    | 0.86              |
| 25. Help members feel comfortable in the group and relate to one another                        | 10 | 4.4 (0.8)    | 10 | 5.2 (0.6)    | 1.43              |
| 26. Obtain feedback from members about my leadership                                            | 10 | 3.6 (0.7)    | 10 | 4.8 (0.9)    | 1.79              |
| 27. Help group members relate to other members of a different cultural background               | 10 | 3.9 (1.2)    | 10 | 4.5 (1.0)    | 0.50              |
| 28. Communicate reasonable boundaries about my availability outside of the group                | 10 | 3.7 (1.3)    | 10 | 4.5 (1.0)    | 0.64              |
| 29. Talk to a group member about her or his behaviour if it is disruptive to the group          | 10 | 2.7 (1.3)    | 10 | 4.5 (0.9)    | 1.58              |
| 30. Ask a member to leave the group due to her or his disruptive behaviour                      | 10 | 1.6 (1.0)    | 10 | 4.2 (1.1)    | 2.32              |
| 31. Help group members relate to other members of a different gender                            | 10 | 4.4 (1.1)    | 10 | 5.0 (0.8)    | 0.65              |
| 32. Recruit a co-facilitator or other group members to help me with leadership responsibilities | 10 | 4.9 (1.3)    | 10 | 5.1 (0.9)    | 0.16              |
| <b>Total Score (Possible Range 32 to 192)</b>                                                   | 10 | 124.4 (22.0) | 10 | 159.2 (17.0) | 1.70 (0.67, 2.72) |



Table 4 shows results for health outcomes, including burnout (OLBI), emotional distress (PHQ-8), and physical function (PROMIS-29). For all of these outcomes, the standardised mean difference effect size of post-trial score improvement was between 0.38 and 0.45, which are typically considered moderate effect sizes.

**Table 4. Pre- and Post- Intervention Total Scores for Secondary Outcome Measures**

| Measure                                                                            | Pre-Trial N | Pre-Trial Mean (SD) | Post-Trial N | Post-Trial Mean (SD) | Standardised Mean Difference Effect Size (95% confidence interval) |
|------------------------------------------------------------------------------------|-------------|---------------------|--------------|----------------------|--------------------------------------------------------------------|
| Oldenburg Burnout Inventory<br>(higher scores = greater burnout)                   | 10          | 33.2 (4.6)          | 10           | 31.0 (4.9)           | 0.44 (-0.44, 1.33)                                                 |
| Patient Health Questionnaire-8<br>(higher scores = greater symptoms of depression) | 10          | 10.8 (2.7)          | 10           | 9.8 (2.4)            | 0.38 (-0.50, 1.27)                                                 |
| PROMIS-29 Physical Function<br>(higher raw scores = greater function)              | 10          | 17.1 (2.2)          | 10           | 18.2 (2.4)           | 0.45 (-0.42, 1.36)                                                 |

As shown in Table 5, the mean post-training score on the CSQ-8 was 30.6 (2.2). On a per item basis, the mean item score (possible range 1-4) was 3.8, reflecting a very high level of satisfaction with the experience of trainees with the SPIN-SSLED Program.

**Table 5. Post-Intervention Items, Frequencies, and Total Scores for the Client Satisfaction Questionnaire-8: Item response options very across items, but all scored 1-4**

| Items                                                         | 1 Point (Dissatisfied) n (%) | 2 Points (Mildly Satisfied) n (%) | 3 Points (Mostly Satisfied) n (%) | 4 Points (Quite Satisfied) n (%) | Item Mean (SD) |
|---------------------------------------------------------------|------------------------------|-----------------------------------|-----------------------------------|----------------------------------|----------------|
| 1. How would you rate the quality of the SPIN-SSLED training? | 0 (0%)                       | 0 (0%)                            | 1 (10%)                           | 9 (90%)                          | 3.9 (0.3)      |

|                                                                                                         |        |        |         |           |           |
|---------------------------------------------------------------------------------------------------------|--------|--------|---------|-----------|-----------|
| 2. Did the SPIN-SSLED program provide you the kind of training you wanted?                              | 0 (0%) | 0 (0%) | 2 (20%) | 8 (80%)   | 3.8 (0.4) |
| 3. To what extent has the SPIN-SSLED training met your needs?                                           | 0 (0%) | 0 (0%) | 4 (40%) | 6 (60%)   | 3.6 (0.5) |
| 4. If a friend were in need of similar training, would you recommend the SPIN-SSLED program to him/her? | 0 (0%) | 0 (0%) | 2 (20%) | 8 (80%)   | 3.8 (0.4) |
| 5. How satisfied are you with the amount of training you received from the SPIN-SSLED program?          | 0 (0%) | 0 (0%) | 2 (20%) | 8 (80%)   | 3.8 (0.4) |
| 6. Has the SPIN-SSLED training helped you to deal more effectively with your support group leader role? | 0 (0%) | 0 (0%) | 0 (10%) | 10 (100%) | 4.0 (0.0) |
| 7. In an overall, general sense, how satisfied are you with the SPIN-SSLED training?                    | 0 (0%) | 0 (0%) | 1 (20%) | 9 (90%)   | 3.9 (0.3) |
| 8. If you were to seek help again, would you come back to the SPIN-SSLED training?                      | 0 (0%) | 0 (0%) | 2 (20%) | 8 (80%)   | 3.8 (0.4) |

---

**Total Score**  
**(Possible Range 8 to 32)** 30.6 (2.2)

---

## DISCUSSION

Feasibility of delivering the SPIN-SSLED Program in the context of a trial, participant satisfaction, and program content were evaluated in the SPIN-SSLED feasibility trial. Results

1  
2  
3 informed revisions to the content of the program and provided confidence that the program can be  
4 effectively and efficiently delivered in a full-scale trial.  
5  
6

7  
8 With respect to overall experience with the program and program content, participants reported  
9 that the content was clear and well-organised. Overall satisfaction with their experience in the SPIN-  
10 SSLED Program was rated as 9.4 out of 10 on average. Participant satisfaction was similarly high  
11 when evaluated with the 8 items of the CSQ. Several participants encouraged the research team to  
12 expand on the single module related to grief. Based on comments and follow-up discussions with  
13 participants, the program was revised to include two modules on grief, including one module on grief  
14 and loss that leaders have experienced because they or somebody close to them has been diagnosed  
15 with SSc and a second module on providing support to group members who are struggling with grief  
16 and loss. In order to add a second module on grief and loss, the two modules on managing group  
17 dynamics were reduced to a single module. To facilitate this, rather than viewing all of the short video  
18 vignettes included in those modules as part of the training sessions, participants suggested that they  
19 could view the vignettes prior to the sessions and then suggest specific modules for review and  
20 discussion in the training sessions.  
21  
22  
23  
24  
25  
26  
27  
28  
29  
30  
31  
32  
33  
34  
35  
36

37  
38 With respect to program delivery, participants indicated that they were able to access the  
39 sessions via the GoToMeeting platform and did not experience any technical difficulties that  
40 interrupted their training sessions. One difficulty that was reported involved a participant with a  
41 hearing impairment who was unable to hear all of the vignette videos well. This information will help  
42 us to assess for reasons why participants may need additional support in the full-scale trial and will  
43 allow us to make accommodations. From a management standpoint, total time for technical support  
44 due to access difficulties across the trial period for the two groups was between 1-2 hours. Participants  
45  
46  
47  
48  
49  
50  
51  
52  
53  
54  
55  
56  
57  
58  
59  
60

1  
2  
3 attended 95% of sessions, and all 10 participants completed all baseline and post-trial outcome  
4  
5 assessments.  
6

7  
8         There were limitations that should be considered in evaluating the results of the SPIN-SSLED  
9  
10 feasibility trial. First, we were provided with a small list of potential participants from our patient  
11  
12 organisation partners, and it is possible that these support group leaders were more motivated or  
13  
14 otherwise more likely to participate and engage than the leaders who will participate in the full-scale  
15  
16 trial. Second, we did not randomise participants to the intervention and to a wait-list control group as  
17  
18 we will do in the planned full-scale trial. Third, we only conducted 2 training groups and only included  
19  
20 a total of 10 participants. The reason for not using a control group and limiting the feasibility trial to 2  
21  
22 groups is that there is a finite number of English- and French-speaking SSc support group leaders, and  
23  
24 we wanted to be able to assess feasibility aspects but maximize the number of participants eligible for  
25  
26 the full-scale trial. It is possible that the pre-selection of potential participants and the lack of the  
27  
28 possibility of randomised assignment to a non-intervention group may have resulted in over-estimation  
29  
30 of the percentage of participants who will enrol in the full-scale trial and the degree to which they will  
31  
32 actively participate. Given the small number of French-speaking leaders available for the full-scale  
33  
34 trial, we did not include a French group in the feasibility trial. However, all measures have been used  
35  
36 successfully previously with French-speaking research participants. Finally, the trial only included  
37  
38 leaders of SSc support groups, and this may limit generalisability to other patient populations, but it  
39  
40 will be useful to inform our planned full-scale trial of the SPIN-SSLED Program.  
41  
42  
43  
44  
45

46  
47         There are no existing training programs for SSc support group leaders, and a systematic review  
48  
49 did not identify any training or education programs that have been demonstrated to be effective for  
50  
51 support group leaders in any medical condition.[31] The planned full-scale SPIN-SSLED trial, which  
52  
53 was recently funded by the Canadian Institutes of Health Research, is scheduled to begin in 2019  
54  
55  
56  
57  
58  
59  
60

1  
2  
3 (http://webapps.cihr-irsc.gc.ca/decisions/p/project\_details.html?applId=388187&lang=en). It will be a  
4  
5 pragmatic RCT that will test whether providing the SPIN-SSLED Program to leaders of SSc support  
6  
7 groups will improve outcomes compared to leaders assigned to a wait-list control. Pragmatic RCTs  
8  
9 differ from explanatory or mechanistic trials in that they are intended to test the effectiveness of adding  
10  
11 an intervention to routine practice in order to inform practice and policy decisions rather than explain  
12  
13 intervention mechanisms.[58, 59] SSc support group leaders who are enrolled will be randomly  
14  
15 allocated to the training program or a wait-list control, and those allocated to training will be clustered  
16  
17 in training groups where they will interact with each other. To account for clustering in the training  
18  
19 arm, but not the control arm, we will use a partially nested RCT trial design (PN-RCT).[60-62] The  
20  
21 PN-RCT design is a hybrid between a conventional RCT, in which individual participants are  
22  
23 randomised, and a cluster RCT, in which pre-existing clusters (e.g., primary care practices,  
24  
25 classrooms) are randomised to intervention or control arms. In the PN-RCT design, analyses account  
26  
27 for dependence within intervention arm clusters, but treat leaders assigned to the control arm  
28  
29 individually, as in a conventional RCT. Participants will be existing support group leaders or new  
30  
31 leaders referred by Scleroderma Canada (English) or Sclérodemie Québec (French), the Scleroderma  
32  
33 Foundation (USA), Scleroderma & Raynaud's UK, the Scleroderma Association of New South Wales  
34  
35 (Australia), and Scleroderma New Zealand.

36  
37  
38  
39  
40  
41  
42 In sum, the SPIN-SSLED feasibility trial ensured that trial methodology was feasibly  
43  
44 implemented and that the online intervention was user-friendly and acceptable to participants.  
45  
46 Participants provided suggestions for adjustments to content that will be implemented before  
47  
48 undertaking a full-scale RCT of the SPIN-SSLED program to assess effectiveness.  
49  
50  
51  
52  
53  
54  
55  
56  
57  
58  
59  
60

## **AUTHORS CONTRIBUTIONS**

BDT, VLM, GE-B, SP, MS, MH, and RWP were responsible for the study conception and design. BDT, LD, MP, KA, MEC, LT, and SH were responsible for implementation of the trial or acquisition, analysis, and interpretation of trial data. BDT drafted the manuscript. All authors provided a critical review and approved the final manuscript. BDT is the guarantor.

## **ACKNOWLEDGEMENTS**

Not applicable.

## **FUNDING STATEMENT**

Funding from the Scleroderma Society of Ontario and the Canadian Institutes of Health Research (PJT-156429) was used for development of the SPIN-SSLED Program and preliminary research. The trial was funded by the Canadian Initiative for Outcomes in Rheumatology cAre. Dr. Thombs was supported by a Fonds de Recherche Québec - Santé (FRQS) researcher award outside of the present work. Dr. Platt holds the Albert Boehringer I Chair in Pharmacoepidemiology. No sponsor or funder was involved in the study design; in the collection, analysis and interpretation of the data; in the writing of the report; or in the decision to submit the paper for publication.

## **COMPETING INTERESTS STATEMENT**

All authors have completed the ICMJE uniform disclosure form at [www.icmje.org/coi\\_disclosure.pdf](http://www.icmje.org/coi_disclosure.pdf) and declare that they have no competing interests.

## **DATA SHARING STATEMENT**

All data extracted and analysed for the present study are available from the corresponding author.

## REFERENCES

1. Kralik D. The quest for ordinariness: transition experienced by midlife women living with chronic illness. *J Adv Nurs* 2002;39:146-154.
2. Karasz A, Ouellette SC. Role strain and psychological well-being in women with systemic lupus erythematosus. *Women Health* 1995;23:41-57.
3. Kole A, Faurisson F. The voice of 12,000 patients: experiences and expectations of rare disease patients on diagnosis and care in Europe. 2009. [http://www.eurordis.org/IMG/pdf/voice\\_12000\\_patients/EURORDISCARE\\_FULLBOOKr.pdf](http://www.eurordis.org/IMG/pdf/voice_12000_patients/EURORDISCARE_FULLBOOKr.pdf). Accessed February 10, 2019.
4. European Organisation for Rare Diseases. Rare diseases: understanding this public health priority. 2005. [http://www.eurordis.org/IMG/pdf/princeps\\_document-EN.pdf](http://www.eurordis.org/IMG/pdf/princeps_document-EN.pdf). Accessed February 10, 2019.
5. Cohen JS, Biesecker BB. Quality of life in rare genetic conditions: a systematic review of the literature. *Am J Med Genet A* 2010;152:1136-56.
6. Huyard C. What, if anything, is specific about having a rare disorder? Patients' judgements on being ill and being rare. *Health Expect* 2009;12:361-70.
7. Nettleton S, Watt I, O'Malley L, et al. Understanding the narratives of people who live with medically unexplained illness. *Patient Educ Couns* 2005;56:205-21.

- 1  
2  
3 8. Van Walsem MR, Howe EI, Iversen K, Frich JC, Andelic N. Unmet needs for healthcare and  
4  
5  
6 social support services in patients with Huntington's disease: a cross-sectional  
7  
8  
9 population-based study. *Orphanet J Rare Dis* 2015;10:124.  
10
- 11 9. Anderson M, Elliott EJ, Zurynski YA. Australian families living with a rare disease:  
12  
13  
14 experiences of diagnosis, health services use and needs for psychosocial support.  
15  
16  
17 *Orphanet J Rare Dis* 2013;8:22.  
18
- 19 10. Dwyer AA, Quinton R, Morin D, Pitteloud N. Identifying the unmet health needs of  
20  
21  
22 patients with congenital hypogonadotropic hypogonadism using a web-based needs  
23  
24  
25 assessment: implications for online interventions and peer-to-peer support. *Orphanet J*  
26  
27  
28 *Rare Dis* 2014;9:83.  
29
- 30 11. Kasparian NA, Rutstein A, Sansom-Daly UM, et al. Through the looking glass: an  
31  
32  
33 exploratory study of the lived experiences and unmet needs of families affected by Von  
34  
35  
36 Hippel-Lindau disease. *Eur J Hum Genet* 2015;23:34-40.  
37
- 38 12. Holtzclaw Williams P. Policy framework for rare disease health disparities. *Policy Polit Nurs*  
39  
40  
41 *Pract* 2011;12:114-118.  
42
- 43 13. Newman S, Steed L, Mulligan K. Self-management interventions for chronic illness. *Lancet*  
44  
45  
46 2004;364:1523-1537.  
47
- 48 14. Davison KP, Pennebaker JW, Dickerson SS. Who talks? The social psychology of illness  
49  
50  
51 support groups. *Am Psychol* 2000;55:205-217.  
52  
53  
54  
55  
56  
57  
58  
59



- 1  
2  
3 15. Kwakkenbos L, Jewett LR, Baron M, et al. The Scleroderma Patient-centered Intervention  
4  
5 Network (SPIN): protocol for a cohort multiple randomised controlled trial (cmRCT)  
6  
7 design to support trials of psychosocial and rehabilitation interventions in a rare disease  
8  
9 context. *BMJ Open* 2013;3:eoo3563.  
10  
11
- 12  
13 16. Reimann A, Bend J, Dembski B. [Patient-centred care in rare diseases. A patient  
14  
15 organisations' perspective]. *Bundesgesundheitsblatt Gesundheitsforschung*  
16  
17 *Gesundheitsschutz* 2007;50:1484-1493.  
18  
19
- 20  
21 17. Gumuchian ST, Delisle VC, Kwakkenbos L, et al. Reasons for attending support groups and  
22  
23 organisational preferences: the European scleroderma support group members survey.  
24  
25 *Disabil Rehabil* 2017;19:1-9.  
26  
27
- 28  
29 18. Delisle VC, Gumuchian ST, Peláez S, et al. Reasons for non-participation in scleroderma  
30  
31 support groups. *Clin Exp Rheumatol* 2016;34:56-62.  
32  
33
- 34  
35 19. Gumuchian ST, Delisle VC, Peláez S, et al. Reasons for not participating in scleroderma  
36  
37 patient support groups: a cross-sectional study. *Arthritis Care Res* 2018;70:275-283.  
38  
39
- 40  
41 20. Delisle VC, Gumuchian ST, El-Baalbaki G, et al. Training and support needs of scleroderma  
42  
43 support group facilitators: the North American Scleroderma Support Group Facilitators  
44  
45 Survey. *Disabil Rehabil* 2018;25:1-6.  
46  
47
- 48  
49 21. Aymé S, Kole A, Groft S. Empowerment of patients: lessons from the rare diseases  
50  
51 community. *Lancet* 2008;371:2048-2051.  
52  
53  
54  
55  
56  
57  
58  
59

- 1  
2  
3 22. Barg FK, Gullatte MM. Cancer support groups: Meeting the needs of African Americans  
4  
5 with cancer. *Semin Oncol Nurs* 2001;17:171-178.  
6  
7
- 8  
9 23. Seibold J. Scleroderma. In Harris ED, Budd RC, Firestein GS, et al, editors. Kelly's Textbook  
10  
11 of Rheumatology. Philadelphia: *Elsevier*; 2005. pp. 1279-1308.  
12  
13
- 14 24. Mayes M. Systemic sclerosis: clinical features. In Klippel JH, Stone JH, Crafford LJ, White  
15  
16 PH, editors. *Primer on the Rheumatic Diseases*. 13<sup>th</sup> ed. New York: Springer and Arthritis  
17  
18 Foundation; 2008: pp. 343-350.  
19  
20
- 21 25. Wigley FM, Hummers LK. Clinical features of systemic sclerosis. In: Hochberg MC, Silman,  
22  
23 A.J., Smolen, J.S., Weinblatt ME, Weismann WH, eds. *Rheumatology*. 3rd ed. Philadelphia:  
24  
25 *Mosby*; 2003:1463-1480.  
26  
27
- 28 26. Kwakkenbos L, Delisle VC, Fox RS, et al. Psychosocial aspects of scleroderma. *Rheum Dis*  
29  
30 *Clin North Am* 2015;41:519-528.  
31  
32
- 33 27. Scleroderma Canada. Find a support group. [www.scleroderma.ca/Support/Find-A-](http://www.scleroderma.ca/Support/Find-A-Support-Group.php)  
34  
35 [Support-Group.php](http://www.scleroderma.ca/Support/Find-A-Support-Group.php). Accessed February 10, 2019.  
36  
37
- 38 28. Scleroderma Foundation. Support groups.  
39  
40 [www.scleroderma.org/site/PageServer?pagename=patients\\_supportgroups#.Vbec7RZvdF](http://www.scleroderma.org/site/PageServer?pagename=patients_supportgroups#.Vbec7RZvdFw)  
41  
42 [w](http://www.scleroderma.org/site/PageServer?pagename=patients_supportgroups#.Vbec7RZvdFw). Accessed February 10, 2019.  
43  
44  
45  
46  
47
- 48 29. Scleroderma & Raynaud's UK. Find support. [www.sruk.co.uk/find-support/](http://www.sruk.co.uk/find-support/). Accessed  
49  
50  
51 February 10, 2019.  
52  
53  
54  
55  
56  
57  
58  
59  
60

- 1  
2  
3  
4 30. Scleroderma Association of New South Wales. Regional support groups.  
5  
6 www.sclerodermansw.org/regional-support-groups. Accessed February 10, 2019.  
7  
8  
9 31. Delisle VC, Gumuchian ST, Kloda LA, et al. The effect of support group peer facilitator  
10  
11 training programs on peer-facilitator and support group member outcomes: a systematic  
12  
13 review. *BMJ Open* 2016;6:e013325.  
14  
15  
16 32. Zordan R, Butow P, Kirsten L et al. Supporting the supporters: a randomised controlled  
17  
18 trial of interventions to assist the leaders of cancer support groups. *J Community Psychol*  
19  
20 2015;43:261–77.  
21  
22  
23  
24 33. Eldridge SM, Chan CL, Campbell MJ, et al. CONSORT 2010 statement: extension to pilot  
25  
26 and feasibility trials. *BMJ* 2016;355:i5239.  
27  
28  
29  
30 34. Boud D, Feletti G. The challenge of problem-based learning (2<sup>nd</sup> ed). London: Kogan Page; 1997.  
31  
32  
33 35. Duch BJ, Groh SE, Allen DE. Why problem-based learning? A case study of institutional change  
34  
35 in undergraduate education. In Duch BJ, Groh SE, Allen DE, editors. The power of problem-based  
36  
37 learning (pp. 3-11). Sterling, VA: Stylus; 2001.  
38  
39 36. Hmelo-Silver CE. Problem-based learning: What and how do students learn? *Educ Psychol Rev*  
40  
41 2004;16:235-266.  
42  
43  
44 37. Torp L, Sage S. Problems as possibilities: Problem-based learning for K-16 education (2<sup>nd</sup> ed).  
45  
46 Alexandria, VA: Association for Supervision and Curriculum Development; 2002.  
47  
48 38. Hay-Hansson AW, Eldevik S. Training discrete trials teaching skills using videoconference. *Res*  
49  
50 *Autism Spect Disord* 2013;7:1300-1309.  
51  
52  
53 39. Seibert DC, Guthrie JT, Adamo G. Improving learning outcomes: Integration of standardized  
54  
55 patients & telemedicine technology. *Nurs Educ Perspect* 2004;25:232-237.  
56  
57  
58  
59  
60

- 1  
2  
3 40. Xavier K. Clinical supervision and education via videoconference: a feasibility project. *J Telemed*  
4  
5 *Telecare* 2007;13:206-209.  
6  
7  
8 41. Marziali E, Donahue P. Caring for others: internet video-conferencing group intervention for  
9  
10 family caregivers of older adults with neurodegenerative disease. *Gerontologist* 2006;46:398-403.  
11  
12 42. Fisher WW, Luczynski KC, Hood SA, et al. Preliminary findings of a randomised clinical trial of  
13  
14 a virtual training program for applied behavior analysis technicians. *Res Autism Spect Disord*  
15  
16 2014;8:1044-1054.  
17  
18  
19 43. Hommel KA, Gray WN, Hente E, et al. The Telehealth Enhancement of Adherence to Medication  
20  
21 (TEAM) in pediatric IBD trial: Design and methodology. *Contemp Clin Trials* 2015;43:105-113.  
22  
23  
24 44. Williams LK, McCarthy MC, Burke K, Anderson V, Rinehart N. Addressing behavioral impacts  
25  
26 of childhood leukemia: A feasibility pilot randomised controlled trial of a group  
27  
28 videoconferencing parenting intervention. *Eur J Oncol N* 2016;24:61-69.  
29  
30  
31 45. Shoemaker SJ, Wolf MS, Brach C. Development of the Patient Education Materials Assessment  
32  
33 Tool (PEMAT): a new measure of understandability and actionability for print and audiovisual  
34  
35 and patient information. *Patient Educ Couns* 2014;96:395-403.  
36  
37  
38 46. Pal NE, Gumuchian ST, Delisle VC, et al. Development and preliminary validation of the  
39  
40 Scleroderma Support Group Leader Self-efficacy Scale. *J Scleroderma Relat Disord* 2018;3:106-  
41  
42 111.  
43  
44  
45 47. Page BJ, Pietrzak DR, Lewis TF. Development of the group leader self-efficacy instrument.  
46  
47  
48 *J Spec Group Work* 2001; 26:168-84.  
49  
50  
51 48. Zordan RD, Juraskova I, Butow PN, et al. Exploring the impact of training on the  
52  
53 experience of Australian support group leaders: current practices and implications for  
54  
55 research. *Health Expect* 2010;13:427-440.  
56  
57  
58  
59  
60

- 1  
2  
3 49. Butow PN, Ussher J, Kirsten L, et al. Sustaining leaders of cancer support groups: the role,  
4  
5 needs, and difficulties of leaders. *Soc Work Health Care* 2005;42:39-55.  
6  
7  
8 50. Demerouti E, Bakker AB, Vardakou I, Kantas A. The convergent validity of two burnout  
9  
10 instruments: a multitrait-multimethod analysis. *Eur J Psychol Assess* 2002;18:296-307.  
11  
12  
13 51. Halbesleben JRB, Demerouti E. The construct validity of an alternative measure of burnout:  
14  
15 Investigating the English translation of the Oldenburg Burnout Inventory. *Work Stress*  
16  
17 2005;19:208-220.  
18  
19  
20 52. Reis D, Xanthopoulou D, Tsaousis I. Measuring job and academic burnout with the  
21  
22 Oldenburg Burnout Inventory (OLBI): factorial invariance across countries and samples.  
23  
24  
25  
26  
27 *Burn Res* 2015;2:8-18.  
28  
29 53. Kroenke K, Strine TW, Spitzer RL, et al. The PHQ-8 as a measure of current depression in  
30  
31 the general population. *J Affect Disord* 2009;114:163-173.  
32  
33  
34 54. Milette K, Hudson M, Baron M, et al. Comparison of the PHQ-9 and CES-D depression  
35  
36 scales in systemic sclerosis: internal consistency reliability, convergent validity and clinical  
37  
38  
39  
40  
41  
42  
43 55. Kwakkenbos L, Thombs BD, Khanna D, et al. Performance of the Patient-Reported Outcomes  
44  
45 Measurement Information System-29 (PROMIS-29) in scleroderma: a Scleroderma Patient-  
46  
47  
48 centered Intervention Network (SPIN) Cohort Study. *Rheumatology* 2017;56:1302-1311.  
49  
50 56. Larsen DL, Attkisson CC, Hargreaves WA, Nguyen TD. Assessment of client/patient satisfaction:  
51  
52 development of a general scale. *Eval Program Plann* 1979;2:197-207.  
53  
54  
55  
56  
57  
58  
59  
60

- 1  
2  
3 57. Kelly PJ, Kyngdon F, Ingram I, et al. The Client Satisfaction Questionnaire-8: Psychometric  
4 properties in a cross-sectional survey of people attending residential substance abuse treatment.  
5  
6 *Drug Alcohol Rev* 2018;37:79-86.  
7  
8  
9  
10 58. Zwarenstein M, Treweek S, Gagnier JJ, et al. Improving the reporting of pragmatic trials: an  
11 extension of the CONSORT statement. *BMJ* 2008;337:a2390.  
12  
13  
14 59. Roland M, Torgerson DJ. Understanding controlled trials: What are pragmatic trials? *BMJ*  
15 1998;316:285.  
16  
17  
18  
19 60. Lohr S, Schochet PZ, Sanders E. Partially nested randomised controlled trials in educational  
20 research: a guide to design and analysis. NCER 2014-2000. Washington, DC: National Center for  
21 Education Research; 2014.  
22  
23  
24  
25  
26 61. Bauer DJ, Sterba SK, Hallfors DD. Evaluating group-based interventions when control  
27 participants are ungrouped. *Multivar Behav Res* 2008;43:210-236.  
28  
29  
30  
31 62. Schweig JD, Pane JF. Intention-to-treat analysis in partially nested randomised controlled trials  
32 with real-world complexity. *Int J of Res Meth Educ* 2016;39:268-286.  
33  
34  
35  
36  
37  
38  
39  
40  
41  
42  
43  
44  
45  
46  
47  
48  
49  
50  
51  
52  
53  
54  
55  
56  
57  
58  
59  
60

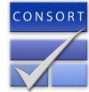

## CONSORT 2010 checklist of information to include when reporting a pilot or feasibility trial\*

| Section/Topic                    | Item No | Checklist item                                                                                                                                                                              | Reported on page No |
|----------------------------------|---------|---------------------------------------------------------------------------------------------------------------------------------------------------------------------------------------------|---------------------|
| <b>Title and abstract</b>        |         |                                                                                                                                                                                             |                     |
|                                  | 1a      | Identification as a pilot or feasibility randomised trial in the title                                                                                                                      | 1                   |
|                                  | 1b      | Structured summary of pilot trial design, methods, results, and conclusions (for specific guidance see CONSORT abstract extension for pilot trials)                                         | 3-4                 |
| <b>Introduction</b>              |         |                                                                                                                                                                                             |                     |
| Background and objectives        | 2a      | Scientific background and explanation of rationale for future definitive trial, and reasons for randomised pilot trial                                                                      | 6                   |
|                                  | 2b      | Specific objectives or research questions for pilot trial                                                                                                                                   | 7                   |
| <b>Methods</b>                   |         |                                                                                                                                                                                             |                     |
| Trial design                     | 3a      | Description of pilot trial design (such as parallel, factorial) including allocation ratio                                                                                                  | 7                   |
|                                  | 3b      | Important changes to methods after pilot trial commencement (such as eligibility criteria), with reasons                                                                                    | 7                   |
| Participants                     | 4a      | Eligibility criteria for participants                                                                                                                                                       | 7-8                 |
|                                  | 4b      | Settings and locations where the data were collected                                                                                                                                        | 8                   |
|                                  | 4c      | How participants were identified and consented                                                                                                                                              | 8                   |
| Interventions                    | 5       | The interventions for each group with sufficient details to allow replication, including how and when they were actually administered                                                       | 9-10                |
| Outcomes                         | 6a      | Completely defined prespecified assessments or measurements to address each pilot trial objective specified in 2b, including how and when they were assessed                                | 11-13               |
|                                  | 6b      | Any changes to pilot trial assessments or measurements after the pilot trial commenced, with reasons                                                                                        | 7                   |
|                                  | 6c      | If applicable, prespecified criteria used to judge whether, or how, to proceed with future definitive trial                                                                                 | NA                  |
| Sample size                      | 7a      | Rationale for numbers in the pilot trial                                                                                                                                                    | 13                  |
|                                  | 7b      | When applicable, explanation of any interim analyses and stopping guidelines                                                                                                                | NA                  |
| Randomisation:                   |         |                                                                                                                                                                                             |                     |
| Sequence generation              | 8a      | Method used to generate the random allocation sequence                                                                                                                                      | NA                  |
|                                  | 8b      | Type of randomisation(s); details of any restriction (such as blocking and block size)                                                                                                      | NA                  |
| Allocation concealment mechanism | 9       | Mechanism used to implement the random allocation sequence (such as sequentially numbered containers), describing any steps taken to conceal the sequence until interventions were assigned | NA                  |

|                                                      |     |                                                                                                                                                                                       |            |
|------------------------------------------------------|-----|---------------------------------------------------------------------------------------------------------------------------------------------------------------------------------------|------------|
| Implementation                                       | 10  | Who generated the random allocation sequence, who enrolled participants, and who assigned participants to interventions                                                               | NA         |
| Blinding                                             | 11a | If done, who was blinded after assignment to interventions (for example, participants, care providers, those assessing outcomes) and how                                              | NA         |
|                                                      | 11b | If relevant, description of the similarity of interventions                                                                                                                           | NA         |
| Statistical methods                                  | 12  | Methods used to address each pilot trial objective whether qualitative or quantitative                                                                                                | 13-14      |
| <b>Results</b>                                       |     |                                                                                                                                                                                       |            |
| Participant flow (a diagram is strongly recommended) | 13a | For each group, the numbers of participants who were approached and/or assessed for eligibility, randomly assigned, received intended treatment, and were assessed for each objective | 14-15      |
|                                                      | 13b | For each group, losses and exclusions after randomisation, together with reasons                                                                                                      | 14-15      |
| Recruitment                                          | 14a | Dates defining the periods of recruitment and follow-up                                                                                                                               | 14         |
|                                                      | 14b | Why the pilot trial ended or was stopped                                                                                                                                              | NA         |
| Baseline data                                        | 15  | A table showing baseline demographic and clinical characteristics for each group                                                                                                      | 15         |
| Numbers analysed                                     | 16  | For each objective, number of participants (denominator) included in each analysis. If relevant, these numbers should be by randomised group                                          | All tables |
| Outcomes and estimation                              | 17  | For each objective, results including expressions of uncertainty (such as 95% confidence interval) for any estimates. If relevant, these results should be by randomised group        | 21-22      |
| Ancillary analyses                                   | 18  | Results of any other analyses performed that could be used to inform the future definitive trial                                                                                      | NA         |
| Harms                                                | 19  | All important harms or unintended effects in each group (for specific guidance see CONSORT for harms)                                                                                 | 16         |
|                                                      | 19a | If relevant, other important unintended consequences                                                                                                                                  | NA         |
| <b>Discussion</b>                                    |     |                                                                                                                                                                                       |            |
| Limitations                                          | 20  | Pilot trial limitations, addressing sources of potential bias and remaining uncertainty about feasibility                                                                             | 25         |
| Generalisability                                     | 21  | Generalisability (applicability) of pilot trial methods and findings to future definitive trial and other studies                                                                     | 25         |
| Interpretation                                       | 22  | Interpretation consistent with pilot trial objectives and findings, balancing potential benefits and harms, and considering other relevant evidence                                   | 26         |
|                                                      | 22a | Implications for progression from pilot to future definitive trial, including any proposed amendments                                                                                 | 26         |
| <b>Other information</b>                             |     |                                                                                                                                                                                       |            |
| Registration                                         | 23  | Registration number for pilot trial and name of trial registry                                                                                                                        | 4          |
| Protocol                                             | 24  | Where the pilot trial protocol can be accessed, if available                                                                                                                          | NA         |
| Funding                                              | 25  | Sources of funding and other support (such as supply of drugs), role of funders                                                                                                       | 27         |
|                                                      | 26  | Ethical approval or approval by research review committee, confirmed with reference number                                                                                            | 9          |



Citation: Eldridge SM, Chan CL, Campbell MJ, Bond CM, Hopewell S, Thabane L, et al. CONSORT 2010 statement: extension to randomised pilot and feasibility trials. BMJ. 2016;355.

\*We strongly recommend reading this statement in conjunction with the CONSORT 2010, extension to randomised pilot and feasibility trials, Explanation and Elaboration for important clarifications on all the items. If relevant, we also recommend reading CONSORT extensions for cluster randomised trials, non-inferiority and equivalence trials, non-pharmacological treatments, herbal interventions, and pragmatic trials. Additional extensions are forthcoming: for those and for up to date references relevant to this checklist, see [www.consort-statement.org](http://www.consort-statement.org).

For peer review only

1  
2  
3  
4  
5  
6  
7  
8  
9  
10  
11  
12  
13  
14  
15  
16  
17  
18  
19  
20  
21  
22  
23  
24  
25  
26  
27  
28  
29  
30  
31  
32  
33  
34  
35  
36  
37  
38  
39  
40  
41  
42  
43  
44  
45  
46

# BMJ Open

## The Scleroderma Patient-centered Intervention Network – Scleroderma Support group Leader Education (SPIN-SSLED) Program: Non-randomised Feasibility Trial

|                                 |                                                                                                                                                                                                                                                                                                                                                                                                                                                                                                                                                                                                                                                                                                                                                                                                                                                                                                                                                                                                                                                                                |
|---------------------------------|--------------------------------------------------------------------------------------------------------------------------------------------------------------------------------------------------------------------------------------------------------------------------------------------------------------------------------------------------------------------------------------------------------------------------------------------------------------------------------------------------------------------------------------------------------------------------------------------------------------------------------------------------------------------------------------------------------------------------------------------------------------------------------------------------------------------------------------------------------------------------------------------------------------------------------------------------------------------------------------------------------------------------------------------------------------------------------|
| Journal:                        | <i>BMJ Open</i>                                                                                                                                                                                                                                                                                                                                                                                                                                                                                                                                                                                                                                                                                                                                                                                                                                                                                                                                                                                                                                                                |
| Manuscript ID                   | bmjopen-2019-029935.R1                                                                                                                                                                                                                                                                                                                                                                                                                                                                                                                                                                                                                                                                                                                                                                                                                                                                                                                                                                                                                                                         |
| Article Type:                   | Original research                                                                                                                                                                                                                                                                                                                                                                                                                                                                                                                                                                                                                                                                                                                                                                                                                                                                                                                                                                                                                                                              |
| Date Submitted by the Author:   | 05-Jun-2019                                                                                                                                                                                                                                                                                                                                                                                                                                                                                                                                                                                                                                                                                                                                                                                                                                                                                                                                                                                                                                                                    |
| Complete List of Authors:       | Thombs, Brett; McGill University, Psychiatry<br>Dyas, Laura; Scleroderma Foundation, Michigan Chapter<br>Pépin, Mia; Lady Davis Institute for Medical Research, Psychiatry<br>Aguila, Kyle; Lady Davis Institute for Medical Research, Psychiatry<br>Carrier, Marie-Eve; Jewish General Hospital, Lady Davis Institute for Medical Research<br>Tao, Lydia; Lady Davis Institute for Medical Research, Psychiatry<br>Harb, Sami; Lady Davis Institute for Medical Research, Psychiatry<br>Malcarne, Vanessa; San Diego State University, Psychology; San Diego State University/University of California, San Diego Joint Doctoral Program in Clinical Psychology<br>El-Baalbaki, Ghassan; Université du Québec à Montréal, Psychology<br>Peláez, Sandra; Lady Davis Institute for Medical Research, Psychiatry<br>Sauve, Maureen; Scleroderma Canada, Scleroderma Society of Ontario<br>Hudson, Marie; Jewish General Hospital, Lady Davis Institute for Medical Research<br>Platt, Robert; McGill University, Biostatistics<br>Patient Advisory Team, SPIN-SSLED; SPIN, SSLED |
| <b>Primary Subject Heading</b>: | Patient-centred medicine                                                                                                                                                                                                                                                                                                                                                                                                                                                                                                                                                                                                                                                                                                                                                                                                                                                                                                                                                                                                                                                       |
| Secondary Subject Heading:      | Rheumatology                                                                                                                                                                                                                                                                                                                                                                                                                                                                                                                                                                                                                                                                                                                                                                                                                                                                                                                                                                                                                                                                   |
| Keywords:                       | patient education, peer support, feasibility trial, scleroderma, systemic sclerosis, support groups                                                                                                                                                                                                                                                                                                                                                                                                                                                                                                                                                                                                                                                                                                                                                                                                                                                                                                                                                                            |
|                                 |                                                                                                                                                                                                                                                                                                                                                                                                                                                                                                                                                                                                                                                                                                                                                                                                                                                                                                                                                                                                                                                                                |

SCHOLARONE™  
Manuscripts

## The Scleroderma Patient-centered Intervention Network – Scleroderma Support group

### Leader Education (SPIN-SSLED) Program: Non-randomised Feasibility Trial

Brett D. Thombs,<sup>1-7</sup> Laura Dyas,<sup>8</sup> Mia Pépin,<sup>1</sup> Kylene Aguila,<sup>1</sup> Marie-Eve Carrier,<sup>1</sup> Lydia Tao,<sup>1</sup>

Sami Harb,<sup>1</sup> Vanessa L. Malcarne,<sup>9,10</sup> Ghassan El-Baalbaki,<sup>11</sup> Sandra Peláez,<sup>1,6</sup> Maureen Sauvé,<sup>12</sup>

Marie Hudson,<sup>1,4</sup> Robert W. Platt,<sup>1,3</sup> SPIN-SSLED Patient Advisory Team.<sup>13</sup>

<sup>1</sup>Lady Davis Institute for Medical Research, Jewish General Hospital, Montreal, Quebec, Canada;

<sup>2</sup>Department of Psychiatry, McGill University, Montreal, Quebec, Canada;

<sup>3</sup>Department of Epidemiology, Biostatistics, and Occupational Health, McGill University, Montreal, Quebec, Canada;

<sup>4</sup>Department of Medicine, McGill University, Montreal, Quebec, Canada;

<sup>5</sup>Department of Psychology, McGill University, Montreal, Quebec, Canada;

<sup>6</sup>Department of Educational and Counselling Psychology, McGill University, Montreal, Quebec, Canada;

<sup>7</sup>Biomedical Ethics Unit, McGill University, Montreal, Quebec, Canada;

<sup>8</sup>Scleroderma Foundation Michigan Chapter, Southfield, Michigan, USA;

<sup>9</sup>Department of Psychology, San Diego State University, California, USA;

<sup>10</sup>San Diego Joint Doctoral Program in Clinical Psychology, San Diego State University/University of California, California, USA;

1  
2  
3 <sup>11</sup>Department of Psychology, Université du Québec à Montréal, Montreal, Quebec, Canada;  
4  
5

6 <sup>12</sup>Scleroderma Society of Ontario and Scleroderma Canada, Hamilton, Ontario, Canada;  
7

8 <sup>13</sup>SPIN-SSLED Patient Advisory Team Members: Kerri Connolly, Director of Programs and Services  
9  
10 of the Scleroderma Foundation, Danvers, Massachusetts, USA; Stephen Elrod, Southern California  
11  
12 Patient Group, Los Angeles, California, USA; Catherine Fortuné, Ottawa Scleroderma Support Group,  
13  
14 Ottawa, Ontario, Canada; Karen Gottesman, Director of Pharma & Biotech Engagement Scleroderma  
15  
16 Foundation, Los Angeles, California, USA; Karen Nielsen, Scleroderma Society of Ontario, Hamilton,  
17  
18 Ontario, Canada; Geneviève Guillot, Sclérodermie Québec, Longueuil, Quebec, Canada; Ken Rozee,  
19  
20 Scleroderma Society of Nova Scotia, Halifax, Nova Scotia, Canada; Amy Gietzen, Scleroderma  
21  
22 Foundation, Danvers, Massachusetts, USA; Michelle Richard, President of Scleroderma Canada,  
23  
24 Halifax, Nova Scotia, Canada; Nancy Stephens, Michigan Patient Group, Detroit, Michigan, USA.  
25  
26  
27  
28  
29  
30  
31

32 **Address for Correspondence:**  
33

34 Brett D. Thombs, PhD; Jewish General Hospital; 4333 Côte Ste Catherine Road; Montreal,  
35  
36 Quebec H3T 1E4; Telephone (514) 340-8222 ext. 25112; E-mail: brett.thombs@mcgill.ca.  
37  
38  
39  
40  
41

42 **Word Count:** 4,066  
43  
44  
45  
46  
47  
48  
49  
50  
51  
52  
53  
54  
55  
56  
57  
58  
59  
60

## ABSTRACT

**Objectives:** The Scleroderma Patient-centered Intervention Network – Scleroderma Support group Leader EDucation (SPIN-SSLED) Program was designed to improve confidence and self-efficacy and to reduce burden for support group leaders. Objectives of the feasibility trial were to (1) evaluate feasibility of program delivery, including required resources, management issues, and scientific aspects; and (2) assess user satisfaction and identify any modifications needed to improve program content or delivery based on participant feedback.

**Design:** Non-randomised feasibility trial.

**Setting:** North American scleroderma patient organisations.

**Participants:** Current support group leaders or potential new leaders referred by patient organisations.

**Intervention:** The program included 13 modules delivered live via videoconference over 3 months (April to July 2018) in 60- to 90-minute sessions.

**Outcome Measures:** (1) Elements of feasibility, including enrolment and consent procedures, percentage of referred group leaders who consented to participate, session attendance, and technical support requirements; (2) program usability, understandability, organisation, and clarity; (3) leader satisfaction with the program; and (4) planned trial outcome measures, including support group leader self-efficacy, burnout, emotional distress, and physical function.

**Results:** All 12 referred potential participants consented to enrol, and 10 were included in 2 training groups of 5 participants each. Participants attended 95% of sessions. Required technical support was minimal, and videoconferencing technology functioned well. Overall

1  
2  
3 program satisfaction rating was 9.4/10. Mean item rating on the 8 items of the Client  
4  
5  
6 Satisfaction Questionnaire-8 was 3.83 (1 = low satisfaction; 4 = high satisfaction). Pre-post  
7  
8  
9 scores on the Scleroderma Support Group Leader Self-efficacy Scale increased by 1.7  
10  
11 standard deviations (large effect); scores on burnout, emotional distress, and physical  
12  
13  
14 function improved by 0.44, 0.38, and 0.45 standard deviations (moderate effects).  
15

16 **Conclusion:** The SPIN-SSLED Program was feasibly delivered, including management,  
17  
18  
19 resource, and scientific aspects. Participant satisfaction was high. The program is ready to be  
20  
21  
22 tested in a full-scale randomised controlled trial.  
23

24 **Funding Source:** Canadian Initiative for Outcomes in Rheumatology cAre  
25

26  
27 **Trial Registration:** NCT03508661  
28

29  
30 **Key Words:** patient education; peer support; feasibility trial; scleroderma; support groups;  
31  
32  
33 systemic sclerosis  
34  
35  
36  
37  
38  
39  
40  
41  
42  
43  
44  
45  
46  
47  
48  
49  
50  
51  
52  
53  
54  
55  
56  
57  
58  
59  
60

### STRENGTHS AND LIMITATIONS OF THIS STUDY

- This is the first trial to test the feasibility of delivering an education and training program via videoconference to peer support group leaders.
- The education and training program was developed in a partnership that included scleroderma peer support group leaders, patient organisation leaders, and researchers and health care professionals.
- Trial outcomes included elements of feasibility (e.g., management, resources, scientific aspects); program usability, understandability, organisation, and clarity; leader satisfaction with the program; and planned trial outcome measures.
- This was a non-randomised feasibility trial that only included 10 participants in 2 training groups and did not include a control group; generalisability of results outside of scleroderma is not known.

## INTRODUCTION

People with rare diseases face the same challenges as those with more common diseases plus unique challenges, including limited disease education and lack of specialised support options.[1-12] Professionally organised support services for common diseases are often available through the healthcare system,[13, 14] but are not typically available in rare diseases.[10, 15] As a result, some people with rare diseases rely on peer-led support groups for disease-specific education and support.[16-20] Support group activities typically involve an educational or information-sharing component and the exchange of emotional and practical support.[14, 18-22].

Systemic sclerosis (SSc), or scleroderma, is a rare chronic, autoimmune connective tissue disease characterised by abnormal fibrotic processes and excessive collagen production.[23-25] Support groups, most led by people with SSc, play an important role for many people with the disease.[17, 26-30] Many people with SSc, however, cannot access support groups because they are not available close to where they live, and many initiated support groups are not sustained due to challenges that could be addressed via leader training.[18, 19]

A systematic review of randomised controlled trials (RCTs) that evaluated the effects of training programs for patient leaders of illness-based support groups on the competency, self-efficacy, burden, and emotional well-being of group leaders identified only one RCT that met inclusion criteria.[31] That trial [32] evaluated confidence and self-efficacy of cancer



1  
2  
3 support group leaders randomised to either 4-month long high-resource (N = 29; website,  
4 discussion forum, 2-day face-to-face training) or low-resource (N = 23; website, discussion  
5 forum) interventions. The RCT did not find evidence that the high-resource program was  
6 more effective. However, the trial was substantially underpowered, not enough information  
7 was provided to determine intervention content or how it was delivered, and the risk of bias  
8 was high due to methodological limitations.  
9  
10  
11  
12  
13  
14  
15  
16  
17  
18

19 The Scleroderma Patient-centered Intervention Network (SPIN) partnered with SS  
20 patients and patient organisations to develop the Scleroderma Support group Leader  
21 Education (SPIN-SSLED) Program. The program is a 13-session group videoconference  
22 training program, designed to improve skills and self-efficacy, reduce burnout, and improve  
23 emotional and physical function among support group leaders. The objectives of the SPIN-  
24 SSLED feasibility trial were to (1) evaluate the feasibility of steps needed to take place in a planned  
25 full-scale trial, including the *required resources* (e.g., staffing, time, and budget), *management issues*  
26 (e.g., related to optimising performance of personnel and data systems), and *scientific aspects* (e.g.,  
27 recruitment rates of eligible leaders, acceptability of intervention to leaders, assessing performance of  
28 outcome measures) and (2) identify any modifications needed to improve the content or delivery of the  
29 SPIN-SSLED Program based on participant feedback.  
30  
31  
32  
33  
34  
35  
36  
37  
38  
39  
40  
41  
42  
43  
44  
45

## 46 **METHODS**

47  
48 The SPIN-SSLED feasibility trial was a non-randomised study. It was registered prior to  
49 enrolling participants (NCT03508661) and, although not a randomised study, is reported based  
50 on items from the CONSORT extension for randomised pilot and feasibility trials.[33] There  
51  
52  
53  
54  
55  
56  
57  
58  
59  
60

1  
2  
3 were no changes to the feasibility trial protocol and no changes to planned outcomes after  
4  
5  
6 commencement of the trial.  
7

## 8 **Participants**

9  
10 Eligible participants for the SPIN-SSLED feasibility trial were current SSc support group  
11  
12 leaders or were identified by Scleroderma Canada or the Scleroderma Foundation (United States) as a  
13  
14 new leader who will initiate a new support group, were able to use the internet to access and  
15  
16 participate in training sessions and to complete study questionnaires online, were available to  
17  
18 participate in training sessions and to complete study questionnaires online, were available to  
19  
20 participate at times when sessions were scheduled, and were English-speaking, since both groups in  
21  
22 the feasibility trial were conducted in English. The full-scale trial will include groups conducted in  
23  
24 French, but individuals who participated in the feasibility study will be excluded from the full-scale  
25  
26 RCT. Thus, to ensure that there will be an adequate number of French-speaking participants in the full-  
27  
28 scale RCT, only English-speaking leaders were included in the feasibility study.  
29  
30

## 31 **Procedures**

32  
33 For the purpose of testing the feasibility of administering the SPIN-SSLED Program, we sought  
34  
35 10 group leaders to participate in two separate training groups of 5 participants each. We asked  
36  
37 Scleroderma Canada and the Scleroderma Foundation to generate an initial list of 12 interested  
38  
39 potential participants and obtained permission for the SPIN team to send them an email with an  
40  
41 invitation to participate in the feasibility trial and a copy of the consent form. Following the initial  
42  
43 email, SPIN personnel contacted potential participants by phone within 48 hours to describe the study,  
44  
45 assess their eligibility, review the consent form, and answer questions they may have had about the  
46  
47 study. Eligible leaders who verbally agreed to enrol in the study received a second email with the  
48  
49 consent form again attached, and they were able to consent via email by replying, *“I have read the  
50  
51 consent form and understand the terms of the feasibility study. I agree to participate in the study  
52  
53  
54  
55  
56  
57  
58  
59  
60*

1  
2  
3 *testing the feasibility of the SPIN-SSLED Program.*” The first 10 people to respond and consent were  
4  
5 enrolled, and the other 2 were put on a waiting list. All leaders who consented to participate and  
6  
7 enrolled received an email invitation including a clickable link to the online data management platform  
8  
9 where they were asked to complete baseline study measures. The email also included the date of their  
10  
11 first training session, the topic of the first session and information on how to login to the  
12  
13 videoconferencing system, as well as a link to the SPIN-SSLED online forum platform, where the  
14  
15 program manual and associated PowerPoint slides were available. Ongoing email and phone technical  
16  
17 support was available to help leaders with the consent process, access to the data management platform  
18  
19 to complete study measures, and training sessions.  
20  
21  
22  
23

24 The trial was approved by the ethics committee of the Centre intégré universitaire de santé et de  
25  
26 services sociaux du Centre-Ouest-de-l’Île-de-Montréal.  
27  
28

### 29 **Intervention**

30  
31 The SPIN-SSLED Program was developed by a team of researchers and health care  
32  
33 professionals with expertise in SSc, patient organisation representatives and a Support Group Advisory  
34  
35 Team comprised of people with SSc who are current SSc support group leaders. The program content  
36  
37 and design were based on results of our preliminary research on support groups in SSc, including  
38  
39 individual interviews and surveys with leaders, members, and non-attenders,[17-20] and informed by  
40  
41 instructional material for support group leaders in other diseases that we identified via the internet and  
42  
43 by consultations with support group leaders. The program uses a problem-based learning approach.  
44  
45 Problem-based learning is a learner-centred approach that integrates theory and practice by providing  
46  
47 the necessary knowledge and skills, presenting a complex, real-world problem, then working to  
48  
49 identify an approach to solving the problem.[34-37] To implement this, each module introduces a topic  
50  
51  
52  
53  
54  
55  
56  
57  
58  
59  
60

and provides an overview of key information. Then, there is a guided discussion among training group participants about possible approaches and solutions to problems.

The SPIN-SSLED Program included 13 modules that are delivered live via videoconference over the course of 3 months. Each module is delivered in a 60- to 90-minute session. Module topics include (1) the leader's role; (2) starting a support group; (3) structuring a support group meeting; (4) scleroderma 101; (5) successful support group culture; (6) managing support group dynamics I; (7) managing support group dynamics II; (8) grief and crisis in scleroderma; (9) marketing and recruitment; (10) the continuity of the group; (11) supporting yourself as a leader; (12) virtual support group meetings, and (13) support group leader resources. See Table 1 for module content. The program includes 11 filmed vignettes that demonstrate effective group facilitation techniques and ways to respond to problems that arise with the behaviours of specific group members or group interactions. In addition to the live modules, SPIN-SSLED participants receive a program manual that summarises didactic material that is provided in the sessions.

Table 1. Content of Program Modules

| Module Title                       | Module Description                                                                                                                                                                                                                                                                                                                    |
|------------------------------------|---------------------------------------------------------------------------------------------------------------------------------------------------------------------------------------------------------------------------------------------------------------------------------------------------------------------------------------|
| 1. The Support Group Leader's Role | This module discusses the benefits of being a support group leader, the expectations of what the role of leader involves (e.g. facilitation of meetings and interactions but not giving medical advice), and tips for being an effective and supportive leader.                                                                       |
| 2. Starting a Support Group        | This module discusses the purpose of a support group, what people with scleroderma hope to gain from support group, why some don't attend, establishing leadership (e.g. one leader, co-leader), membership (e.g. patients only, open to family, and friends), logistics of starting a group (e.g. time, place and meeting duration). |

|                                                     |                                                                                                                                                                                                                                                                                                                                                                                                                                                                    |
|-----------------------------------------------------|--------------------------------------------------------------------------------------------------------------------------------------------------------------------------------------------------------------------------------------------------------------------------------------------------------------------------------------------------------------------------------------------------------------------------------------------------------------------|
| 3. Structuring Support Group Meetings               | This module discusses formatting group meeting and how to successfully integrate both educational activities with emotional and practical support for members, setting up a meeting agenda.                                                                                                                                                                                                                                                                        |
| 4. Scleroderma 101                                  | This module shows a filmed conference by a physician specialized in scleroderma who explain the different types of scleroderma, symptoms, causes, treatments, and alternative approaches. The module also includes tips to evaluate credibility of information sources on the Internet.                                                                                                                                                                            |
| 5. Successful Support Group Culture                 | This module discusses the importance of establishing expectations and guidelines for the support group with members, the importance of confidentiality, how to create and maintain positive and productive support group culture using (1) encouraging statements, (2) open-ended questions, (3) body language, (4) linking similar experiences between members, and (5) summarizing discussions. This module uses video vignettes to illustrate these techniques. |
| 6. Managing Group Dynamics Part I                   | This module discusses managing difficult support group dynamics such as members who are “quick fixers”, overly talkative, how to maintain a positive group environment, conflict management and resolution for minor and larger issues. This module uses video vignettes to illustrate these techniques.                                                                                                                                                           |
| 7. Managing Group Dynamics Part II                  | This module discussed how to identify and respond to members who are overly shy or who are chronically negative, and what to do when members bring unsubstantiated, inaccurate or potentially misleading medical information to the group. This module uses video vignettes to illustrate these techniques.                                                                                                                                                        |
| 8. Grief and Crisis in Scleroderma                  | The module discusses different situations that may bring grief to members, stages of grief, supporting group members in grief, dealing with medical crises or death of group members.                                                                                                                                                                                                                                                                              |
| 9. Advertising and Recruiting for the Support Group | This module discusses how to advertise and promote a support group, how to recruit new members for support groups on ongoing basis, advertising through patient organizations and strategies to retain members.                                                                                                                                                                                                                                                    |

|                                     |                                                                                                                                                                                                                                                                                                                                                                                                        |
|-------------------------------------|--------------------------------------------------------------------------------------------------------------------------------------------------------------------------------------------------------------------------------------------------------------------------------------------------------------------------------------------------------------------------------------------------------|
| 10. The Continuity of the Group     | This module discusses the importance of understanding and overcoming reluctance in seeking feedback, the importance of feedback in the support group experience, how to obtain and respond to feedback, how to identify reasons why members may stop attending meetings and strategies to help maintain membership, how to keep members engaged and move your support group forward by making changes. |
| 11. Supporting Yourself as a Leader | This module discusses understanding what leader burnout is, understanding why it can happen and what the warning signs are, understanding the best way to address burnout including identifying methods of coping, understanding at what point it may be best for a leader to step down from his or her role, strategies to prevent experiencing leader burnout.                                       |
| 12. Remote support groups           | This module discusses the benefits of an online support group, finding the right technology, scheduling and programming, advertising and reaching your target audience, tips for successful online meetings.                                                                                                                                                                                           |
| 13. Resources                       | This module discusses strategies on how to obtain information and resources, how to communicate information effectively to members, the responsibilities of the national organization, meeting the resource needs of the group, access to the SPIN-SSLED Online Resource Center to download scleroderma talks, educational videos, and research articles for leaders and members of support groups.    |

Based on our previous experience with videoconferencing and consistent with previous trials of videoconference training, 5 group leaders were assigned to each training group to maximise effective interaction and participation.[38-41] Training sessions were delivered using the GoToMeeting® videoconferencing platform, a high-performance platform that has been used successfully for similar applications.[42-44] In addition to the videoconference sessions, participants had access to a secure, monitored SPIN-SSLED online forum via the Slack® communication tool to interact with other participants about program content. The two training groups were held in the evening.

### **Feasibility Outcomes**

Outcomes related to process and resources were assessed throughout the duration of the feasibility trial, and leader feedback was obtained upon completion of the program. The collected

1  
2  
3 measures of feasibility included assessments of the (1) enrolment and consent procedure, (2)  
4 percentage of referred and eligible group leaders who consented to participate, (3) personnel  
5 requirements to assist participants with accessing the GoToMeeting® videoconferencing platform for  
6 sessions and the online survey program Qualtrics® for online data collection pre-training and post-  
7 training, (4) technological performance of the videoconferencing system, and (5) any challenges for  
8 study personnel.  
9  
10  
11  
12  
13  
14  
15

16  
17 Individual semi-structured interviews were conducted with all participants via telephone upon  
18 completion of the 13 modules using items based on the Patient Education Materials Assessment Tool  
19 for Audiovisual Materials (PEMAT) [45] and addressed topics related to usability, understandability,  
20 organisation, and clarity of the SPIN-SSLED program, including its videoconference-based delivery.  
21  
22 The PEMAT included a single rating of satisfaction from 0 (worst possible) to 10 (best possible).  
23  
24  
25  
26  
27

### 28 **SPIN-SSLED Planned Trial Outcome Measures**

29  
30  
31 In the planned full-scale RCT, we will evaluate whether the SPIN-SSLED Program is effective  
32 in improving SSc support group leaders' self-efficacy for carrying out their leader role (primary) and if  
33 the program reduces burnout, improves emotional well-being, and improves physical function among  
34 support group leaders (secondary). The SPIN-SSLED feasibility trial was not intended to test  
35 hypotheses and did not have adequate power for this, but we collected trial outcome measures at the  
36 time of consent to participate in the trial and following completion of the program to evaluate the  
37 percentage of measures that were completed and to evaluate performance of the measures. Participants  
38 were emailed invitations to complete baseline and post-intervention measures using the online survey  
39 program Qualtrics®.  
40  
41  
42  
43  
44  
45  
46  
47  
48  
49  
50

51  
52 **Leader Self-Efficacy**: The Scleroderma Support Group Leader Self-efficacy Scale (SSGLSS)  
53 [46] was developed by our research team, including the members of the SPIN Support Group Advisory  
54  
55  
56  
57  
58  
59  
60

1  
2  
3 Team, to measure support group leader self-efficacy for performing leader tasks. Initial items were  
4  
5  
6 obtained from the Group Leader Self-Efficacy Instrument, a 37-item self-report questionnaire  
7  
8  
9 that assesses self-efficacy for performing group leader skills.[47] The Group Leader Self-  
10  
11  
12 Efficacy Instrument is intended for use with group psychotherapy leaders, so many of its  
13  
14  
15 items are not relevant or appropriate for support group leaders. Items from this instrument  
16  
17  
18 were reviewed for relevancy, and relevant items were considered for inclusion, along with  
19  
20  
21 items from a questionnaire intended for leaders of cancer and multiple sclerosis support  
22  
23  
24 groups [48] and items that we generated from the results of a published study on the  
25  
26  
27 experiences of leaders of cancer support groups.[49] All items were then reviewed by members  
28  
29  
30 of our research team to remove items that were repetitive or not relevant for SSc and to generate new  
31  
32  
33 items to reflect important SSc-specific content based on their own experiences or on qualitative  
34  
35  
36 interviews that we conducted with SSc support group leaders (N = 10). Items were then reviewed  
37  
38  
39 iteratively by all members of the research team until a consensus was reached on included items. The  
40  
41  
42 resulting 32-item scale is scored on a 6-point Likert scale from 1 (strongly disagree) to 6 (strongly  
43  
44  
45 agree) with possible total scores from 32 to 192 and higher scores indicating greater self-efficacy. The  
46  
47  
48 SSGLSS was validated in two samples of SSc support group leaders (N = 102, N = 55) and found to  
49  
50  
51 have good internal consistency (Cronbach's alpha 0.96 and 0.95) and hypothesis-consistent convergent  
52  
53  
54 validity with the Oldenburg Burnout Inventory (OLBI). A strength of using the SSGLSS as the  
55  
56  
57 primary outcome measure is that both the intervention and the SSGLSS were designed to  
58  
59  
60 reflect training needs of SSc support group leaders.



1  
2  
3  
4 **Burnout:** Leader burnout was assessed with the OLBI,[50-52] which is a 16-item  
5  
6 measure that assesses exhaustion and disengagement due to burnout. The OLBI was initially  
7  
8 designed for work-related burnout, but has been adapted for numerous settings and in  
9  
10 multiple countries and languages.[52] Our research team revised the wording of each OLBI  
11  
12 item to reflect the support group environment rather than a work environment (e.g., "I find  
13  
14 my work to be a positive challenge" was revised to "I find my role as a support group leader  
15  
16 to be a positive challenge"). The OLBI has a two-factor structure (exhaustion and  
17  
18 disengagement) with good measurement properties.[50-52] Items are scored on a 4-point  
19  
20 scale; higher scores indicate higher levels of exhaustion and disengagement. Internal  
21  
22 consistency reliability (Cronbach's alpha) in patients with SSc was 0.84 for exhaustion and 0.80  
23  
24 for disengagement.[46]

25  
26  
27  
28  
29  
30  
31  
32 **Emotional Distress:** The Patient Health Questionnaire-8 (PHQ-8) was used to assess  
33  
34 emotional distress.[53] The PHQ-8 items measure depressive symptoms over the last 2 weeks  
35  
36 on a 4-point scale, ranging from 0 (not at all) to 3 (nearly every day) with higher scores  
37  
38 indicating more depressive symptoms. The PHQ-8 performs equivalently to the PHQ-9,[53]  
39  
40 which has been shown to be a valid measure of depressive symptoms in patients with  
41  
42 SSc.[54]

43  
44  
45  
46  
47  
48 **Physical Function:** Physical function was measured using the Physical Function subscale of  
49  
50 the 29-item Patient Reported Outcomes Measurement Information System (PROMIS-29) version 2.0.  
51  
52 The PROMIS-29 measures 8 domains of health status with 4 items for each of 7 domains (physical  
53  
54 function, anxiety, depression, fatigue, sleep disturbance, social roles and activities, pain interference)  
55  
56

1  
2  
3 plus a single item for pain intensity. Items are scored on a 5-point scale (range 1-5), with different  
4  
5 response options for different domains, and the single pain intensity item is measured on an 11-point  
6  
7 rating scale. Higher scores represent more of the domain being measured; that is, better physical  
8  
9 function. Total raw scores are obtained by summing item scores for each domain. The PROMIS-29  
10  
11 version 2.0 has been validated in SSc.[55]  
12  
13

14 **Participant Satisfaction:** Satisfaction with the SPIN-SSLED Program was evaluated with the  
15  
16 Client Satisfaction Questionnaire-8 (CSQ-8),[56] a standardised survey that is used to assess  
17  
18 satisfaction with health services. Items are scored on a Likert scale from 1 (low satisfaction) to 4 (high  
19  
20 satisfaction) with total scores ranging from 8 to 32. The CSQ-8 has been widely validated across a  
21  
22 range of populations and health services programs.[57]  
23  
24

25 **Adverse Events:** Following each session, we emailed participants and requested that they report  
26  
27 any concerns that they had about the sessions or their experience in the sessions.  
28  
29

### 30 **Sample size**

31  
32 Guidance on appropriate sample size for feasibility trials varies substantially in the published  
33  
34 literature. For the purposes of establishing feasibility of delivery of the SPIN-SSLED Program, we  
35  
36 determined that conducting two different training groups would allow us to evaluate intervention  
37  
38 content and delivery aspects, and, thus, we sought to recruit a total of 10 participants to conduct two  
39  
40 training groups.  
41  
42

### 43 **Data Analysis**

44  
45 Feasibility outcomes included leader eligibility and recruitment, leader enrolment, and  
46  
47 technological performance of the videoconferencing system. Qualitative information via interviews  
48  
49 and weekly reports by participants was collected, and all suggestions for changes to the program or  
50  
51 trial methods that could be implemented prior to beginning a full-scale trial were recorded. Descriptive  
52  
53  
54  
55  
56  
57  
58  
59  
60

1  
2  
3 statistics were used to provide means and standard deviations for SPIN-SSLED Program outcome  
4  
5 measures. Since the purpose of this feasibility trial was to evaluate feasibility and identify any  
6  
7 modifications to the intervention or trial plan, the trial was not designed or powered to test hypotheses  
8  
9 about outcomes. Thus, consistent with best practices,[33] hypothesis tests were not conducted, but  
10  
11 effect sizes for pre-post differences are shown. Data were analysed using the statistics software  
12  
13 program, IBM SPSS.  
14  
15

### 16 17 **Patient and Public Involvement**

18  
19 The SPIN Support Group Advisory Team has been involved in all stages of SPIN's  
20  
21 research on support groups in SSc, including preliminary research on support groups in SSc,  
22  
23 the development of the SPIN-SSLED program, and the design and implementation of the  
24  
25 feasibility trial. Members of the Team initially participated in the design of the Scleroderma  
26  
27 Support Group Survey, which informed developing of the program by collecting information  
28  
29 on the experiences and training needs of SSc support group leaders, priorities of SSc support  
30  
31 group members, and reasons why people do not attend SSc support groups.[17-20] Team  
32  
33 members participated in the development of the SSGLSS,[46] which was administered in the  
34  
35 feasibility trial and will be the primary outcome for the planned full-scale trial. Team members  
36  
37 provided input into the development of the SPIN-SSLED Program and its modules, filmed the  
38  
39 vignettes used in the program, and were involved in decisions related to the conduct of the feasibility  
40  
41 trial.  
42  
43  
44  
45  
46  
47  
48

## 49 **RESULTS**

### 50 51 **Participant Characteristics**

The trial was conducted between April and July 2018. Scleroderma Canada and the Scleroderma Foundation each provided our team with names of 6 potential participants. All agreed to participate in the program. We initially enrolled 10 participants, but one was hospitalised prior to initiating the program. Thus, prior to starting the trial, we added one participant who had been wait-listed.

All 10 participants were female. The mean age was 58 years (standard deviation [SD] = 11 years). There were 6 participants from Canada and 4 from the United States. All 10 described themselves as White, and one also described herself as Aboriginal. Of the 10 participants, 9 were people with SSc. Mean years since diagnosis among those with SSc was 11 years. Participant characteristics are shown in Table 2.

**Table 2. Participant Characteristics**

| Characteristics                           | N Participants<br>= 10 |
|-------------------------------------------|------------------------|
| Female sex, <i>n</i> (%)                  | 10 (100%)              |
| Age in years, <i>mean</i> ( <i>SD</i> )   | 57.7 (11.1)            |
| Country, <i>n</i> (%)                     |                        |
| Canada <sup>a</sup>                       | 6 (60%)                |
| United States <sup>b</sup>                | 4 (40%)                |
| Race/ethnicity, <sup>c</sup> <i>n</i> (%) |                        |
| White                                     | 10 (100%)              |
| Aboriginal                                | 1 (10%)                |
| Relationship status, <i>n</i> (%)         |                        |
| Married or living as married              | 8 (80%)                |
| Separated or divorced                     | 2 (20%)                |

|                                                       |            |
|-------------------------------------------------------|------------|
| Education in years, <i>mean (SD)</i>                  | 17.5 (2.7) |
| Occupational status, <i>n (%)</i>                     |            |
| Homemaker                                             | 1 (10%)    |
| Part- or full-time employment <sup>b</sup>            | 2 (20%)    |
| Disability                                            | 3 (30%)    |
| Retired                                               | 4 (40%)    |
| SSc diagnosis, <i>n (%)</i>                           |            |
| Limited SSc                                           | 4 (40%)    |
| Diffuse SSc                                           | 5 (50%)    |
| Not diagnosed with SSc                                | 1 (10%)    |
| Years since SSc diagnosis, <i>mean (SD)</i>           | 10.9 (7.4) |
| Current leader of SSc support group                   | 10 (100%)  |
| Years as a SSc support group leader, <i>mean (SD)</i> | 3.6 (3.7)  |

<sup>a</sup> Participants from British Columbia, Manitoba, Ontario, Quebec (2), and Saskatchewan.

<sup>b</sup> Participants from California (3) and Florida.

<sup>c</sup> Participants could select more than one race/ethnicity.

## Feasibility Outcomes

All 10 participants completed all baseline and post-trial measures, including the PEMAT interview. Participant attendance at the weekly sessions was high (95%; 123 of 130 sessions). No sessions were missed or delayed due to technological difficulties, and time for technological support from our team was between 1-2 hours for the entire program. Per the PEMAT interviews and per our observations, the GoToMeeting system worked fluidly and supported the training groups well.

A summary of responses to the PEMAT interviews is shown in Table 3. As can be seen in the table, there were relatively minor suggestions for improving the program. Overall, feedback was

extremely positive. The overall mean grade given by participants for the SPIN-SSLED Program was 9.4/10. No concerns related to adverse events were reported.

**Table 3. Summary of Responses to the Patient Education Materials Assessment Tool for Audiovisual Materials (PEMAT) Interviews**

| PEMAT Item                                                                                                                               | Summary of Responses                                                                     |
|------------------------------------------------------------------------------------------------------------------------------------------|------------------------------------------------------------------------------------------|
| Are you currently a leader of a support group, a co-leader or planning on becoming a support group leader?                               | 4 co-leaders, 5 leaders, 1 plans to become leader.                                       |
| <b>PROCESS</b>                                                                                                                           |                                                                                          |
| Did you find that the weekly frequency of the training sessions was adequate?                                                            | 10 yes.                                                                                  |
| Did you find the length of each training session appropriate?                                                                            | 10 yes; 3 added that grief module was not long enough, 1 said grief module was too long. |
| Was it difficult to find the motivation to attend the training session every week?                                                       | 9 no; 1 sometimes due to scheduling.                                                     |
| <b>PURPOSE</b>                                                                                                                           |                                                                                          |
| Did you understand the objectives of the SPIN-SSLED training program modules?                                                            | 10 yes.                                                                                  |
| Did you find the information provided in the SPIN-SSLED training program relevant?                                                       | 10 yes.                                                                                  |
| <b>WORDS AND LANGUAGE</b>                                                                                                                |                                                                                          |
| Did you find that the content of the program manual was clear, concise and easy to follow?                                               | 10 yes.                                                                                  |
| Did you find that the content delivered in the training sessions and the discussion about the content was easy to understand and useful? | 10 yes.                                                                                  |
| <b>CONTENT AND ORGANISATION</b>                                                                                                          |                                                                                          |
| Did you find that the content of the SPIN-SSLED modules was presented logically and well-organised?                                      | 10 yes.                                                                                  |
| Did you find that the order of the modules was logical and that linkages were clear?                                                     | 9 yes; 1 said that order was “staggered”.                                                |

1  
2  
3 Did you find the discussion among other participants helpful? 10 yes; 1 mentioned that sometimes she had questions and  
4 challenges specific to herself that she didn't have time to get  
5 addressed.

---

### 6 VIDEO VIGNETTES

---

8 Did the fact that the video vignettes scenarios were performed by scleroderma patients make  
9 the program more relatable? 9 yes; 1 had difficulty hearing the videos (participant with  
10 hearing impairment).

11 Were you able to clearly understand the people speaking in the videos? 9 yes; 2 no; 1 indicated there were small things they didn't quite  
12 hear (participant with hearing impairment).

13 Did you develop an understanding of the challenges that could arise in a support group  
14 from watching the videos and obtain useful information or strategies to address them? 8 yes, 2 no (not hearing properly; 1 participant with hearing  
15 impairment).

---

### 20 TECHNOLOGY

---

22 Did you use a computer, phone, tablet or all these devices to access the SPIN-SSLED  
23 Training Program? 7 used computer, 4 used phone, 1 used tablet (> 10 due to >1  
24 method for some participants).

25 Did the initial invitation email provide you with the information you needed to understand  
26 how to log in for the training session? 10 yes.

29 Did you experience any technical difficulties while using GoToMeeting? 8 no; 2 minor.

31 Did you experience any technical difficulties while using Slack chatroom? 7 no; 3 did not use it. Use overall was minimal.

33 Did you use the guide we provided to use GoToMeeting and the Slack chatroom? 5 yes; 5 no.

---

### 38 OVERALL APPRECIATION

---

39 Can you please tell us about your experience with the SPIN-SSLED Training Program,  
40 including things that you liked about the program and things that could be improved?  
41 Positive aspects of program: informative, organised, videos, “Supporting Yourself as a Leader” and “Grief and Crisis”  
42 modules were identified as very important.  
43 Positive aspects of SPIN-SLLED program leader: clear, conscientious, answered questions thoroughly, gave  
44 opportunities for feedback, was available between sessions.  
45 To improve: discuss financial support for support group expenses, expand grief module over 2 sessions, do sessions in  
46 winter instead of summer so that individuals with scleroderma can only enjoy the outdoors in summer, adding more videos.  
47  
48  
49  
50  
51  
52  
53  
54  
55  
56  
57  
58  
59  
60

|                                                                                                                                                                                                  |                                                                                                                                                                   |
|--------------------------------------------------------------------------------------------------------------------------------------------------------------------------------------------------|-------------------------------------------------------------------------------------------------------------------------------------------------------------------|
| <p>1<br/>2<br/>3<br/>4<br/>5<br/>6<br/>7</p> <p>What grade (on a 0-10 scale, 0 being the worst and 10 being the best possible score) would you give the program?<br/>0 (worst) to 10 (best).</p> | <p>5 rated 10, 1 rated 9, 1 rated 9.5, 2 rated 8, 1 rated "9 or 10".</p> <p>Mean score: 9.4/10</p>                                                                |
| <p>8<br/>9<br/>10</p> <p>Would you recommend this program to someone with scleroderma?</p>                                                                                                       | <p>10 yes.</p>                                                                                                                                                    |
| <p>11<br/>12<br/>13<br/>14</p> <p>Is there anything you want to give us feedback about that was not included in this interview?</p>                                                              | <p>The remote support group meetings module was less important to 1 participant. Suggestion to make recordings of support group discussions available online.</p> |

---

### SPIN-SSLED Planned Trial Outcome Measures

Table 4 shows the responses to each of the 32 items of the SSGLSS, which will be the primary outcome measure in the full-scale trial. Pre-training, the mean (SD) was 124.4 (22.0), which was similar to the scores of our two international samples from the SSGLSS validation study (N = 102, mean SSGLSS = 122.9 (21.7); N = 55, mean SSGLSS = 123.9 (19.4)). Post-training, the mean total score increased to 159.2 (17.1). The standardised mean difference effect size was 1.70, which is considered a large effect size.[58] SSGLSS items are scored on a 1-6 scale, and the average item score increase pre-post training was 1.1 points.



**Table 4. Pre- and Post- Intervention Item and Total Scores for the Scleroderma Support Group Leader Self-efficacy Scale:**

Possible item scores range from 1 to 6 with higher scores reflecting greater self-efficacy

| Items                                                                                                                 | Pre-Trial N | Pre-Trial Mean (SD) | Post-Trial N | Post-Trial Mean (SD) | Standardised Mean Difference Effect Size (95% confidence interval – total only) |
|-----------------------------------------------------------------------------------------------------------------------|-------------|---------------------|--------------|----------------------|---------------------------------------------------------------------------------|
| 1. Obtain financial or other resources needed to run the group                                                        | 10          | 3.5 (1.7)           | 10           | 4.8 (1.2)            | 0.61                                                                            |
| 2. Promote the group to health professionals as an important resource for patients                                    | 10          | 4.5 (0.7)           | 10           | 5.4 (0.7)            | 1.80                                                                            |
| 3. Share responsibilities, including administrative and practical tasks, with a co-facilitator or other group members | 10          | 4.8 (1.6)           | 10           | 5.5 (0.5)            | 0.52                                                                            |
| 4. Manage group members who are overly talkative or monopolize the discussion                                         | 10          | 3.9 (1.1)           | 10           | 4.8 (0.6)            | 1.13                                                                            |
| 5. Manage group members who assume the role of the "know-it-all"                                                      | 10          | 3.9 (1.1)           | 10           | 4.6 (0.8)            | 0.73                                                                            |
| 6. Support members of the group who are grieving                                                                      | 10          | 3.3 (1.5)           | 10           | 4.7 (0.8)            | 0.97                                                                            |
| 7. Help overly shy group members feel comfortable interacting with the group                                          | 10          | 3.9 (1.1)           | 10           | 4.9 (0.7)            | 1.14                                                                            |
| 8. Help group members cope with difficult events, such as the death of a member                                       | 10          | 3.0 (1.8)           | 10           | 4.7 (0.8)            | 0.90                                                                            |
| 9. Effectively recruit new members                                                                                    | 10          | 3.5 (1.4)           | 10           | 4.9 (0.7)            | 1.18                                                                            |
| 10. Address the different needs of groups members at varying stages of the disease                                    | 10          | 3.7 (1.6)           | 10           | 4.8 (0.6)            | 0.77                                                                            |
| 11. Manage conflicts and disagreements between group members                                                          | 10          | 3.3 (1.4)           | 10           | 4.5 (0.7)            | 0.95                                                                            |
| 12. Help the group establish appropriate group rules, such as maintaining confidentiality                             | 10          | 4.3 (1.1)           | 10           | 5.8 (0.4)            | 2.31                                                                            |
| 13. Effectively publicize the group                                                                                   | 10          | 3.5 (1.1)           | 10           | 5.1 (0.7)            | 1.86                                                                            |
| 14. Intervene effectively when group rules are not being followed                                                     | 10          | 4.0 (1.1)           | 10           | 5.0 (0.7)            | 1.30                                                                            |
| 15. Obtain the support I need to cope with the emotional demands of leading the group                                 | 10          | 2.9 (1.2)           | 10           | 4.9 (1.0)            | 1.65                                                                            |
| 16. Respond constructively to feedback from group members                                                             | 10          | 4.6 (0.8)           | 10           | 5.3 (0.8)            | 1.01                                                                            |
| 17. Help group members relate to other members of a different age                                                     | 10          | 4.1 (1.0)           | 10           | 5.1 (0.7)            | 1.30                                                                            |
| 18. Provide the structure needed for successful meetings                                                              | 10          | 5 (0.9)             | 10           | 5.6 (0.5)            | 1.03                                                                            |
| 19. Keep the group meetings interesting and relevant to both new and returning members                                | 10          | 4.2 (0.9)           | 10           | 5.2 (0.8)            | 1.35                                                                            |

|                                                                                                 |    |              |    |              |                   |
|-------------------------------------------------------------------------------------------------|----|--------------|----|--------------|-------------------|
| 20. Manage group members who oversimplify or minimize the concerns of other members             | 10 | 3.5 (1.4)    | 10 | 4.9 (0.9)    | 0.99              |
| 21. Facilitate the group meetings so that all members have an opportunity to speak              | 10 | 4.6 (0.8)    | 10 | 5.1 (0.9)    | 0.68              |
| 22. Help the group stay focused on topics that are relevant to members                          | 10 | 4.4 (0.7)    | 10 | 5.3 (0.7)    | 1.88              |
| 23. Obtain feedback from members about the group                                                | 10 | 4.3 (0.8)    | 10 | 5.0 (0.8)    | 1.04              |
| 24. Organise and plan activities for group members, such as having guest speakers               | 10 | 4.5 (1.4)    | 10 | 5.5 (0.7)    | 0.86              |
| 25. Help members feel comfortable in the group and relate to one another                        | 10 | 4.4 (0.8)    | 10 | 5.2 (0.6)    | 1.43              |
| 26. Obtain feedback from members about my leadership                                            | 10 | 3.6 (0.7)    | 10 | 4.8 (0.9)    | 1.79              |
| 27. Help group members relate to other members of a different cultural background               | 10 | 3.9 (1.2)    | 10 | 4.5 (1.0)    | 0.50              |
| 28. Communicate reasonable boundaries about my availability outside of the group                | 10 | 3.7 (1.3)    | 10 | 4.5 (1.0)    | 0.64              |
| 29. Talk to a group member about her or his behaviour if it is disruptive to the group          | 10 | 2.7 (1.3)    | 10 | 4.5 (0.9)    | 1.58              |
| 30. Ask a member to leave the group due to her or his disruptive behaviour                      | 10 | 1.6 (1.0)    | 10 | 4.2 (1.1)    | 2.32              |
| 31. Help group members relate to other members of a different gender                            | 10 | 4.4 (1.1)    | 10 | 5.0 (0.8)    | 0.65              |
| 32. Recruit a co-facilitator or other group members to help me with leadership responsibilities | 10 | 4.9 (1.3)    | 10 | 5.1 (0.9)    | 0.16              |
| <b>Total Score (Possible Range 32 to 192)</b>                                                   | 10 | 124.4 (22.0) | 10 | 159.2 (17.0) | 1.70 (0.67, 2.72) |

Table 5 shows results for health outcomes, including burnout (OLBI), emotional distress (PHQ-8), and physical function (PROMIS-29). For all of these outcomes, the standardised mean difference effect size of post-trial score improvement was between 0.38 and 0.45, which are typically considered small to moderate effect sizes.[58]

**Table 5. Pre- and Post- Intervention Total Scores for Secondary Outcome Measures**

| Measure                                                                            | Pre-Trial N | Pre-Trial Mean (SD) | Post-Trial N | Post-Trial Mean (SD) | Standardised Mean Difference Effect Size (95% confidence interval) |
|------------------------------------------------------------------------------------|-------------|---------------------|--------------|----------------------|--------------------------------------------------------------------|
| Oldenburg Burnout Inventory<br>(higher scores = greater burnout)                   | 10          | 33.2 (4.6)          | 10           | 31.0 (4.9)           | 0.44 (-0.44, 1.33)                                                 |
| Patient Health Questionnaire-8<br>(higher scores = greater symptoms of depression) | 10          | 10.8 (2.7)          | 10           | 9.8 (2.4)            | 0.38 (-0.50, 1.27)                                                 |
| PROMIS-29 Physical Function<br>(higher raw scores = greater function)              | 10          | 17.1 (2.2)          | 10           | 18.2 (2.4)           | 0.45 (-0.42, 1.36)                                                 |

As shown in Table 6, the mean post-training score on the CSQ-8 was 30.6 (2.2). On a per item basis, the mean item score (possible range 1-4) was 3.8, reflecting a very high level of satisfaction with the experience of trainees with the SPIN-SSLED Program.

**Table 6. Post-Intervention Items, Frequencies, and Total Scores for the Client Satisfaction Questionnaire-8: Item response options very across items, but all scored 1-4**

| Items                                                         | 1 Point (Dissatisfied) n (%) | 2 Points (Mildly Satisfied) n (%) | 3 Points (Mostly Satisfied) n (%) | 4 Points (Quite Satisfied) n (%) | Item Mean (SD) |
|---------------------------------------------------------------|------------------------------|-----------------------------------|-----------------------------------|----------------------------------|----------------|
| 1. How would you rate the quality of the SPIN-SSLED training? | 0 (0%)                       | 0 (0%)                            | 1 (10%)                           | 9 (90%)                          | 3.9 (0.3)      |

|                                                                                                         |        |        |         |           |           |
|---------------------------------------------------------------------------------------------------------|--------|--------|---------|-----------|-----------|
| 2. Did the SPIN-SSLED program provide you the kind of training you wanted?                              | 0 (0%) | 0 (0%) | 2 (20%) | 8 (80%)   | 3.8 (0.4) |
| 3. To what extent has the SPIN-SSLED training met your needs?                                           | 0 (0%) | 0 (0%) | 4 (40%) | 6 (60%)   | 3.6 (0.5) |
| 4. If a friend were in need of similar training, would you recommend the SPIN-SSLED program to him/her? | 0 (0%) | 0 (0%) | 2 (20%) | 8 (80%)   | 3.8 (0.4) |
| 5. How satisfied are you with the amount of training you received from the SPIN-SSLED program?          | 0 (0%) | 0 (0%) | 2 (20%) | 8 (80%)   | 3.8 (0.4) |
| 6. Has the SPIN-SSLED training helped you to deal more effectively with your support group leader role? | 0 (0%) | 0 (0%) | 0 (10%) | 10 (100%) | 4.0 (0.0) |
| 7. In an overall, general sense, how satisfied are you with the SPIN-SSLED training?                    | 0 (0%) | 0 (0%) | 1 (20%) | 9 (90%)   | 3.9 (0.3) |
| 8. If you were to seek help again, would you come back to the SPIN-SSLED training?                      | 0 (0%) | 0 (0%) | 2 (20%) | 8 (80%)   | 3.8 (0.4) |

---

**Total Score**  
**(Possible Range 8 to 32)** 30.6 (2.2)

---

## DISCUSSION

Feasibility of delivering the SPIN-SSLED Program in the context of a trial, participant satisfaction, and program content were evaluated in the SPIN-SSLED feasibility trial. Results

1  
2  
3 informed revisions to the content of the program and provided confidence that the program can be  
4 effectively and efficiently delivered in a full-scale trial.  
5  
6

7  
8 With respect to overall experience with the program and program content, participants reported  
9 that the content was clear and well-organised. Overall satisfaction with their experience in the SPIN-  
10 SSLED Program was rated as 9.4 out of 10 on average. Participant satisfaction was similarly high  
11 when evaluated with the 8 items of the CSQ. Several participants encouraged the research team to  
12 expand on the single module related to grief. Based on comments and follow-up discussions with  
13 participants, the program was revised to include two modules on grief, including one module on grief  
14 and loss that leaders have experienced because they or somebody close to them has been diagnosed  
15 with SSc and a second module on providing support to group members who are struggling with grief  
16 and loss. In order to add a second module on grief and loss, the two modules on managing group  
17 dynamics were reduced to a single module. To facilitate this, rather than viewing all of the short video  
18 vignettes included in those modules as part of the training sessions, participants suggested that they  
19 could view the vignettes prior to the sessions and then suggest specific modules for review and  
20 discussion in the training sessions.  
21  
22  
23  
24  
25  
26  
27  
28  
29  
30  
31  
32  
33  
34  
35  
36

37  
38 With respect to program delivery, participants indicated that they were able to access the  
39 sessions via the GoToMeeting platform and did not experience any technical difficulties that  
40 interrupted their training sessions. One difficulty that was reported involved a participant with a  
41 hearing impairment who was unable to hear all of the vignette videos well. This information will help  
42 us to assess for reasons why participants may need additional support in the full-scale trial and will  
43 allow us to make accommodations. In the full-scale trial, we will assess for hearing and any other  
44 impairments that might limit participation, and we will seek appropriate assistance to be able to  
45 provide adaptations to meet participant needs. From a management standpoint, total time for technical  
46  
47  
48  
49  
50  
51  
52  
53  
54  
55  
56  
57  
58  
59  
60

1  
2  
3 support due to access difficulties across the trial period for the two groups was between 1-2 hours.  
4  
5 Participants attended 95% of sessions, and all 10 participants completed all baseline and post-trial  
6  
7 outcome assessments.  
8  
9

10       There were limitations that should be considered in evaluating the results of the SPIN-SSLED  
11 feasibility trial. First, we were provided with a small list of potential participants from our patient  
12 organisation partners, and it is possible that these support group leaders were more motivated or  
13  
14 otherwise more likely to participate and engage than the leaders who will participate in the full-scale  
15  
16 trial. Second, we did not randomise participants to the intervention and to a wait-list control group as  
17  
18 we will do in the planned full-scale trial. Third, we only conducted 2 training groups and only included  
19  
20 a total of 10 participants. The reason for not using a control group and limiting the feasibility trial to 2  
21  
22 groups is that there is a finite number of English- and French-speaking SSc support group leaders, and  
23  
24 we wanted to be able to assess feasibility aspects but maximize the number of participants eligible for  
25  
26 the full-scale trial. It is possible that the pre-selection of potential participants and the lack of the  
27  
28 possibility of randomised assignment to a non-intervention group may have resulted in over-estimation  
29  
30 of the percentage of participants who will enrol in the full-scale trial and the degree to which they will  
31  
32 actively participate. Given the small number of French-speaking leaders available for the full-scale  
33  
34 trial, we did not include a French group in the feasibility trial. However, all measures have been used  
35  
36 successfully previously with French-speaking research participants. Finally, the trial only included  
37  
38 leaders of SSc support groups, and this may limit generalisability to other patient populations, but it  
39  
40 will be useful to inform our planned full-scale trial of the SPIN-SSLED Program.  
41  
42  
43  
44  
45  
46  
47  
48

49       There are no existing training programs for SSc support group leaders, and a systematic review  
50 did not identify any training or education programs that have been demonstrated to be effective for  
51  
52 support group leaders in any medical condition.[31] The planned full-scale SPIN-SSLED trial, which  
53  
54  
55  
56  
57  
58  
59  
60

1  
2  
3 was recently funded by the Canadian Institutes of Health Research, is scheduled to begin in 2019  
4  
5 ([http://webapps.cihr-irsc.gc.ca/decisions/p/project\\_details.html?applId=388187&lang=en](http://webapps.cihr-irsc.gc.ca/decisions/p/project_details.html?applId=388187&lang=en)). It will be a  
6  
7 pragmatic RCT that will test whether providing the SPIN-SSLED Program to leaders of SSc support  
8  
9 groups will improve outcomes compared to leaders assigned to a wait-list control. Pragmatic RCTs  
10  
11 differ from explanatory or mechanistic trials in that they are intended to test the effectiveness of adding  
12  
13 an intervention to routine practice in order to inform practice and policy decisions rather than explain  
14  
15 intervention mechanisms.[59, 60] SSc support group leaders who are enrolled will be randomly  
16  
17 allocated to the training program or a wait-list control, and those allocated to training will be clustered  
18  
19 in training groups where they will interact with each other. To account for clustering in the training  
20  
21 arm, but not the control arm, we will use a partially nested RCT trial design (PN-RCT).[61-63] The  
22  
23 PN-RCT design is a hybrid between a conventional RCT, in which individual participants are  
24  
25 randomised, and a cluster RCT, in which pre-existing clusters (e.g., primary care practices,  
26  
27 classrooms) are randomised to intervention or control arms. In the PN-RCT design, analyses account  
28  
29 for dependence within intervention arm clusters, but treat leaders assigned to the control arm  
30  
31 individually, as in a conventional RCT. Participants will be existing support group leaders or new  
32  
33 leaders referred by Scleroderma Canada (English) or Sclérodermie Québec (French), the Scleroderma  
34  
35 Foundation (USA), Scleroderma & Raynaud's UK, the Scleroderma Association of New South Wales  
36  
37 (Australia), and Scleroderma New Zealand.

38  
39  
40  
41  
42  
43  
44 In sum, the SPIN-SSLED feasibility trial ensured that trial methodology was feasibly  
45  
46 implemented and that the online intervention was user-friendly and acceptable to participants.  
47  
48 Participants provided suggestions for adjustments to content that will be implemented before  
49  
50 undertaking a full-scale RCT of the SPIN-SSLED program to assess effectiveness.  
51  
52  
53  
54  
55  
56  
57  
58  
59  
60

## **AUTHORS CONTRIBUTIONS**

BDT, VLM, GE-B, SP, MS, MH, and RWP were responsible for the study conception and design. BDT, LD, MP, KA, MEC, LT, and SH were responsible for implementation of the trial or acquisition, analysis, and interpretation of trial data. BDT drafted the manuscript. All authors provided a critical review and approved the final manuscript. BDT is the guarantor.

## **ACKNOWLEDGEMENTS**

Not applicable.

## **FUNDING STATEMENT**

Funding from the Scleroderma Society of Ontario and the Canadian Institutes of Health Research (PJT-156429) was used for development of the SPIN-SSLED Program and preliminary research. The trial was funded by the Canadian Initiative for Outcomes in Rheumatology cAre. Dr. Thombs was supported by a Fonds de Recherche Québec - Santé (FRQS) researcher award outside of the present work. Dr. Platt holds the Albert Boehringer I Chair in Pharmacoepidemiology. No sponsor or funder was involved in the study design; in the collection, analysis and interpretation of the data; in the writing of the report; or in the decision to submit the paper for publication.

## **COMPETING INTERESTS STATEMENT**

All authors have completed the ICMJE uniform disclosure form at [www.icmje.org/coi\\_disclosure.pdf](http://www.icmje.org/coi_disclosure.pdf) and declare that they have no competing interests.

## **DATA SHARING STATEMENT**

All data extracted and analysed for the present study are available from the corresponding author.



## REFERENCES

1. Kralik D. The quest for ordinariness: transition experienced by midlife women living with chronic illness. *J Adv Nurs* 2002;39:146-154.
2. Karasz A, Ouellette SC. Role strain and psychological well-being in women with systemic lupus erythematosus. *Women Health* 1995;23:41-57.
3. Kole A, Faurisson F. The voice of 12,000 patients: experiences and expectations of rare disease patients on diagnosis and care in Europe. 2009. [http://www.eurordis.org/IMG/pdf/voice\\_12000\\_patients/EURORDISCARE\\_FULLBOOKr.pdf](http://www.eurordis.org/IMG/pdf/voice_12000_patients/EURORDISCARE_FULLBOOKr.pdf). Accessed February 10, 2019.
4. European Organisation for Rare Diseases. Rare diseases: understanding this public health priority. 2005. [http://www.eurordis.org/IMG/pdf/princeps\\_document-EN.pdf](http://www.eurordis.org/IMG/pdf/princeps_document-EN.pdf). Accessed February 10, 2019.
5. Cohen JS, Biesecker BB. Quality of life in rare genetic conditions: a systematic review of the literature. *Am J Med Genet A* 2010;152:1136-56.
6. Huyard C. What, if anything, is specific about having a rare disorder? Patients' judgements on being ill and being rare. *Health Expect* 2009;12:361-70.
7. Nettleton S, Watt I, O'Malley L, et al. Understanding the narratives of people who live with medically unexplained illness. *Patient Educ Couns* 2005;56:205-21.

- 1  
2  
3 8. Van Walsem MR, Howe EI, Iversen K, Frich JC, Andelic N. Unmet needs for healthcare and  
4  
5  
6 social support services in patients with Huntington's disease: a cross-sectional  
7  
8  
9 population-based study. *Orphanet J Rare Dis* 2015;10:124.  
10
- 11 9. Anderson M, Elliott EJ, Zurynski YA. Australian families living with a rare disease:  
12  
13  
14 experiences of diagnosis, health services use and needs for psychosocial support.  
15  
16  
17 *Orphanet J Rare Dis* 2013;8:22.  
18
- 19 10. Dwyer AA, Quinton R, Morin D, Pitteloud N. Identifying the unmet health needs of  
20  
21  
22 patients with congenital hypogonadotropic hypogonadism using a web-based needs  
23  
24  
25 assessment: implications for online interventions and peer-to-peer support. *Orphanet J*  
26  
27  
28 *Rare Dis* 2014;9:83.  
29
- 30 11. Kasparian NA, Rutstein A, Sansom-Daly UM, et al. Through the looking glass: an  
31  
32  
33 exploratory study of the lived experiences and unmet needs of families affected by Von  
34  
35  
36 Hippel-Lindau disease. *Eur J Hum Genet* 2015;23:34-40.  
37
- 38 12. Holtzclaw Williams P. Policy framework for rare disease health disparities. *Policy Polit Nurs*  
39  
40  
41 *Pract* 2011;12:114-118.  
42
- 43 13. Newman S, Steed L, Mulligan K. Self-management interventions for chronic illness. *Lancet*  
44  
45  
46 2004;364:1523-1537.  
47
- 48 14. Davison KP, Pennebaker JW, Dickerson SS. Who talks? The social psychology of illness  
49  
50  
51 support groups. *Am Psychol* 2000;55:205-217.  
52  
53  
54  
55  
56  
57  
58  
59

- 1  
2  
3 15. Kwakkenbos L, Jewett LR, Baron M, et al. The Scleroderma Patient-centered Intervention  
4  
5 Network (SPIN): protocol for a cohort multiple randomised controlled trial (cmRCT)  
6  
7 design to support trials of psychosocial and rehabilitation interventions in a rare disease  
8  
9 context. *BMJ Open* 2013;3:eoo3563.  
10  
11
- 12  
13 16. Reimann A, Bend J, Dembski B. [Patient-centred care in rare diseases. A patient  
14  
15 organisations' perspective]. *Bundesgesundheitsblatt Gesundheitsforschung*  
16  
17 *Gesundheitsschutz* 2007;50:1484-1493.  
18  
19
- 20  
21 17. Gumuchian ST, Delisle VC, Kwakkenbos L, et al. Reasons for attending support groups and  
22  
23 organisational preferences: the European scleroderma support group members survey.  
24  
25 *Disabil Rehabil* 2017;19:1-9.  
26  
27
- 28  
29 18. Delisle VC, Gumuchian ST, Peláez S, et al. Reasons for non-participation in scleroderma  
30  
31 support groups. *Clin Exp Rheumatol* 2016;34:56-62.  
32  
33
- 34  
35 19. Gumuchian ST, Delisle VC, Peláez S, et al. Reasons for not participating in scleroderma  
36  
37 patient support groups: a cross-sectional study. *Arthritis Care Res* 2018;70:275-283.  
38  
39
- 40  
41 20. Delisle VC, Gumuchian ST, El-Baalbaki G, et al. Training and support needs of scleroderma  
42  
43 support group facilitators: the North American Scleroderma Support Group Facilitators  
44  
45 Survey. *Disabil Rehabil* 2018;25:1-6.  
46  
47
- 48  
49 21. Aymé S, Kole A, Groft S. Empowerment of patients: lessons from the rare diseases  
50  
51 community. *Lancet* 2008;371:2048-2051.  
52  
53  
54  
55  
56  
57  
58  
59

- 1  
2  
3  
4 22. Barg FK, Gullatte MM. Cancer support groups: Meeting the needs of African Americans  
5  
6 with cancer. *Semin Oncol Nurs* 2001;17:171-178.  
7  
8  
9 23. Seibold J. Scleroderma. In Harris ED, Budd RC, Firestein GS, et al, editors. Kelly's Textbook  
10  
11 of Rheumatology. Philadelphia: *Elsevier*; 2005. pp. 1279-1308.  
12  
13  
14 24. Mayes M. Systemic sclerosis: clinical features. In Klippel JH, Stone JH, Crafford LJ, White  
15  
16 PH, editors. *Primer on the Rheumatic Diseases*. 13<sup>th</sup> ed. New York: Springer and Arthritis  
17  
18 Foundation; 2008: pp. 343-350.  
19  
20  
21 25. Wigley FM, Hummers LK. Clinical features of systemic sclerosis. In: Hochberg MC, Silman,  
22  
23 A.J., Smolen, J.S., Weinblatt ME, Weismann WH, eds. *Rheumatology*. 3rd ed. Philadelphia:  
24  
25 *Mosby*; 2003:1463-1480.  
26  
27  
28  
29 26. Kwakkenbos L, Delisle VC, Fox RS, et al. Psychosocial aspects of scleroderma. *Rheum Dis*  
30  
31 *Clin North Am* 2015;41:519-528.  
32  
33  
34  
35 27. Scleroderma Canada. Find a support group. [www.scleroderma.ca/Support/Find-A-](http://www.scleroderma.ca/Support/Find-A-Support-Group.php)  
36  
37 [Support-Group.php](http://www.scleroderma.ca/Support/Find-A-Support-Group.php). Accessed February 10, 2019.  
38  
39  
40 28. Scleroderma Foundation. Support groups.  
41  
42 [www.scleroderma.org/site/PageServer?pagename=patients\\_supportgroups#.Vbec7RZvdF](http://www.scleroderma.org/site/PageServer?pagename=patients_supportgroups#.Vbec7RZvdFw)  
43  
44 [w](http://www.scleroderma.org/site/PageServer?pagename=patients_supportgroups#.Vbec7RZvdFw). Accessed February 10, 2019.  
45  
46  
47  
48 29. Scleroderma & Raynaud's UK. Find support. [www.sruk.co.uk/find-support/](http://www.sruk.co.uk/find-support/). Accessed  
49  
50  
51 February 10, 2019.  
52  
53  
54  
55  
56  
57  
58  
59  
60

- 1  
2  
3  
4 30. Scleroderma Association of New South Wales. Regional support groups.  
5  
6 www.sclerodermansw.org/regional-support-groups. Accessed February 10, 2019.  
7  
8  
9 31. Delisle VC, Gumuchian ST, Kloda LA, et al. The effect of support group peer facilitator  
10  
11 training programs on peer-facilitator and support group member outcomes: a systematic  
12  
13 review. *BMJ Open* 2016;6:e013325.  
14  
15  
16 32. Zordan R, Butow P, Kirsten L et al. Supporting the supporters: a randomised controlled  
17  
18 trial of interventions to assist the leaders of cancer support groups. *J Community Psychol*  
19  
20 2015;43:261–77.  
21  
22  
23  
24 33. Eldridge SM, Chan CL, Campbell MJ, et al. CONSORT 2010 statement: extension to pilot  
25  
26 and feasibility trials. *BMJ* 2016;355:i5239.  
27  
28  
29  
30 34. Boud D, Feletti G. The challenge of problem-based learning (2<sup>nd</sup> ed). London: Kogan Page; 1997.  
31  
32  
33 35. Duch BJ, Groh SE, Allen DE. Why problem-based learning? A case study of institutional change  
34  
35 in undergraduate education. In Duch BJ, Groh SE, Allen DE, editors. The power or problem-based  
36  
37 learning (pp. 3-11). Sterling, VA: Stylus; 2001.  
38  
39 36. Hmelo-Silver CE. Problem-based learning: What and how do students learn? *Educ Psychol Rev*  
40  
41 2004;16:235-266.  
42  
43  
44 37. Torp L, Sage S. Problems as possibilities: Problem-based learning for K-16 education (2<sup>nd</sup> ed).  
45  
46 Alexandria, VA: Association for Supervision and Curriculum Development; 2002.  
47  
48 38. Hay-Hansson AW, Eldevik S. Training discrete trials teaching skills using videoconference. *Res*  
49  
50 *Autism Spect Disord* 2013;7:1300-1309.  
51  
52  
53 39. Seibert DC, Guthrie JT, Adamo G. Improving learning outcomes: Integration of standardized  
54  
55 patients & telemedicine technology. *Nurs Educ Perspect* 2004;25:232-237.  
56  
57  
58  
59

- 1  
2  
3 40. Xavier K. Clinical supervision and education via videoconference: a feasibility project. *J Telemed*  
4  
5 *Telecare* 2007;13:206-209.  
6  
7  
8 41. Marziali E, Donahue P. Caring for others: internet video-conferencing group intervention for  
9  
10 family caregivers of older adults with neurodegenerative disease. *Gerontologist* 2006;46:398-403.  
11  
12 42. Fisher WW, Luczynski KC, Hood SA, et al. Preliminary findings of a randomised clinical trial of  
13  
14 a virtual training program for applied behavior analysis technicians. *Res Autism Spect Disord*  
15  
16 2014;8:1044-1054.  
17  
18  
19 43. Hommel KA, Gray WN, Hente E, et al. The Telehealth Enhancement of Adherence to Medication  
20  
21 (TEAM) in pediatric IBD trial: Design and methodology. *Contemp Clin Trials* 2015;43:105-113.  
22  
23  
24 44. Williams LK, McCarthy MC, Burke K, Anderson V, Rinehart N. Addressing behavioral impacts  
25  
26 of childhood leukemia: A feasibility pilot randomised controlled trial of a group  
27  
28 videoconferencing parenting intervention. *Eur J Oncol N* 2016;24:61-69.  
29  
30  
31 45. Shoemaker SJ, Wolf MS, Brach C. Development of the Patient Education Materials Assessment  
32  
33 Tool (PEMAT): a new measure of understandability and actionability for print and audiovisual  
34  
35 and patient information. *Patient Educ Couns* 2014;96:395-403.  
36  
37  
38 46. Pal NE, Gumuchian ST, Delisle VC, et al. Development and preliminary validation of the  
39  
40 Scleroderma Support Group Leader Self-efficacy Scale. *J Scleroderma Relat Disord* 2018;3:106-  
41  
42 111.  
43  
44  
45 47. Page BJ, Pietrzak DR, Lewis TF. Development of the group leader self-efficacy instrument.  
46  
47  
48 *J Spec Group Work* 2001; 26:168-84.  
49  
50  
51 48. Zordan RD, Juraskova I, Butow PN, et al. Exploring the impact of training on the  
52  
53 experience of Australian support group leaders: current practices and implications for  
54  
55 research. *Health Expect* 2010;13:427-440.  
56  
57  
58  
59  
60

- 1  
2  
3 49. Butow PN, Ussher J, Kirsten L, et al. Sustaining leaders of cancer support groups: the role,  
4  
5 needs, and difficulties of leaders. *Soc Work Health Care* 2005;42:39-55.  
6  
7  
8 50. Demerouti E, Bakker AB, Vardakou I, Kantas A. The convergent validity of two burnout  
9  
10 instruments: a multitrait-multimethod analysis. *Eur J Psychol Assess* 2002;18:296-307.  
11  
12  
13 51. Halbesleben JRB, Demerouti E. The construct validity of an alternative measure of burnout:  
14  
15 Investigating the English translation of the Oldenburg Burnout Inventory. *Work Stress*  
16  
17 2005;19:208-220.  
18  
19  
20 52. Reis D, Xanthopoulou D, Tsaousis I. Measuring job and academic burnout with the  
21  
22 Oldenburg Burnout Inventory (OLBI): factorial invariance across countries and samples.  
23  
24  
25  
26  
27 *Burn Res* 2015;2:8-18.  
28  
29 53. Kroenke K, Strine TW, Spitzer RL, et al. The PHQ-8 as a measure of current depression in  
30  
31 the general population. *J Affect Disord* 2009;114:163-173.  
32  
33  
34 54. Milette K, Hudson M, Baron M, et al. Comparison of the PHQ-9 and CES-D depression  
35  
36 scales in systemic sclerosis: internal consistency reliability, convergent validity and clinical  
37  
38  
39  
40  
41  
42  
43 55. Kwakkenbos L, Thombs BD, Khanna D, et al. Performance of the Patient-Reported Outcomes  
44  
45 Measurement Information System-29 (PROMIS-29) in scleroderma: a Scleroderma Patient-  
46  
47  
48 centered Intervention Network (SPIN) Cohort Study. *Rheumatology* 2017;56:1302-1311.  
49  
50 56. Larsen DL, Attkisson CC, Hargreaves WA, Nguyen TD. Assessment of client/patient satisfaction:  
51  
52 development of a general scale. *Eval Program Plann* 1979;2:197-207.  
53  
54  
55  
56  
57  
58  
59  
60

- 1  
2  
3 57. Kelly PJ, Kyngdon F, Ingram I, et al. The Client Satisfaction Questionnaire-8: Psychometric  
4 properties in a cross-sectional survey of people attending residential substance abuse treatment.  
5  
6 *Drug Alcohol Rev* 2018;37:79-86.  
7  
8  
9  
10 58. Cohen, J. *Statistical Power Analysis for the Behavioral Sciences, 2<sup>nd</sup> Edition*. Hillsdale, N.J.:  
11 Lawrence Erlbaum; 1988.  
12  
13  
14 59. Zwarenstein M, Treweek S, Gagnier JJ, et al. Improving the reporting of pragmatic trials: an  
15 extension of the CONSORT statement. *BMJ* 2008;337:a2390.  
16  
17  
18  
19 60. Roland M, Torgerson DJ. Understanding controlled trials: What are pragmatic trials? *BMJ*  
20 1998;316:285.  
21  
22  
23  
24 61. Lohr S, Schochet PZ, Sanders E. Partially nested randomised controlled trials in educational  
25 research: a guide to design and analysis. NCER 2014-2000. Washington, DC: National Center for  
26 Education Research; 2014.  
27  
28  
29  
30 62. Bauer DJ, Sterba SK, Hallfors DD. Evaluating group-based interventions when control  
31 participants are ungrouped. *Multivar Behav Res* 2008;43:210-236.  
32  
33  
34  
35 63. Schweig JD, Pane JF. Intention-to-treat analysis in partially nested randomised controlled trials  
36 with real-world complexity. *Int J of Res Meth Educ* 2016;39:268-286.  
37  
38  
39  
40  
41  
42  
43  
44  
45  
46  
47  
48  
49  
50  
51  
52  
53  
54  
55  
56  
57  
58  
59  
60





## CONSORT 2010 checklist of information to include when reporting a pilot or feasibility trial\*

| Section/Topic                    | Item No | Checklist item                                                                                                                                                                              | Reported on page No |
|----------------------------------|---------|---------------------------------------------------------------------------------------------------------------------------------------------------------------------------------------------|---------------------|
| <b>Title and abstract</b>        |         |                                                                                                                                                                                             |                     |
|                                  | 1a      | Identification as a pilot or feasibility randomised trial in the title                                                                                                                      | 1                   |
|                                  | 1b      | Structured summary of pilot trial design, methods, results, and conclusions (for specific guidance see CONSORT abstract extension for pilot trials)                                         | 3-4                 |
| <b>Introduction</b>              |         |                                                                                                                                                                                             |                     |
| Background and objectives        | 2a      | Scientific background and explanation of rationale for future definitive trial, and reasons for randomised pilot trial                                                                      | 6                   |
|                                  | 2b      | Specific objectives or research questions for pilot trial                                                                                                                                   | 7                   |
| <b>Methods</b>                   |         |                                                                                                                                                                                             |                     |
| Trial design                     | 3a      | Description of pilot trial design (such as parallel, factorial) including allocation ratio                                                                                                  | 7                   |
|                                  | 3b      | Important changes to methods after pilot trial commencement (such as eligibility criteria), with reasons                                                                                    | 7                   |
| Participants                     | 4a      | Eligibility criteria for participants                                                                                                                                                       | 7-8                 |
|                                  | 4b      | Settings and locations where the data were collected                                                                                                                                        | 8                   |
|                                  | 4c      | How participants were identified and consented                                                                                                                                              | 8                   |
| Interventions                    | 5       | The interventions for each group with sufficient details to allow replication, including how and when they were actually administered                                                       | 9-10                |
| Outcomes                         | 6a      | Completely defined prespecified assessments or measurements to address each pilot trial objective specified in 2b, including how and when they were assessed                                | 11-13               |
|                                  | 6b      | Any changes to pilot trial assessments or measurements after the pilot trial commenced, with reasons                                                                                        | 7                   |
|                                  | 6c      | If applicable, prespecified criteria used to judge whether, or how, to proceed with future definitive trial                                                                                 | NA                  |
| Sample size                      | 7a      | Rationale for numbers in the pilot trial                                                                                                                                                    | 13                  |
|                                  | 7b      | When applicable, explanation of any interim analyses and stopping guidelines                                                                                                                | NA                  |
| Randomisation:                   |         |                                                                                                                                                                                             |                     |
| Sequence generation              | 8a      | Method used to generate the random allocation sequence                                                                                                                                      | NA                  |
|                                  | 8b      | Type of randomisation(s); details of any restriction (such as blocking and block size)                                                                                                      | NA                  |
| Allocation concealment mechanism | 9       | Mechanism used to implement the random allocation sequence (such as sequentially numbered containers), describing any steps taken to conceal the sequence until interventions were assigned | NA                  |

|                                                      |     |                                                                                                                                                                                       |            |
|------------------------------------------------------|-----|---------------------------------------------------------------------------------------------------------------------------------------------------------------------------------------|------------|
| Implementation                                       | 10  | Who generated the random allocation sequence, who enrolled participants, and who assigned participants to interventions                                                               | NA         |
| Blinding                                             | 11a | If done, who was blinded after assignment to interventions (for example, participants, care providers, those assessing outcomes) and how                                              | NA         |
|                                                      | 11b | If relevant, description of the similarity of interventions                                                                                                                           | NA         |
| Statistical methods                                  | 12  | Methods used to address each pilot trial objective whether qualitative or quantitative                                                                                                | 13-14      |
| <b>Results</b>                                       |     |                                                                                                                                                                                       |            |
| Participant flow (a diagram is strongly recommended) | 13a | For each group, the numbers of participants who were approached and/or assessed for eligibility, randomly assigned, received intended treatment, and were assessed for each objective | 14-15      |
|                                                      | 13b | For each group, losses and exclusions after randomisation, together with reasons                                                                                                      | 14-15      |
| Recruitment                                          | 14a | Dates defining the periods of recruitment and follow-up                                                                                                                               | 14         |
|                                                      | 14b | Why the pilot trial ended or was stopped                                                                                                                                              | NA         |
| Baseline data                                        | 15  | A table showing baseline demographic and clinical characteristics for each group                                                                                                      | 15         |
| Numbers analysed                                     | 16  | For each objective, number of participants (denominator) included in each analysis. If relevant, these numbers should be by randomised group                                          | All tables |
| Outcomes and estimation                              | 17  | For each objective, results including expressions of uncertainty (such as 95% confidence interval) for any estimates. If relevant, these results should be by randomised group        | 21-22      |
| Ancillary analyses                                   | 18  | Results of any other analyses performed that could be used to inform the future definitive trial                                                                                      | NA         |
| Harms                                                | 19  | All important harms or unintended effects in each group (for specific guidance see CONSORT for harms)                                                                                 | 16         |
|                                                      | 19a | If relevant, other important unintended consequences                                                                                                                                  | NA         |
| <b>Discussion</b>                                    |     |                                                                                                                                                                                       |            |
| Limitations                                          | 20  | Pilot trial limitations, addressing sources of potential bias and remaining uncertainty about feasibility                                                                             | 25         |
| Generalisability                                     | 21  | Generalisability (applicability) of pilot trial methods and findings to future definitive trial and other studies                                                                     | 25         |
| Interpretation                                       | 22  | Interpretation consistent with pilot trial objectives and findings, balancing potential benefits and harms, and considering other relevant evidence                                   | 26         |
|                                                      | 22a | Implications for progression from pilot to future definitive trial, including any proposed amendments                                                                                 | 26         |
| <b>Other information</b>                             |     |                                                                                                                                                                                       |            |
| Registration                                         | 23  | Registration number for pilot trial and name of trial registry                                                                                                                        | 4          |
| Protocol                                             | 24  | Where the pilot trial protocol can be accessed, if available                                                                                                                          | NA         |
| Funding                                              | 25  | Sources of funding and other support (such as supply of drugs), role of funders                                                                                                       | 27         |
|                                                      | 26  | Ethical approval or approval by research review committee, confirmed with reference number                                                                                            | 9          |

1 Citation: Eldridge SM, Chan CL, Campbell MJ, Bond CM, Hopewell S, Thabane L, et al. CONSORT 2010 statement: extension to randomised pilot and feasibility trials. BMJ. 2016;355.  
2 \*We strongly recommend reading this statement in conjunction with the CONSORT 2010, extension to randomised pilot and feasibility trials, Explanation and Elaboration for important  
3 clarifications on all the items. If relevant, we also recommend reading CONSORT extensions for cluster randomised trials, non-inferiority and equivalence trials, non-pharmacological  
4 treatments, herbal interventions, and pragmatic trials. Additional extensions are forthcoming: for those and for up to date references relevant to this checklist, see [www.consort-statement.org](http://www.consort-statement.org).  
5  
6  
7  
8  
9  
10  
11  
12  
13  
14  
15  
16  
17  
18  
19  
20  
21  
22  
23  
24  
25  
26  
27  
28  
29  
30  
31  
32  
33  
34  
35  
36  
37  
38  
39  
40  
41  
42

For peer review only

# BMJ Open

## The Scleroderma Patient-centered Intervention Network – Scleroderma Support group Leader Education (SPIN-SSLED) Program: Non-randomised Feasibility Trial

|                                 |                                                                                                                                                                                                                                                                                                                                                                                                                                                                                                                                                                                                                                                                                                                                                                                                                                                                                                                                                                                                                                                                                  |
|---------------------------------|----------------------------------------------------------------------------------------------------------------------------------------------------------------------------------------------------------------------------------------------------------------------------------------------------------------------------------------------------------------------------------------------------------------------------------------------------------------------------------------------------------------------------------------------------------------------------------------------------------------------------------------------------------------------------------------------------------------------------------------------------------------------------------------------------------------------------------------------------------------------------------------------------------------------------------------------------------------------------------------------------------------------------------------------------------------------------------|
| Journal:                        | <i>BMJ Open</i>                                                                                                                                                                                                                                                                                                                                                                                                                                                                                                                                                                                                                                                                                                                                                                                                                                                                                                                                                                                                                                                                  |
| Manuscript ID                   | bmjopen-2019-029935.R2                                                                                                                                                                                                                                                                                                                                                                                                                                                                                                                                                                                                                                                                                                                                                                                                                                                                                                                                                                                                                                                           |
| Article Type:                   | Original research                                                                                                                                                                                                                                                                                                                                                                                                                                                                                                                                                                                                                                                                                                                                                                                                                                                                                                                                                                                                                                                                |
| Date Submitted by the Author:   | 27-Sep-2019                                                                                                                                                                                                                                                                                                                                                                                                                                                                                                                                                                                                                                                                                                                                                                                                                                                                                                                                                                                                                                                                      |
| Complete List of Authors:       | Thombs, Brett; McGill University, Psychiatry<br>Dyas, Laura; Scleroderma Foundation, Michigan Chapter<br>Pépin, Mia; Lady Davis Institute for Medical Research, Psychiatry<br>Aguila, Kylene; Lady Davis Institute for Medical Research, Psychiatry<br>Carrier, Marie-Eve; Jewish General Hospital, Lady Davis Institute for Medical Research<br>Tao, Lydia; Lady Davis Institute for Medical Research, Psychiatry<br>Harb, Sami; Lady Davis Institute for Medical Research, Psychiatry<br>Malcarne, Vanessa; San Diego State University, Psychology; San Diego State University/University of California, San Diego Joint Doctoral Program in Clinical Psychology<br>El-Baalbaki, Ghassan; Université du Québec à Montréal, Psychology<br>Peláez, Sandra; Lady Davis Institute for Medical Research, Psychiatry<br>Sauve, Maureen; Scleroderma Canada, Scleroderma Society of Ontario<br>Hudson, Marie; Jewish General Hospital, Lady Davis Institute for Medical Research<br>Platt, Robert; McGill University, Biostatistics<br>Patient Advisory Team, SPIN-SSLED; SPIN, SSLED |
| <b>Primary Subject Heading</b>: | Patient-centred medicine                                                                                                                                                                                                                                                                                                                                                                                                                                                                                                                                                                                                                                                                                                                                                                                                                                                                                                                                                                                                                                                         |
| Secondary Subject Heading:      | Rheumatology                                                                                                                                                                                                                                                                                                                                                                                                                                                                                                                                                                                                                                                                                                                                                                                                                                                                                                                                                                                                                                                                     |
| Keywords:                       | patient education, peer support, feasibility trial, scleroderma, systemic sclerosis, support groups                                                                                                                                                                                                                                                                                                                                                                                                                                                                                                                                                                                                                                                                                                                                                                                                                                                                                                                                                                              |
|                                 |                                                                                                                                                                                                                                                                                                                                                                                                                                                                                                                                                                                                                                                                                                                                                                                                                                                                                                                                                                                                                                                                                  |

SCHOLARONE™  
Manuscripts

## The Scleroderma Patient-centered Intervention Network – Scleroderma Support group

### Leader Education (SPIN-SSLED) Program: Non-randomised Feasibility Trial

Brett D. Thombs,<sup>1-7</sup> Laura Dyas,<sup>8</sup> Mia Pépin,<sup>1</sup> Kylene Aguila,<sup>1</sup> Marie-Eve Carrier,<sup>1</sup> Lydia Tao,<sup>1</sup>

Sami Harb,<sup>1</sup> Vanessa L. Malcarne,<sup>9,10</sup> Ghassan El-Baalbaki,<sup>11</sup> Sandra Peláez,<sup>1,6</sup> Maureen Sauvé,<sup>12</sup>

Marie Hudson,<sup>1,4</sup> Robert W. Platt,<sup>1,3</sup> SPIN-SSLED Patient Advisory Team.<sup>13</sup>

<sup>1</sup>Lady Davis Institute for Medical Research, Jewish General Hospital, Montreal, Quebec, Canada;

<sup>2</sup>Department of Psychiatry, McGill University, Montreal, Quebec, Canada;

<sup>3</sup>Department of Epidemiology, Biostatistics, and Occupational Health, McGill University, Montreal, Quebec, Canada;

<sup>4</sup>Department of Medicine, McGill University, Montreal, Quebec, Canada;

<sup>5</sup>Department of Psychology, McGill University, Montreal, Quebec, Canada;

<sup>6</sup>Department of Educational and Counselling Psychology, McGill University, Montreal, Quebec, Canada;

<sup>7</sup>Biomedical Ethics Unit, McGill University, Montreal, Quebec, Canada;

<sup>8</sup>Scleroderma Foundation Michigan Chapter, Southfield, Michigan, USA;

<sup>9</sup>Department of Psychology, San Diego State University, California, USA;

<sup>10</sup>San Diego Joint Doctoral Program in Clinical Psychology, San Diego State University/University of California, California, USA;

1  
2  
3 <sup>11</sup>Department of Psychology, Université du Québec à Montréal, Montreal, Quebec, Canada;  
4  
5

6 <sup>12</sup>Scleroderma Society of Ontario and Scleroderma Canada, Hamilton, Ontario, Canada;  
7

8 <sup>13</sup>SPIN-SSLED Patient Advisory Team Members: Kerri Connolly, Director of Programs and Services  
9  
10 of the Scleroderma Foundation, Danvers, Massachusetts, USA; Stephen Elrod, Southern California  
11  
12 Patient Group, Los Angeles, California, USA; Catherine Fortuné, Ottawa Scleroderma Support Group,  
13  
14 Ottawa, Ontario, Canada; Karen Gottesman, Director of Pharma & Biotech Engagement Scleroderma  
15  
16 Foundation, Los Angeles, California, USA; Karen Nielsen, Scleroderma Society of Ontario, Hamilton,  
17  
18 Ontario, Canada; Geneviève Guillot, Sclérodermie Québec, Longueuil, Quebec, Canada; Ken Rozee,  
19  
20 Scleroderma Society of Nova Scotia, Halifax, Nova Scotia, Canada; Amy Gietzen, Scleroderma  
21  
22 Foundation, Danvers, Massachusetts, USA; Michelle Richard, President of Scleroderma Canada,  
23  
24 Halifax, Nova Scotia, Canada; Nancy Stephens, Michigan Patient Group, Detroit, Michigan, USA.  
25  
26  
27  
28  
29  
30  
31

32 **Address for Correspondence:**  
33

34 Brett D. Thombs, PhD; Jewish General Hospital; 4333 Côte Ste Catherine Road; Montreal,  
35  
36 Quebec H3T 1E4; Telephone (514) 340-8222 ext. 25112; E-mail: brett.thombs@mcgill.ca.  
37  
38  
39  
40  
41

42 **Word Count:** 4,066  
43  
44  
45  
46  
47  
48  
49  
50  
51  
52  
53  
54  
55  
56  
57  
58  
59  
60

## ABSTRACT

**Objectives:** The Scleroderma Patient-centered Intervention Network – Scleroderma Support group Leader EDucation (SPIN-SSLED) Program was designed to improve confidence and self-efficacy and to reduce burden for support group leaders. Objectives were to (1) evaluate feasibility of program delivery, including required resources, management issues, and scientific aspects (e.g., performance of outcome measures); and (2) assess user satisfaction and identify any modifications needed to improve program content or delivery based on participant feedback.

**Design:** Non-randomised feasibility trial.

**Setting:** North American patient organisations.

**Participants:** Current support group leaders or potential new leaders referred by patient organisations.

**Intervention:** The program included 13 modules delivered live via videoconference over 3 months (April to July 2018) in 60- to 90-minute sessions.

**Outcome Measures:** (1) Elements of feasibility, including enrolment and consent procedures, percentage of referred group leaders who consented to participate, session attendance, and technical support requirements; (2) program usability, understandability, organisation, and clarity; (3) leader satisfaction with the program; and (4) planned trial outcome measures, including support group leader self-efficacy, burnout, emotional distress, and physical function.

**Results:** All 12 referred potential participants consented to enrol, and 10 were included in 2 training groups of 5 participants each. Participants attended 95% of sessions. Required

1  
2  
3 technical support was minimal, and videoconferencing technology functioned well. Overall  
4  
5  
6 program satisfaction rating was 9.4/10. Mean item rating on the 8 items of the Client  
7  
8  
9 Satisfaction Questionnaire-8 was 3.83 (1 = low satisfaction; 4 = high satisfaction). Pre-post  
10  
11 scores on the Scleroderma Support Group Leader Self-efficacy Scale increased by 1.7  
12  
13  
14 standard deviations (large effect); scores on burnout, emotional distress, and physical  
15  
16  
17 function improved by 0.44, 0.38, and 0.45 standard deviations (moderate effects).  
18

19 **Conclusion:** The SPIN-SSLED Program was feasibly delivered, including management,  
20  
21 resource, and scientific aspects. Participant satisfaction was high. The program is ready to be  
22  
23  
24 tested in a full-scale randomised controlled trial.  
25

26  
27 **Funding Source:** Canadian Initiative for Outcomes in Rheumatology cAre  
28

29  
30 **Trial Registration:** NCT03508661  
31

32  
33 **Key Words:** patient education; peer support; feasibility trial; scleroderma; support groups;  
34  
35 systemic sclerosis  
36  
37  
38  
39  
40  
41  
42  
43  
44  
45  
46  
47  
48  
49  
50  
51  
52  
53  
54  
55  
56  
57  
58  
59  
60



### STRENGTHS AND LIMITATIONS OF THIS STUDY

- This is the first trial to test the feasibility of delivering an education and training program via videoconference to peer support group leaders.
- The education and training program was developed in a partnership that included scleroderma peer support group leaders, patient organisation leaders, and researchers and health care professionals.
- Trial outcomes included elements of feasibility (e.g., management, resources, scientific aspects); program usability, understandability, organisation, and clarity; leader satisfaction with the program; and planned trial outcome measures.
- This was a non-randomised feasibility trial that only included 10 participants in 2 training groups and did not include a control group; generalisability of results outside of scleroderma is not known.

## INTRODUCTION

People with rare diseases face the same challenges as those with more common diseases plus unique challenges, including limited disease education and lack of specialised support options.[1-12] Professionally organised support services for common diseases are often available through the healthcare system,[13, 14] but are not typically available in rare diseases.[10, 15] As a result, some people with rare diseases rely on peer-led support groups for disease-specific education and support.[16-20] Support group activities typically involve an educational or information-sharing component and the exchange of emotional and practical support.[14, 18-22].

Systemic sclerosis (SSc), or scleroderma, is a rare chronic, autoimmune connective tissue disease characterised by abnormal fibrotic processes and excessive collagen production.[23-25] Support groups, most led by people with SSc, play an important role for many people with the disease.[17, 26-30] Many people with SSc, however, cannot access support groups because they are not available close to where they live, and many initiated support groups are not sustained due to challenges that could be addressed via leader training.[18, 19]

A systematic review of randomised controlled trials (RCTs) that evaluated the effects of training programs for patient leaders of illness-based support groups on the competency, self-efficacy, burden, and emotional well-being of group leaders identified only one RCT that met inclusion criteria.[31] That trial [32] evaluated confidence and self-efficacy of cancer

1  
2  
3 support group leaders randomised to either 4-month long high-resource (N = 29; website,  
4 discussion forum, 2-day face-to-face training) or low-resource (N = 23; website, discussion  
5 forum) interventions. The RCT did not find evidence that the high-resource program was  
6 more effective. However, the trial was substantially underpowered, not enough information  
7 was provided to determine intervention content or how it was delivered, and the risk of bias  
8 was high due to methodological limitations.  
9  
10  
11  
12  
13  
14  
15  
16  
17  
18

19 The Scleroderma Patient-centered Intervention Network (SPIN) partnered with SS  
20 patients and patient organisations to develop the Scleroderma Support group Leader  
21 Education (SPIN-SSLED) Program. The program is a 13-session group videoconference  
22 training program, designed to improve skills and self-efficacy, reduce burnout, and improve  
23 emotional and physical function among support group leaders. The objectives of the SPIN-  
24 SSLED feasibility trial were to (1) evaluate the feasibility of steps needed to take place in a planned  
25 full-scale trial, including the *required resources* (e.g., staffing, time, and budget), *management issues*  
26 (e.g., related to optimising performance of personnel and data systems), and *scientific aspects* (e.g.,  
27 recruitment rates of eligible leaders, acceptability of intervention to leaders, assessing performance of  
28 outcome measures) and (2) identify any modifications needed to improve the content or delivery of the  
29 SPIN-SSLED Program based on participant feedback.  
30  
31  
32  
33  
34  
35  
36  
37  
38  
39  
40  
41  
42  
43  
44  
45

## 46 **METHODS**

47  
48 The SPIN-SSLED feasibility trial was a non-randomised study. It was registered prior to  
49 enrolling participants (NCT03508661) and, although not a randomised study, is reported based  
50 on items from the CONSORT extension for randomised pilot and feasibility trials.[33] There  
51  
52  
53  
54  
55  
56  
57  
58  
59  
60

1  
2  
3 were no changes to the feasibility trial protocol and no changes to planned outcomes after  
4  
5  
6 commencement of the trial.  
7

## 8 **Participants**

9  
10 Eligible participants for the SPIN-SSLED feasibility trial were current SSc support group  
11  
12 leaders or were identified by Scleroderma Canada or the Scleroderma Foundation (United States) as a  
13  
14 new leader who will initiate a new support group, were able to use the internet to access and  
15  
16 participate in training sessions and to complete study questionnaires online, were available to  
17  
18 participate in training sessions and to complete study questionnaires online, were available to  
19  
20 participate at times when sessions were scheduled, and were English-speaking, since both groups in  
21  
22 the feasibility trial were conducted in English. The full-scale trial will include groups conducted in  
23  
24 French, but individuals who participated in the feasibility study will be excluded from the full-scale  
25  
26 RCT. Thus, to ensure that there will be an adequate number of French-speaking participants in the full-  
27  
28 scale RCT, only English-speaking leaders were included in the feasibility study.  
29  
30

## 31 **Procedures**

32  
33 For the purpose of testing the feasibility of administering the SPIN-SSLED Program, we sought  
34  
35 10 group leaders to participate in two separate training groups of 5 participants each. We asked  
36  
37 Scleroderma Canada and the Scleroderma Foundation to generate an initial list of 12 interested  
38  
39 potential participants and obtained permission for the SPIN team to send them an email with an  
40  
41 invitation to participate in the feasibility trial and a copy of the consent form. Following the initial  
42  
43 email, SPIN personnel contacted potential participants by phone within 48 hours to describe the study,  
44  
45 assess their eligibility, review the consent form, and answer questions they may have had about the  
46  
47 study. Eligible leaders who verbally agreed to enrol in the study received a second email with the  
48  
49 consent form again attached, and they were able to consent via email by replying, *“I have read the  
50  
51 consent form and understand the terms of the feasibility study. I agree to participate in the study  
52  
53  
54  
55  
56  
57  
58  
59  
60*

1  
2  
3 *testing the feasibility of the SPIN-SSLED Program.*” The first 10 people to respond and consent were  
4  
5 enrolled, and the other 2 were put on a waiting list. All leaders who consented to participate and  
6  
7 enrolled received an email invitation including a clickable link to the online data management platform  
8  
9 where they were asked to complete baseline study measures. The email also included the date of their  
10  
11 first training session, the topic of the first session and information on how to login to the  
12  
13 videoconferencing system, as well as a link to the SPIN-SSLED online forum platform, where the  
14  
15 program manual and associated PowerPoint slides were available. Ongoing email and phone technical  
16  
17 support was available to help leaders with the consent process, access to the data management platform  
18  
19 to complete study measures, and training sessions.  
20  
21  
22  
23

24 The trial was approved by the ethics committee of the Centre intégré universitaire de santé et de  
25  
26 services sociaux du Centre-Ouest-de-l’Île-de-Montréal.  
27  
28

### 29 **Intervention**

30  
31 The SPIN-SSLED Program was developed by a team of researchers and health care  
32  
33 professionals with expertise in SSc, patient organisation representatives and a Support Group Advisory  
34  
35 Team comprised of people with SSc who are current SSc support group leaders. The program content  
36  
37 and design were based on results of our preliminary research on support groups in SSc, including  
38  
39 individual interviews and surveys with leaders, members, and non-attenders,[17-20] and informed by  
40  
41 instructional material for support group leaders in other diseases that we identified via the internet and  
42  
43 by consultations with support group leaders. The program uses a problem-based learning approach.  
44  
45 Problem-based learning is a learner-centred approach that integrates theory and practice by providing  
46  
47 the necessary knowledge and skills, presenting a complex, real-world problem, then working to  
48  
49 identify an approach to solving the problem.[34-37] To implement this, each module introduces a topic  
50  
51  
52  
53  
54  
55  
56  
57  
58  
59  
60

and provides an overview of key information. Then, there is a guided discussion among training group participants about possible approaches and solutions to problems.

The SPIN-SSLED Program included 13 modules that are delivered live via videoconference over the course of 3 months. Each module is delivered in a 60- to 90-minute session. Module topics include (1) the leader's role; (2) starting a support group; (3) structuring a support group meeting; (4) scleroderma 101; (5) successful support group culture; (6) managing support group dynamics I; (7) managing support group dynamics II; (8) grief and crisis in scleroderma; (9) marketing and recruitment; (10) the continuity of the group; (11) supporting yourself as a leader; (12) virtual support group meetings, and (13) support group leader resources. See Table 1 for module content. The program includes 11 filmed vignettes that demonstrate effective group facilitation techniques and ways to respond to problems that arise with the behaviours of specific group members or group interactions. In addition to the live modules, SPIN-SSLED participants receive a program manual that summarises didactic material that is provided in the sessions.

Table 1. Content of Program Modules

| Module Title                       | Module Description                                                                                                                                                                                                                                                                                                                    |
|------------------------------------|---------------------------------------------------------------------------------------------------------------------------------------------------------------------------------------------------------------------------------------------------------------------------------------------------------------------------------------|
| 1. The Support Group Leader's Role | This module discusses the benefits of being a support group leader, the expectations of what the role of leader involves (e.g. facilitation of meetings and interactions but not giving medical advice), and tips for being an effective and supportive leader.                                                                       |
| 2. Starting a Support Group        | This module discusses the purpose of a support group, what people with scleroderma hope to gain from support group, why some don't attend, establishing leadership (e.g. one leader, co-leader), membership (e.g. patients only, open to family, and friends), logistics of starting a group (e.g. time, place and meeting duration). |

|                                                     |                                                                                                                                                                                                                                                                                                                                                                                                                                                                    |
|-----------------------------------------------------|--------------------------------------------------------------------------------------------------------------------------------------------------------------------------------------------------------------------------------------------------------------------------------------------------------------------------------------------------------------------------------------------------------------------------------------------------------------------|
| 3. Structuring Support Group Meetings               | This module discusses formatting group meeting and how to successfully integrate both educational activities with emotional and practical support for members, setting up a meeting agenda.                                                                                                                                                                                                                                                                        |
| 4. Scleroderma 101                                  | This module shows a filmed conference by a physician specialized in scleroderma who explain the different types of scleroderma, symptoms, causes, treatments, and alternative approaches. The module also includes tips to evaluate credibility of information sources on the Internet.                                                                                                                                                                            |
| 5. Successful Support Group Culture                 | This module discusses the importance of establishing expectations and guidelines for the support group with members, the importance of confidentiality, how to create and maintain positive and productive support group culture using (1) encouraging statements, (2) open-ended questions, (3) body language, (4) linking similar experiences between members, and (5) summarizing discussions. This module uses video vignettes to illustrate these techniques. |
| 6. Managing Group Dynamics Part I                   | This module discusses managing difficult support group dynamics such as members who are “quick fixers”, overly talkative, how to maintain a positive group environment, conflict management and resolution for minor and larger issues. This module uses video vignettes to illustrate these techniques.                                                                                                                                                           |
| 7. Managing Group Dynamics Part II                  | This module discussed how to identify and respond to members who are overly shy or who are chronically negative, and what to do when members bring unsubstantiated, inaccurate or potentially misleading medical information to the group. This module uses video vignettes to illustrate these techniques.                                                                                                                                                        |
| 8. Grief and Crisis in Scleroderma                  | The module discusses different situations that may bring grief to members, stages of grief, supporting group members in grief, dealing with medical crises or death of group members.                                                                                                                                                                                                                                                                              |
| 9. Advertising and Recruiting for the Support Group | This module discusses how to advertise and promote a support group, how to recruit new members for support groups on ongoing basis, advertising through patient organizations and strategies to retain members.                                                                                                                                                                                                                                                    |

|                                     |                                                                                                                                                                                                                                                                                                                                                                                                        |
|-------------------------------------|--------------------------------------------------------------------------------------------------------------------------------------------------------------------------------------------------------------------------------------------------------------------------------------------------------------------------------------------------------------------------------------------------------|
| 10. The Continuity of the Group     | This module discusses the importance of understanding and overcoming reluctance in seeking feedback, the importance of feedback in the support group experience, how to obtain and respond to feedback, how to identify reasons why members may stop attending meetings and strategies to help maintain membership, how to keep members engaged and move your support group forward by making changes. |
| 11. Supporting Yourself as a Leader | This module discusses understanding what leader burnout is, understanding why it can happen and what the warning signs are, understanding the best way to address burnout including identifying methods of coping, understanding at what point it may be best for a leader to step down from his or her role, strategies to prevent experiencing leader burnout.                                       |
| 12. Remote support groups           | This module discusses the benefits of an online support group, finding the right technology, scheduling and programming, advertising and reaching your target audience, tips for successful online meetings.                                                                                                                                                                                           |
| 13. Resources                       | This module discusses strategies on how to obtain information and resources, how to communicate information effectively to members, the responsibilities of the national organization, meeting the resource needs of the group, access to the SPIN-SSLED Online Resource Center to download scleroderma talks, educational videos, and research articles for leaders and members of support groups.    |

Based on our previous experience with videoconferencing and consistent with previous trials of videoconference training, 5 group leaders were assigned to each training group to maximise effective interaction and participation.[38-41] Training sessions were delivered using the GoToMeeting® videoconferencing platform, a high-performance platform that has been used successfully for similar applications.[42-44] In addition to the videoconference sessions, participants had access to a secure, monitored SPIN-SSLED online forum via the Slack® communication tool to interact with other participants about program content. The two training groups were held in the evening.

### **Feasibility Outcomes**

Outcomes related to process and resources were assessed throughout the duration of the feasibility trial, and leader feedback was obtained upon completion of the program. The collected



1  
2  
3 measures of feasibility included assessments of the (1) enrolment and consent procedure, (2)  
4 percentage of referred and eligible group leaders who consented to participate, (3) personnel  
5 requirements to assist participants with accessing the GoToMeeting® videoconferencing platform for  
6 sessions and the online survey program Qualtrics® for online data collection pre-training and post-  
7 training, (4) technological performance of the videoconferencing system, and (5) any challenges for  
8 study personnel.  
9  
10  
11  
12  
13  
14  
15

16  
17 Individual semi-structured interviews were conducted with all participants via telephone upon  
18 completion of the 13 modules using items based on the Patient Education Materials Assessment Tool  
19 for Audiovisual Materials (PEMAT) [45] and addressed topics related to usability, understandability,  
20 organisation, and clarity of the SPIN-SSLED program, including its videoconference-based delivery.  
21  
22 The PEMAT included a single rating of satisfaction from 0 (worst possible) to 10 (best possible).  
23  
24  
25  
26  
27

### 28 **SPIN-SSLED Planned Trial Outcome Measures**

29  
30  
31 In the planned full-scale RCT, we will evaluate whether the SPIN-SSLED Program is effective  
32 in improving SSc support group leaders' self-efficacy for carrying out their leader role (primary) and if  
33 the program reduces burnout, improves emotional well-being, and improves physical function among  
34 support group leaders (secondary). The SPIN-SSLED feasibility trial was not intended to test  
35 hypotheses and did not have adequate power for this, but we collected trial outcome measures at the  
36 time of consent to participate in the trial and following completion of the program to evaluate the  
37 percentage of measures that were completed and to evaluate performance of the measures. Participants  
38 were emailed invitations to complete baseline and post-intervention measures using the online survey  
39 program Qualtrics®.  
40  
41  
42  
43  
44  
45  
46  
47  
48  
49  
50

51  
52 **Leader Self-Efficacy**: The Scleroderma Support Group Leader Self-efficacy Scale (SSGLSS)  
53 [46] was developed by our research team, including the members of the SPIN Support Group Advisory  
54  
55  
56  
57  
58  
59  
60

1  
2  
3 Team, to measure support group leader self-efficacy for performing leader tasks. Initial items were  
4  
5  
6 obtained from the Group Leader Self-Efficacy Instrument, a 37-item self-report questionnaire  
7  
8  
9 that assesses self-efficacy for performing group leader skills.[47] The Group Leader Self-  
10  
11  
12 Efficacy Instrument is intended for use with group psychotherapy leaders, so many of its  
13  
14  
15 items are not relevant or appropriate for support group leaders. Items from this instrument  
16  
17  
18 were reviewed for relevancy, and relevant items were considered for inclusion, along with  
19  
20  
21 items from a questionnaire intended for leaders of cancer and multiple sclerosis support  
22  
23  
24 groups [48] and items that we generated from the results of a published study on the  
25  
26  
27 experiences of leaders of cancer support groups.[49] All items were then reviewed by members  
28  
29  
30 of our research team to remove items that were repetitive or not relevant for SSc and to generate new  
31  
32  
33 items to reflect important SSc-specific content based on their own experiences or on qualitative  
34  
35  
36 interviews that we conducted with SSc support group leaders (N = 10). Items were then reviewed  
37  
38  
39 iteratively by all members of the research team until a consensus was reached on included items. The  
40  
41  
42 resulting 32-item scale is scored on a 6-point Likert scale from 1 (strongly disagree) to 6 (strongly  
43  
44  
45 agree) with possible total scores from 32 to 192 and higher scores indicating greater self-efficacy. The  
46  
47  
48 SSGLSS was validated in two samples of SSc support group leaders (N = 102, N = 55) and found to  
49  
50  
51 have good internal consistency (Cronbach's alpha 0.96 and 0.95) and hypothesis-consistent convergent  
52  
53  
54 validity with the Oldenburg Burnout Inventory (OLBI). A strength of using the SSGLSS as the  
55  
56  
57 primary outcome measure is that both the intervention and the SSGLSS were designed to  
58  
59  
60 reflect training needs of SSc support group leaders, and the items of the SSGLSS all reflect  
material covered in the program.

1  
2  
3  
4 **Burnout:** Leader burnout was assessed with the OLBI,[50-52] which is a 16-item  
5  
6 measure that assesses exhaustion and disengagement due to burnout. The OLBI was initially  
7  
8 designed for work-related burnout, but has been adapted for numerous settings and in  
9  
10 multiple countries and languages.[52] Our research team revised the wording of each OLBI  
11  
12 item to reflect the support group environment rather than a work environment (e.g., "I find  
13  
14 my work to be a positive challenge" was revised to "I find my role as a support group leader  
15  
16 to be a positive challenge"). The OLBI has a two-factor structure (exhaustion and  
17  
18 disengagement) with good measurement properties.[50-52] Items are scored on a 4-point  
19  
20 scale; higher scores indicate higher levels of exhaustion and disengagement. Internal  
21  
22 consistency reliability (Cronbach's alpha) in patients with SSc was 0.84 for exhaustion and 0.80  
23  
24 for disengagement.[46]

25  
26  
27  
28  
29  
30  
31  
32 **Emotional Distress:** The Patient Health Questionnaire-8 (PHQ-8) was used to assess  
33  
34 emotional distress.[53] The PHQ-8 items measure depressive symptoms over the last 2 weeks  
35  
36 on a 4-point scale, ranging from 0 (not at all) to 3 (nearly every day) with higher scores  
37  
38 indicating more depressive symptoms. The PHQ-8 performs equivalently to the PHQ-9,[53]  
39  
40 which has been shown to be a valid measure of depressive symptoms in patients with  
41  
42 SSc.[54]

43  
44  
45  
46  
47  
48 **Physical Function:** Physical function was measured using the Physical Function subscale of  
49  
50 the 29-item Patient Reported Outcomes Measurement Information System (PROMIS-29) version 2.0.  
51  
52 The PROMIS-29 measures 8 domains of health status with 4 items for each of 7 domains (physical  
53  
54 function, anxiety, depression, fatigue, sleep disturbance, social roles and activities, pain interference)  
55  
56

1  
2  
3 plus a single item for pain intensity. Items are scored on a 5-point scale (range 1-5), with different  
4  
5 response options for different domains, and the single pain intensity item is measured on an 11-point  
6  
7 rating scale. Higher scores represent more of the domain being measured; that is, better physical  
8  
9 function. Total raw scores are obtained by summing item scores for each domain. The PROMIS-29  
10  
11 version 2.0 has been validated in SSc.[55]  
12  
13

14  
15 **Participant Satisfaction:** Satisfaction with the SPIN-SSLED Program was evaluated with the  
16  
17 Client Satisfaction Questionnaire-8 (CSQ-8),[56] a standardised survey that is used to assess  
18  
19 satisfaction with health services. Items are scored on a Likert scale from 1 (low satisfaction) to 4 (high  
20  
21 satisfaction) with total scores ranging from 8 to 32. The CSQ-8 has been widely validated across a  
22  
23 range of populations and health services programs.[57]  
24  
25

26  
27 **Adverse Events:** Following each session, we emailed participants and requested that they report  
28  
29 any concerns that they had about the sessions or their experience in the sessions.  
30

### 31 **Sample size**

32  
33 Guidance on appropriate sample size for feasibility trials varies substantially in the published  
34  
35 literature. For the purposes of establishing feasibility of delivery of the SPIN-SSLED Program, we  
36  
37 determined that conducting two different training groups would allow us to evaluate intervention  
38  
39 content and delivery aspects, and, thus, we sought to recruit a total of 10 participants to conduct two  
40  
41 training groups.  
42  
43

### 44 **Data Analysis**

45  
46 Feasibility outcomes included leader eligibility and recruitment, leader enrolment, and  
47  
48 technological performance of the videoconferencing system. Qualitative information via interviews  
49  
50 and weekly reports by participants was collected, and all suggestions for changes to the program or  
51  
52 trial methods that could be implemented prior to beginning a full-scale trial were recorded. Descriptive  
53  
54  
55  
56  
57  
58  
59  
60

1  
2  
3 statistics were used to provide means and standard deviations for SPIN-SSLED Program outcome  
4  
5 measures. Since the purpose of this feasibility trial was to evaluate feasibility and identify any  
6  
7 modifications to the intervention or trial plan, the trial was not designed or powered to test hypotheses  
8  
9 about outcomes. Thus, consistent with best practices,[33] hypothesis tests were not conducted, but  
10  
11 effect sizes for pre-post differences are shown. Data were analysed using the statistics software  
12  
13 program, IBM SPSS.  
14  
15

### 16 17 **Patient and Public Involvement**

18  
19 The SPIN Support Group Advisory Team has been involved in all stages of SPIN's  
20  
21 research on support groups in SSc, including preliminary research on support groups in SSc,  
22  
23 the development of the SPIN-SSLED program, and the design and implementation of the  
24  
25 feasibility trial. Members of the Team initially participated in the design of the Scleroderma  
26  
27 Support Group Survey, which informed developing of the program by collecting information  
28  
29 on the experiences and training needs of SSc support group leaders, priorities of SSc support  
30  
31 group members, and reasons why people do not attend SSc support groups.[17-20] Team  
32  
33 members participated in the development of the SSGLSS,[46] which was administered in the  
34  
35 feasibility trial and will be the primary outcome for the planned full-scale trial. Team members  
36  
37 provided input into the development of the SPIN-SSLED Program and its modules, filmed the  
38  
39 vignettes used in the program, and were involved in decisions related to the conduct of the feasibility  
40  
41 trial.  
42  
43  
44  
45  
46  
47  
48

## 49 **RESULTS**

### 50 51 **Participant Characteristics**

The trial was conducted between April and July 2018. Scleroderma Canada and the Scleroderma Foundation each provided our team with names of 6 potential participants. All agreed to participate in the program. We initially enrolled 10 participants, but one was hospitalised prior to initiating the program. Thus, prior to starting the trial, we added one participant who had been wait-listed.

All 10 participants were female. The mean age was 58 years (standard deviation [SD] = 11 years). There were 6 participants from Canada and 4 from the United States. All 10 described themselves as White, and one also described herself as Aboriginal. Of the 10 participants, 9 were people with SSc. Mean years since diagnosis among those with SSc was 11 years. Participant characteristics are shown in Table 2.

**Table 2. Participant Characteristics**

| Characteristics                           | N Participants<br>= 10 |
|-------------------------------------------|------------------------|
| Female sex, <i>n</i> (%)                  | 10 (100%)              |
| Age in years, <i>mean</i> ( <i>SD</i> )   | 57.7 (11.1)            |
| Country, <i>n</i> (%)                     |                        |
| Canada <sup>a</sup>                       | 6 (60%)                |
| United States <sup>b</sup>                | 4 (40%)                |
| Race/ethnicity, <sup>c</sup> <i>n</i> (%) |                        |
| White                                     | 10 (100%)              |
| Aboriginal                                | 1 (10%)                |
| Relationship status, <i>n</i> (%)         |                        |
| Married or living as married              | 8 (80%)                |
| Separated or divorced                     | 2 (20%)                |

|                                                       |            |
|-------------------------------------------------------|------------|
| Education in years, <i>mean (SD)</i>                  | 17.5 (2.7) |
| Occupational status, <i>n (%)</i>                     |            |
| Homemaker                                             | 1 (10%)    |
| Part- or full-time employment <sup>b</sup>            | 2 (20%)    |
| Disability                                            | 3 (30%)    |
| Retired                                               | 4 (40%)    |
| SSc diagnosis, <i>n (%)</i>                           |            |
| Limited SSc                                           | 4 (40%)    |
| Diffuse SSc                                           | 5 (50%)    |
| Not diagnosed with SSc                                | 1 (10%)    |
| Years since SSc diagnosis, <i>mean (SD)</i>           | 10.9 (7.4) |
| Current leader of SSc support group                   | 10 (100%)  |
| Years as a SSc support group leader, <i>mean (SD)</i> | 3.6 (3.7)  |

<sup>a</sup> Participants from British Columbia, Manitoba, Ontario, Quebec (2), and Saskatchewan.

<sup>b</sup> Participants from California (3) and Florida.

<sup>c</sup> Participants could select more than one race/ethnicity.

## Feasibility Outcomes

All 10 participants completed all baseline and post-trial measures, including the PEMAT interview. Participant attendance at the weekly sessions was high (95%; 123 of 130 sessions). No sessions were missed or delayed due to technological difficulties, and time for technological support from our team was between 1-2 hours for the entire program. Per the PEMAT interviews and per our observations, the GoToMeeting system worked fluidly and supported the training groups well.

A summary of responses to the PEMAT interviews is shown in Table 3. As can be seen in the table, there were relatively minor suggestions for improving the program. Overall, feedback was

extremely positive. The overall mean grade given by participants for the SPIN-SSLED Program was 9.4/10. No concerns related to adverse events were reported.

**Table 3. Summary of Responses to the Patient Education Materials Assessment Tool for Audiovisual Materials (PEMAT) Interviews**

| PEMAT Item                                                                                                                               | Summary of Responses                                                                     |
|------------------------------------------------------------------------------------------------------------------------------------------|------------------------------------------------------------------------------------------|
| Are you currently a leader of a support group, a co-leader or planning on becoming a support group leader?                               | 4 co-leaders, 5 leaders, 1 plans to become leader.                                       |
| <b>PROCESS</b>                                                                                                                           |                                                                                          |
| Did you find that the weekly frequency of the training sessions was adequate?                                                            | 10 yes.                                                                                  |
| Did you find the length of each training session appropriate?                                                                            | 10 yes; 3 added that grief module was not long enough, 1 said grief module was too long. |
| Was it difficult to find the motivation to attend the training session every week?                                                       | 9 no; 1 sometimes due to scheduling.                                                     |
| <b>PURPOSE</b>                                                                                                                           |                                                                                          |
| Did you understand the objectives of the SPIN-SSLED training program modules?                                                            | 10 yes.                                                                                  |
| Did you find the information provided in the SPIN-SSLED training program relevant?                                                       | 10 yes.                                                                                  |
| <b>WORDS AND LANGUAGE</b>                                                                                                                |                                                                                          |
| Did you find that the content of the program manual was clear, concise and easy to follow?                                               | 10 yes.                                                                                  |
| Did you find that the content delivered in the training sessions and the discussion about the content was easy to understand and useful? | 10 yes.                                                                                  |
| <b>CONTENT AND ORGANISATION</b>                                                                                                          |                                                                                          |
| Did you find that the content of the SPIN-SSLED modules was presented logically and well-organised?                                      | 10 yes.                                                                                  |
| Did you find that the order of the modules was logical and that linkages were clear?                                                     | 9 yes; 1 said that order was “staggered”.                                                |



1  
2  
3 Did you find the discussion among other participants helpful? 10 yes; 1 mentioned that sometimes she had questions and  
4 challenges specific to herself that she didn't have time to get  
5 addressed.

---

## 6 VIDEO VIGNETTES

---

8 Did the fact that the video vignettes scenarios were performed by scleroderma patients make  
9 the program more relatable? 9 yes; 1 had difficulty hearing the videos (participant with  
10 hearing impairment).

12 Were you able to clearly understand the people speaking in the videos? 9 yes; 2 no; 1 indicated there were small things they didn't quite  
13 hear (participant with hearing impairment).

14 Did you develop an understanding of the challenges that could arise in a support group  
15 from watching the videos and obtain useful information or strategies to address them? 8 yes, 2 no (not hearing properly; 1 participant with hearing  
16 impairment).  
17  
18

---

## 20 TECHNOLOGY

---

22 Did you use a computer, phone, tablet or all these devices to access the SPIN-SSLED  
23 Training Program? 7 used computer, 4 used phone, 1 used tablet (> 10 due to >1  
24 method for some participants).

26 Did the initial invitation email provide you with the information you needed to understand  
27 how to log in for the training session? 10 yes.  
28

30 Did you experience any technical difficulties while using GoToMeeting? 8 no; 2 minor.

32 Did you experience any technical difficulties while using Slack chatroom? 7 no; 3 did not use it. Use overall was minimal.

35 Did you use the guide we provided to use GoToMeeting and the Slack chatroom? 5 yes; 5 no.  
36  
37

---

## 38 OVERALL APPRECIATION

---

40 Can you please tell us about your experience with the SPIN-SSLED Training Program,  
41 including things that you liked about the program and things that could be improved?  
42 Positive aspects of program: informative, organised, videos, “Supporting Yourself as a Leader” and “Grief and Crisis”  
43 modules were identified as very important.  
44 Positive aspects of SPIN-SLLED program leader: clear, conscientious, answered questions thoroughly, gave  
45 opportunities for feedback, was available between sessions.  
46 To improve: discuss financial support for support group expenses, expand grief module over 2 sessions, do sessions in  
47 winter instead of summer so that individuals with scleroderma can only enjoy the outdoors in summer, adding more videos.  
48  
49  
50  
51  
52  
53  
54  
55  
56  
57  
58  
59  
60

|                                 |                                                                                                                                             |                                                                                                                                                            |
|---------------------------------|---------------------------------------------------------------------------------------------------------------------------------------------|------------------------------------------------------------------------------------------------------------------------------------------------------------|
| 1<br>2<br>3<br>4<br>5<br>6<br>7 | What grade (on a 0-10 scale, 0 being the worst and 10 being the best possible score) would you give the program?<br>0 (worst) to 10 (best). | 5 rated 10, 1 rated 9, 1 rated 9.5, 2 rated 8, 1 rated "9 or 10".<br><br>Mean score: 9.4/10                                                                |
| 8<br>9<br>10                    | Would you recommend this program to someone with scleroderma?                                                                               | 10 yes.                                                                                                                                                    |
| 11<br>12<br>13<br>14            | Is there anything you want to give us feedback about that was not included in this interview?                                               | The remote support group meetings module was less important to 1 participant. Suggestion to make recordings of support group discussions available online. |

---

### SPIN-SSLED Planned Trial Outcome Measures

Table 4 shows the responses to each of the 32 items of the SSGLSS, which will be the primary outcome measure in the full-scale trial. Pre-training, the mean (SD) was 124.4 (22.0), which was similar to the scores of our two international samples from the SSGLSS validation study (N = 102, mean SSGLSS = 122.9 (21.7); N = 55, mean SSGLSS = 123.9 (19.4)). Post-training, the mean total score increased to 159.2 (17.1). The standardised mean difference effect size was 1.70, which is considered a large effect size.[58] SSGLSS items are scored on a 1-6 scale, and the average item score increase pre-post training was 1.1 points.

**Table 4. Pre- and Post- Intervention Item and Total Scores for the Scleroderma Support Group Leader Self-efficacy Scale:**

Possible item scores range from 1 to 6 with higher scores reflecting greater self-efficacy

| Items                                                                                                                 | Pre-Trial N | Pre-Trial Mean (SD) | Post-Trial N | Post-Trial Mean (SD) | Standardised Mean Difference Effect Size (95% confidence interval – total only) |
|-----------------------------------------------------------------------------------------------------------------------|-------------|---------------------|--------------|----------------------|---------------------------------------------------------------------------------|
| 1. Obtain financial or other resources needed to run the group                                                        | 10          | 3.5 (1.7)           | 10           | 4.8 (1.2)            | 0.61                                                                            |
| 2. Promote the group to health professionals as an important resource for patients                                    | 10          | 4.5 (0.7)           | 10           | 5.4 (0.7)            | 1.80                                                                            |
| 3. Share responsibilities, including administrative and practical tasks, with a co-facilitator or other group members | 10          | 4.8 (1.6)           | 10           | 5.5 (0.5)            | 0.52                                                                            |
| 4. Manage group members who are overly talkative or monopolize the discussion                                         | 10          | 3.9 (1.1)           | 10           | 4.8 (0.6)            | 1.13                                                                            |
| 5. Manage group members who assume the role of the "know-it-all"                                                      | 10          | 3.9 (1.1)           | 10           | 4.6 (0.8)            | 0.73                                                                            |
| 6. Support members of the group who are grieving                                                                      | 10          | 3.3 (1.5)           | 10           | 4.7 (0.8)            | 0.97                                                                            |
| 7. Help overly shy group members feel comfortable interacting with the group                                          | 10          | 3.9 (1.1)           | 10           | 4.9 (0.7)            | 1.14                                                                            |
| 8. Help group members cope with difficult events, such as the death of a member                                       | 10          | 3.0 (1.8)           | 10           | 4.7 (0.8)            | 0.90                                                                            |
| 9. Effectively recruit new members                                                                                    | 10          | 3.5 (1.4)           | 10           | 4.9 (0.7)            | 1.18                                                                            |
| 10. Address the different needs of groups members at varying stages of the disease                                    | 10          | 3.7 (1.6)           | 10           | 4.8 (0.6)            | 0.77                                                                            |
| 11. Manage conflicts and disagreements between group members                                                          | 10          | 3.3 (1.4)           | 10           | 4.5 (0.7)            | 0.95                                                                            |
| 12. Help the group establish appropriate group rules, such as maintaining confidentiality                             | 10          | 4.3 (1.1)           | 10           | 5.8 (0.4)            | 2.31                                                                            |
| 13. Effectively publicize the group                                                                                   | 10          | 3.5 (1.1)           | 10           | 5.1 (0.7)            | 1.86                                                                            |
| 14. Intervene effectively when group rules are not being followed                                                     | 10          | 4.0 (1.1)           | 10           | 5.0 (0.7)            | 1.30                                                                            |
| 15. Obtain the support I need to cope with the emotional demands of leading the group                                 | 10          | 2.9 (1.2)           | 10           | 4.9 (1.0)            | 1.65                                                                            |
| 16. Respond constructively to feedback from group members                                                             | 10          | 4.6 (0.8)           | 10           | 5.3 (0.8)            | 1.01                                                                            |
| 17. Help group members relate to other members of a different age                                                     | 10          | 4.1 (1.0)           | 10           | 5.1 (0.7)            | 1.30                                                                            |
| 18. Provide the structure needed for successful meetings                                                              | 10          | 5 (0.9)             | 10           | 5.6 (0.5)            | 1.03                                                                            |
| 19. Keep the group meetings interesting and relevant to both new and returning members                                | 10          | 4.2 (0.9)           | 10           | 5.2 (0.8)            | 1.35                                                                            |

|                                                                                                 |    |              |    |              |                   |
|-------------------------------------------------------------------------------------------------|----|--------------|----|--------------|-------------------|
| 20. Manage group members who oversimplify or minimize the concerns of other members             | 10 | 3.5 (1.4)    | 10 | 4.9 (0.9)    | 0.99              |
| 21. Facilitate the group meetings so that all members have an opportunity to speak              | 10 | 4.6 (0.8)    | 10 | 5.1 (0.9)    | 0.68              |
| 22. Help the group stay focused on topics that are relevant to members                          | 10 | 4.4 (0.7)    | 10 | 5.3 (0.7)    | 1.88              |
| 23. Obtain feedback from members about the group                                                | 10 | 4.3 (0.8)    | 10 | 5.0 (0.8)    | 1.04              |
| 24. Organise and plan activities for group members, such as having guest speakers               | 10 | 4.5 (1.4)    | 10 | 5.5 (0.7)    | 0.86              |
| 25. Help members feel comfortable in the group and relate to one another                        | 10 | 4.4 (0.8)    | 10 | 5.2 (0.6)    | 1.43              |
| 26. Obtain feedback from members about my leadership                                            | 10 | 3.6 (0.7)    | 10 | 4.8 (0.9)    | 1.79              |
| 27. Help group members relate to other members of a different cultural background               | 10 | 3.9 (1.2)    | 10 | 4.5 (1.0)    | 0.50              |
| 28. Communicate reasonable boundaries about my availability outside of the group                | 10 | 3.7 (1.3)    | 10 | 4.5 (1.0)    | 0.64              |
| 29. Talk to a group member about her or his behaviour if it is disruptive to the group          | 10 | 2.7 (1.3)    | 10 | 4.5 (0.9)    | 1.58              |
| 30. Ask a member to leave the group due to her or his disruptive behaviour                      | 10 | 1.6 (1.0)    | 10 | 4.2 (1.1)    | 2.32              |
| 31. Help group members relate to other members of a different gender                            | 10 | 4.4 (1.1)    | 10 | 5.0 (0.8)    | 0.65              |
| 32. Recruit a co-facilitator or other group members to help me with leadership responsibilities | 10 | 4.9 (1.3)    | 10 | 5.1 (0.9)    | 0.16              |
| <b>Total Score (Possible Range 32 to 192)</b>                                                   | 10 | 124.4 (22.0) | 10 | 159.2 (17.0) | 1.70 (0.67, 2.72) |

Table 5 shows results for health outcomes, including burnout (OLBI), emotional distress (PHQ-8), and physical function (PROMIS-29). For all of these outcomes, the standardised mean difference effect size of post-trial score improvement was between 0.38 and 0.45, which are typically considered small to moderate effect sizes.[58]

**Table 5. Pre- and Post- Intervention Total Scores for Secondary Outcome Measures**

| Measure                                                                            | Pre-Trial N | Pre-Trial Mean (SD) | Post-Trial N | Post-Trial Mean (SD) | Standardised Mean Difference Effect Size (95% confidence interval) |
|------------------------------------------------------------------------------------|-------------|---------------------|--------------|----------------------|--------------------------------------------------------------------|
| Oldenburg Burnout Inventory<br>(higher scores = greater burnout)                   | 10          | 33.2 (4.6)          | 10           | 31.0 (4.9)           | 0.44 (-0.44, 1.33)                                                 |
| Patient Health Questionnaire-8<br>(higher scores = greater symptoms of depression) | 10          | 10.8 (2.7)          | 10           | 9.8 (2.4)            | 0.38 (-0.50, 1.27)                                                 |
| PROMIS-29 Physical Function<br>(higher raw scores = greater function)              | 10          | 17.1 (2.2)          | 10           | 18.2 (2.4)           | 0.45 (-0.42, 1.36)                                                 |

As shown in Table 6, the mean post-training score on the CSQ-8 was 30.6 (2.2). On a per item basis, the mean item score (possible range 1-4) was 3.8, reflecting a very high level of satisfaction with the experience of trainees with the SPIN-SSLED Program.

**Table 6. Post-Intervention Items, Frequencies, and Total Scores for the Client Satisfaction Questionnaire-8: Item response options very across items, but all scored 1-4**

| Items                                                         | 1 Point (Dissatisfied) n (%) | 2 Points (Mildly Satisfied) n (%) | 3 Points (Mostly Satisfied) n (%) | 4 Points (Quite Satisfied) n (%) | Item Mean (SD) |
|---------------------------------------------------------------|------------------------------|-----------------------------------|-----------------------------------|----------------------------------|----------------|
| 1. How would you rate the quality of the SPIN-SSLED training? | 0 (0%)                       | 0 (0%)                            | 1 (10%)                           | 9 (90%)                          | 3.9 (0.3)      |

|                                                                                                         |        |        |         |           |           |
|---------------------------------------------------------------------------------------------------------|--------|--------|---------|-----------|-----------|
| 2. Did the SPIN-SSLED program provide you the kind of training you wanted?                              | 0 (0%) | 0 (0%) | 2 (20%) | 8 (80%)   | 3.8 (0.4) |
| 3. To what extent has the SPIN-SSLED training met your needs?                                           | 0 (0%) | 0 (0%) | 4 (40%) | 6 (60%)   | 3.6 (0.5) |
| 4. If a friend were in need of similar training, would you recommend the SPIN-SSLED program to him/her? | 0 (0%) | 0 (0%) | 2 (20%) | 8 (80%)   | 3.8 (0.4) |
| 5. How satisfied are you with the amount of training you received from the SPIN-SSLED program?          | 0 (0%) | 0 (0%) | 2 (20%) | 8 (80%)   | 3.8 (0.4) |
| 6. Has the SPIN-SSLED training helped you to deal more effectively with your support group leader role? | 0 (0%) | 0 (0%) | 0 (10%) | 10 (100%) | 4.0 (0.0) |
| 7. In an overall, general sense, how satisfied are you with the SPIN-SSLED training?                    | 0 (0%) | 0 (0%) | 1 (20%) | 9 (90%)   | 3.9 (0.3) |
| 8. If you were to seek help again, would you come back to the SPIN-SSLED training?                      | 0 (0%) | 0 (0%) | 2 (20%) | 8 (80%)   | 3.8 (0.4) |

---

**Total Score**  
**(Possible Range 8 to 32)** 30.6 (2.2)

---

## DISCUSSION

Feasibility of delivering the SPIN-SSLED Program in the context of a trial, participant satisfaction, and program content were evaluated in the SPIN-SSLED feasibility trial. Results

1  
2  
3 informed revisions to the content of the program and provided confidence that the program can be  
4 effectively and efficiently delivered in a full-scale trial.  
5  
6

7  
8 With respect to overall experience with the program and program content, participants reported  
9 that the content was clear and well-organised. Overall satisfaction with their experience in the SPIN-  
10 SSLED Program was rated as 9.4 out of 10 on average. Participant satisfaction was similarly high  
11 when evaluated with the 8 items of the CSQ. Several participants encouraged the research team to  
12 expand on the single module related to grief. Based on comments and follow-up discussions with  
13 participants, the program was revised to include two modules on grief, including one module on grief  
14 and loss that leaders have experienced because they or somebody close to them has been diagnosed  
15 with SSc and a second module on providing support to group members who are struggling with grief  
16 and loss. In order to add a second module on grief and loss, the two modules on managing group  
17 dynamics were reduced to a single module. To facilitate this, rather than viewing all of the short video  
18 vignettes included in those modules as part of the training sessions, participants suggested that they  
19 could view the vignettes prior to the sessions and then suggest specific modules for review and  
20 discussion in the training sessions.  
21  
22  
23  
24  
25  
26  
27  
28  
29  
30  
31  
32  
33  
34  
35  
36

37  
38 With respect to program delivery, participants indicated that they were able to access the  
39 sessions via the GoToMeeting platform and did not experience any technical difficulties that  
40 interrupted their training sessions. One difficulty that was reported involved a participant with a  
41 hearing impairment who was unable to hear all of the vignette videos well. This information will help  
42 us to assess for reasons why participants may need additional support in the full-scale trial and will  
43 allow us to make accommodations. In the full-scale trial, we will assess for hearing and any other  
44 impairments that might limit participation, and we will seek appropriate assistance to be able to  
45 provide adaptations to meet participant needs. From a management standpoint, total time for technical  
46  
47  
48  
49  
50  
51  
52  
53  
54  
55  
56  
57  
58  
59  
60

1  
2  
3 support due to access difficulties across the trial period for the two groups was between 1-2 hours.  
4  
5 Participants attended 95% of sessions, and all 10 participants completed all baseline and post-trial  
6  
7 outcome assessments.  
8  
9

10       There were limitations that should be considered in evaluating the results of the SPIN-SSLED  
11 feasibility trial. First, we were provided with a small list of potential participants from our patient  
12 organisation partners, and it is possible that these support group leaders were more motivated or  
13 otherwise more likely to participate and engage than the leaders who will participate in the full-scale  
14 trial. Second, we did not randomise participants to the intervention and to a wait-list control group as  
15 we will do in the planned full-scale trial. Third, we only conducted 2 training groups and only included  
16 a total of 10 participants. The reason for not using a control group and limiting the feasibility trial to 2  
17 groups is that there is a finite number of English- and French-speaking SSc support group leaders, and  
18 we wanted to be able to assess feasibility aspects but maximize the number of participants eligible for  
19 the full-scale trial. It is possible that the pre-selection of potential participants and the lack of the  
20 possibility of randomised assignment to a non-intervention group may have resulted in over-estimation  
21 of the percentage of participants who will enrol in the full-scale trial and the degree to which they will  
22 actively participate. Given the small number of French-speaking leaders available for the full-scale  
23 trial, we did not include a French group in the feasibility trial. However, all measures have been used  
24 successfully previously with French-speaking research participants. Finally, the trial only included  
25 leaders of SSc support groups, and this may limit generalisability to other patient populations, but it  
26 will be useful to inform our planned full-scale trial of the SPIN-SSLED Program.  
27  
28  
29  
30  
31  
32  
33  
34  
35  
36  
37  
38  
39  
40  
41  
42  
43  
44  
45  
46  
47  
48

49       There are no existing training programs for SSc support group leaders, and a systematic review  
50 did not identify any training or education programs that have been demonstrated to be effective for  
51 support group leaders in any medical condition.[31] The planned full-scale SPIN-SSLED trial, which  
52  
53  
54  
55  
56  
57  
58  
59  
60



1  
2  
3 was recently funded by the Canadian Institutes of Health Research, is scheduled to begin in 2019  
4  
5 ([http://webapps.cihr-irsc.gc.ca/decisions/p/project\\_details.html?applId=388187&lang=en](http://webapps.cihr-irsc.gc.ca/decisions/p/project_details.html?applId=388187&lang=en)). It will be a  
6  
7 pragmatic RCT that will test whether providing the SPIN-SSLED Program to leaders of SSc support  
8  
9 groups will improve outcomes compared to leaders assigned to a wait-list control. Pragmatic RCTs  
10  
11 differ from explanatory or mechanistic trials in that they are intended to test the effectiveness of adding  
12  
13 an intervention to routine practice in order to inform practice and policy decisions rather than explain  
14  
15 intervention mechanisms.[59, 60] SSc support group leaders who are enrolled will be randomly  
16  
17 allocated to the training program or a wait-list control, and those allocated to training will be clustered  
18  
19 in training groups where they will interact with each other. To account for clustering in the training  
20  
21 arm, but not the control arm, we will use a partially nested RCT trial design (PN-RCT).[61-63] The  
22  
23 PN-RCT design is a hybrid between a conventional RCT, in which individual participants are  
24  
25 randomised, and a cluster RCT, in which pre-existing clusters (e.g., primary care practices,  
26  
27 classrooms) are randomised to intervention or control arms. In the PN-RCT design, analyses account  
28  
29 for dependence within intervention arm clusters, but treat leaders assigned to the control arm  
30  
31 individually, as in a conventional RCT. Participants will be existing support group leaders or new  
32  
33 leaders referred by Scleroderma Canada (English) or Sclérodermie Québec (French), the Scleroderma  
34  
35 Foundation (USA), Scleroderma & Raynaud's UK, the Scleroderma Association of New South Wales  
36  
37 (Australia), and Scleroderma New Zealand.

38  
39  
40  
41  
42  
43  
44 In sum, the SPIN-SSLED feasibility trial ensured that trial methodology was feasibly  
45  
46 implemented and that the online intervention was user-friendly and acceptable to participants.  
47  
48 Participants provided suggestions for adjustments to content that will be implemented before  
49  
50 undertaking a full-scale RCT of the SPIN-SSLED program to assess effectiveness.  
51  
52  
53  
54  
55  
56  
57  
58  
59  
60

## **AUTHORS CONTRIBUTIONS**

BDT, VLM, GE-B, SP, MS, MH, RWP and members of the SPIN-SSLED Patient Advisory Team were responsible for the study conception and design. BDT, LD, MP, KA, MEC, LT, and SH were responsible for implementation of the trial or acquisition, analysis, and interpretation of trial data. BDT drafted the manuscript. All authors provided a critical review and approved the final manuscript. BDT is the guarantor.

## **ACKNOWLEDGEMENTS**

Not applicable.

## **FUNDING STATEMENT**

Funding from the Scleroderma Society of Ontario and the Canadian Institutes of Health Research (PJT-156429) was used for development of the SPIN-SSLED Program and preliminary research. The trial was funded by the Canadian Initiative for Outcomes in Rheumatology cAre. Dr. Thombs was supported by a Fonds de Recherche Québec - Santé (FRQS) researcher award outside of the present work. Dr. Platt holds the Albert Boehringer I Chair in Pharmacoepidemiology. No sponsor or funder was involved in the study design; in the collection, analysis and interpretation of the data; in the writing of the report; or in the decision to submit the paper for publication.

## **COMPETING INTERESTS STATEMENT**

All authors have completed the ICMJE uniform disclosure form at [www.icmje.org/coi\\_disclosure.pdf](http://www.icmje.org/coi_disclosure.pdf) and declare that they have no competing interests.

## **DATA SHARING STATEMENT**

1  
2  
3  
4  
5  
6  
7  
8  
9  
10  
11  
12  
13  
14  
15  
16  
17  
18  
19  
20  
21  
22  
23  
24  
25  
26  
27  
28  
29  
30  
31  
32  
33  
34  
35  
36  
37  
38  
39  
40  
41  
42  
43  
44  
45  
46  
47  
48  
49  
50  
51  
52  
53  
54  
55  
56  
57  
58  
59  
60

De-identified data extracted and analysed for the present study are available from the corresponding author upon request.

For peer review only

## REFERENCES

1. Kralik D. The quest for ordinariness: transition experienced by midlife women living with chronic illness. *J Adv Nurs* 2002;39:146-154.
2. Karasz A, Ouellette SC. Role strain and psychological well-being in women with systemic lupus erythematosus. *Women Health* 1995;23:41-57.
3. Kole A, Faurisson F. The voice of 12,000 patients: experiences and expectations of rare disease patients on diagnosis and care in Europe. 2009. [http://www.eurordis.org/IMG/pdf/voice\\_12000\\_patients/EURORDISCARE\\_FULLBOOKr.pdf](http://www.eurordis.org/IMG/pdf/voice_12000_patients/EURORDISCARE_FULLBOOKr.pdf). Accessed February 10, 2019.
4. European Organisation for Rare Diseases. Rare diseases: understanding this public health priority. 2005. [http://www.eurordis.org/IMG/pdf/princeps\\_document-EN.pdf](http://www.eurordis.org/IMG/pdf/princeps_document-EN.pdf). Accessed February 10, 2019.
5. Cohen JS, Biesecker BB. Quality of life in rare genetic conditions: a systematic review of the literature. *Am J Med Genet A* 2010;152:1136-56.
6. Huyard C. What, if anything, is specific about having a rare disorder? Patients' judgements on being ill and being rare. *Health Expect* 2009;12:361-70.
7. Nettleton S, Watt I, O'Malley L, et al. Understanding the narratives of people who live with medically unexplained illness. *Patient Educ Couns* 2005;56:205-21.

- 1  
2  
3 8. Van Walsem MR, Howe EI, Iversen K, Frich JC, Andelic N. Unmet needs for healthcare and  
4  
5  
6 social support services in patients with Huntington's disease: a cross-sectional  
7  
8  
9 population-based study. *Orphanet J Rare Dis* 2015;10:124.  
10
- 11 9. Anderson M, Elliott EJ, Zurynski YA. Australian families living with a rare disease:  
12  
13  
14 experiences of diagnosis, health services use and needs for psychosocial support.  
15  
16  
17 *Orphanet J Rare Dis* 2013;8:22.  
18
- 19 10. Dwyer AA, Quinton R, Morin D, Pitteloud N. Identifying the unmet health needs of  
20  
21  
22 patients with congenital hypogonadotropic hypogonadism using a web-based needs  
23  
24  
25 assessment: implications for online interventions and peer-to-peer support. *Orphanet J*  
26  
27  
28 *Rare Dis* 2014;9:83.  
29
- 30 11. Kasparian NA, Rutstein A, Sansom-Daly UM, et al. Through the looking glass: an  
31  
32  
33 exploratory study of the lived experiences and unmet needs of families affected by Von  
34  
35  
36 Hippel-Lindau disease. *Eur J Hum Genet* 2015;23:34-40.  
37
- 38 12. Holtzclaw Williams P. Policy framework for rare disease health disparities. *Policy Polit Nurs*  
39  
40  
41 *Pract* 2011;12:114-118.  
42
- 43 13. Newman S, Steed L, Mulligan K. Self-management interventions for chronic illness. *Lancet*  
44  
45  
46 2004;364:1523-1537.  
47
- 48 14. Davison KP, Pennebaker JW, Dickerson SS. Who talks? The social psychology of illness  
49  
50  
51 support groups. *Am Psychol* 2000;55:205-217.  
52  
53  
54  
55  
56  
57  
58  
59

- 1  
2  
3 15. Kwakkenbos L, Jewett LR, Baron M, et al. The Scleroderma Patient-centered Intervention  
4  
5 Network (SPIN): protocol for a cohort multiple randomised controlled trial (cmRCT)  
6  
7 design to support trials of psychosocial and rehabilitation interventions in a rare disease  
8  
9 context. *BMJ Open* 2013;3:eoo3563.  
10  
11
- 12  
13 16. Reimann A, Bend J, Dembski B. [Patient-centred care in rare diseases. A patient  
14  
15 organisations' perspective]. *Bundesgesundheitsblatt Gesundheitsforschung*  
16  
17 *Gesundheitsschutz* 2007;50:1484-1493.  
18  
19
- 20  
21 17. Gumuchian ST, Delisle VC, Kwakkenbos L, et al. Reasons for attending support groups and  
22  
23 organisational preferences: the European scleroderma support group members survey.  
24  
25 *Disabil Rehabil* 2017;19:1-9.  
26  
27
- 28  
29 18. Delisle VC, Gumuchian ST, Peláez S, et al. Reasons for non-participation in scleroderma  
30  
31 support groups. *Clin Exp Rheumatol* 2016;34:56-62.  
32  
33
- 34  
35 19. Gumuchian ST, Delisle VC, Peláez S, et al. Reasons for not participating in scleroderma  
36  
37 patient support groups: a cross-sectional study. *Arthritis Care Res* 2018;70:275-283.  
38  
39
- 40  
41 20. Delisle VC, Gumuchian ST, El-Baalbaki G, et al. Training and support needs of scleroderma  
42  
43 support group facilitators: the North American Scleroderma Support Group Facilitators  
44  
45 Survey. *Disabil Rehabil* 2018;25:1-6.  
46  
47
- 48  
49 21. Aymé S, Kole A, Groft S. Empowerment of patients: lessons from the rare diseases  
50  
51 community. *Lancet* 2008;371:2048-2051.  
52  
53  
54  
55  
56  
57  
58  
59

- 1  
2  
3  
4 22. Barg FK, Gullatte MM. Cancer support groups: Meeting the needs of African Americans  
5  
6 with cancer. *Semin Oncol Nurs* 2001;17:171-178.  
7  
8  
9 23. Seibold J. Scleroderma. In Harris ED, Budd RC, Firestein GS, et al, editors. *Kelly's Textbook*  
10  
11 of Rheumatology. Philadelphia: *Elsevier*; 2005. pp. 1279-1308.  
12  
13  
14 24. Mayes M. Systemic sclerosis: clinical features. In Klippel JH, Stone JH, Crafford LJ, White  
15  
16 PH, editors. *Primer on the Rheumatic Diseases*. 13<sup>th</sup> ed. New York: Springer and Arthritis  
17  
18 Foundation; 2008: pp. 343-350.  
19  
20  
21 25. Wigley FM, Hummers LK. Clinical features of systemic sclerosis. In: Hochberg MC, Silman,  
22  
23 A.J., Smolen, J.S., Weinblatt ME, Weismann WH, eds. *Rheumatology*. 3rd ed. Philadelphia:  
24  
25 *Mosby*; 2003:1463-1480.  
26  
27  
28  
29 26. Kwakkenbos L, Delisle VC, Fox RS, et al. Psychosocial aspects of scleroderma. *Rheum Dis*  
30  
31 *Clin North Am* 2015;41:519-528.  
32  
33  
34  
35 27. Scleroderma Canada. Find a support group. [www.scleroderma.ca/Support/Find-A-](http://www.scleroderma.ca/Support/Find-A-Support-Group.php)  
36  
37 [Support-Group.php](http://www.scleroderma.ca/Support/Find-A-Support-Group.php). Accessed February 10, 2019.  
38  
39  
40 28. Scleroderma Foundation. Support groups.  
41  
42 [www.scleroderma.org/site/PageServer?pagename=patients\\_supportgroups#.Vbec7RZvdF](http://www.scleroderma.org/site/PageServer?pagename=patients_supportgroups#.Vbec7RZvdFw)  
43  
44 [w](http://www.scleroderma.org/site/PageServer?pagename=patients_supportgroups#.Vbec7RZvdFw). Accessed February 10, 2019.  
45  
46  
47  
48 29. Scleroderma & Raynaud's UK. Find support. [www.sruk.co.uk/find-support/](http://www.sruk.co.uk/find-support/). Accessed  
49  
50 February 10, 2019.  
51  
52  
53  
54  
55  
56  
57  
58  
59  
60

- 1  
2  
3  
4 30. Scleroderma Association of New South Wales. Regional support groups.  
5  
6 www.sclerodermansw.org/regional-support-groups. Accessed February 10, 2019.  
7  
8  
9 31. Delisle VC, Gumuchian ST, Kloda LA, et al. The effect of support group peer facilitator  
10  
11 training programs on peer-facilitator and support group member outcomes: a systematic  
12  
13 review. *BMJ Open* 2016;6:e013325.  
14  
15  
16 32. Zordan R, Butow P, Kirsten L et al. Supporting the supporters: a randomised controlled  
17  
18 trial of interventions to assist the leaders of cancer support groups. *J Community Psychol*  
19  
20 2015;43:261–77.  
21  
22  
23  
24 33. Eldridge SM, Chan CL, Campbell MJ, et al. CONSORT 2010 statement: extension to pilot  
25  
26 and feasibility trials. *BMJ* 2016;355:i5239.  
27  
28  
29  
30 34. Boud D, Feletti G. The challenge of problem-based learning (2<sup>nd</sup> ed). London: Kogan Page; 1997.  
31  
32  
33 35. Duch BJ, Groh SE, Allen DE. Why problem-based learning? A case study of institutional change  
34  
35 in undergraduate education. In Duch BJ, Groh SE, Allen DE, editors. The power of problem-based  
36  
37 learning (pp. 3-11). Sterling, VA: Stylus; 2001.  
38  
39 36. Hmelo-Silver CE. Problem-based learning: What and how do students learn? *Educ Psychol Rev*  
40  
41 2004;16:235-266.  
42  
43  
44 37. Torp L, Sage S. Problems as possibilities: Problem-based learning for K-16 education (2<sup>nd</sup> ed).  
45  
46 Alexandria, VA: Association for Supervision and Curriculum Development; 2002.  
47  
48 38. Hay-Hansson AW, Eldevik S. Training discrete trials teaching skills using videoconference. *Res*  
49  
50 *Autism Spect Disord* 2013;7:1300-1309.  
51  
52  
53 39. Seibert DC, Guthrie JT, Adamo G. Improving learning outcomes: Integration of standardized  
54  
55 patients & telemedicine technology. *Nurs Educ Perspect* 2004;25:232-237.  
56  
57  
58  
59  
60



- 1  
2  
3 40. Xavier K. Clinical supervision and education via videoconference: a feasibility project. *J Telemed*  
4  
5 *Telecare* 2007;13:206-209.  
6  
7  
8 41. Marziali E, Donahue P. Caring for others: internet video-conferencing group intervention for  
9  
10 family caregivers of older adults with neurodegenerative disease. *Gerontologist* 2006;46:398-403.  
11  
12 42. Fisher WW, Luczynski KC, Hood SA, et al. Preliminary findings of a randomised clinical trial of  
13  
14 a virtual training program for applied behavior analysis technicians. *Res Autism Spect Disord*  
15  
16 2014;8:1044-1054.  
17  
18  
19 43. Hommel KA, Gray WN, Hente E, et al. The Telehealth Enhancement of Adherence to Medication  
20  
21 (TEAM) in pediatric IBD trial: Design and methodology. *Contemp Clin Trials* 2015;43:105-113.  
22  
23  
24 44. Williams LK, McCarthy MC, Burke K, Anderson V, Rinehart N. Addressing behavioral impacts  
25  
26 of childhood leukemia: A feasibility pilot randomised controlled trial of a group  
27  
28 videoconferencing parenting intervention. *Eur J Oncol N* 2016;24:61-69.  
29  
30  
31 45. Shoemaker SJ, Wolf MS, Brach C. Development of the Patient Education Materials Assessment  
32  
33 Tool (PEMAT): a new measure of understandability and actionability for print and audiovisual  
34  
35 and patient information. *Patient Educ Couns* 2014;96:395-403.  
36  
37  
38 46. Pal NE, Gumuchian ST, Delisle VC, et al. Development and preliminary validation of the  
39  
40 Scleroderma Support Group Leader Self-efficacy Scale. *J Scleroderma Relat Disord* 2018;3:106-  
41  
42 111.  
43  
44  
45 47. Page BJ, Pietrzak DR, Lewis TF. Development of the group leader self-efficacy instrument.  
46  
47  
48 *J Spec Group Work* 2001; 26:168-84.  
49  
50  
51 48. Zordan RD, Juraskova I, Butow PN, et al. Exploring the impact of training on the  
52  
53 experience of Australian support group leaders: current practices and implications for  
54  
55 research. *Health Expect* 2010;13:427-440.  
56  
57  
58  
59  
60

- 1  
2  
3  
4 49. Butow PN, Ussher J, Kirsten L, et al. Sustaining leaders of cancer support groups: the role,  
5  
6 needs, and difficulties of leaders. *Soc Work Health Care* 2005;42:39-55.  
7  
8  
9 50. Demerouti E, Bakker AB, Vardakou I, Kantas A. The convergent validity of two burnout  
10  
11 instruments: a multitrait-multimethod analysis. *Eur J Psychol Assess* 2002;18:296-307.  
12  
13  
14 51. Halbesleben JRB, Demerouti E. The construct validity of an alternative measure of burnout:  
15  
16 Investigating the English translation of the Oldenburg Burnout Inventory. *Work Stress*  
17  
18 2005;19:208-220.  
19  
20  
21 52. Reis D, Xanthopoulou D, Tsaousis I. Measuring job and academic burnout with the  
22  
23 Oldenburg Burnout Inventory (OLBI): factorial invariance across countries and samples.  
24  
25  
26 *Burn Res* 2015;2:8-18.  
27  
28  
29 53. Kroenke K, Strine TW, Spitzer RL, et al. The PHQ-8 as a measure of current depression in  
30  
31 the general population. *J Affect Disord* 2009;114:163-173.  
32  
33  
34  
35 54. Milette K, Hudson M, Baron M, et al. Comparison of the PHQ-9 and CES-D depression  
36  
37 scales in systemic sclerosis: internal consistency reliability, convergent validity and clinical  
38  
39 correlates. *Rheumatology* 2010;49:789-796.  
40  
41  
42  
43 55. Kwakkenbos L, Thombs BD, Khanna D, et al. Performance of the Patient-Reported Outcomes  
44  
45 Measurement Information System-29 (PROMIS-29) in scleroderma: a Scleroderma Patient-  
46  
47 centered Intervention Network (SPIN) Cohort Study. *Rheumatology* 2017;56:1302-1311.  
48  
49  
50 56. Larsen DL, Attkisson CC, Hargreaves WA, Nguyen TD. Assessment of client/patient satisfaction:  
51  
52 development of a general scale. *Eval Program Plann* 1979;2:197-207.  
53  
54  
55  
56  
57  
58  
59  
60

- 1  
2  
3 57. Kelly PJ, Kyngdon F, Ingram I, et al. The Client Satisfaction Questionnaire-8: Psychometric  
4 properties in a cross-sectional survey of people attending residential substance abuse treatment.  
5  
6 *Drug Alcohol Rev* 2018;37:79-86.  
7  
8  
9  
10 58. Cohen, J. *Statistical Power Analysis for the Behavioral Sciences, 2<sup>nd</sup> Edition*. Hillsdale, N.J.:  
11 Lawrence Erlbaum; 1988.  
12  
13  
14 59. Zwarenstein M, Treweek S, Gagnier JJ, et al. Improving the reporting of pragmatic trials: an  
15 extension of the CONSORT statement. *BMJ* 2008;337:a2390.  
16  
17  
18  
19 60. Roland M, Torgerson DJ. Understanding controlled trials: What are pragmatic trials? *BMJ*  
20 1998;316:285.  
21  
22  
23  
24 61. Lohr S, Schochet PZ, Sanders E. Partially nested randomised controlled trials in educational  
25 research: a guide to design and analysis. NCER 2014-2000. Washington, DC: National Center for  
26 Education Research; 2014.  
27  
28  
29  
30 62. Bauer DJ, Sterba SK, Hallfors DD. Evaluating group-based interventions when control  
31 participants are ungrouped. *Multivar Behav Res* 2008;43:210-236.  
32  
33  
34  
35 63. Schweig JD, Pane JF. Intention-to-treat analysis in partially nested randomised controlled trials  
36 with real-world complexity. *Int J of Res Meth Educ* 2016;39:268-286.  
37  
38  
39  
40  
41  
42  
43  
44  
45  
46  
47  
48  
49  
50  
51  
52  
53  
54  
55  
56  
57  
58  
59  
60

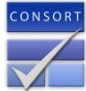

## CONSORT 2010 checklist of information to include when reporting a pilot or feasibility trial\*

| Section/Topic                    | Item No | Checklist item                                                                                                                                                                              | Reported on page No |
|----------------------------------|---------|---------------------------------------------------------------------------------------------------------------------------------------------------------------------------------------------|---------------------|
| <b>Title and abstract</b>        |         |                                                                                                                                                                                             |                     |
|                                  | 1a      | Identification as a pilot or feasibility randomised trial in the title                                                                                                                      | 1                   |
|                                  | 1b      | Structured summary of pilot trial design, methods, results, and conclusions (for specific guidance see CONSORT abstract extension for pilot trials)                                         | 3-4                 |
| <b>Introduction</b>              |         |                                                                                                                                                                                             |                     |
| Background and objectives        | 2a      | Scientific background and explanation of rationale for future definitive trial, and reasons for randomised pilot trial                                                                      | 6                   |
|                                  | 2b      | Specific objectives or research questions for pilot trial                                                                                                                                   | 7                   |
| <b>Methods</b>                   |         |                                                                                                                                                                                             |                     |
| Trial design                     | 3a      | Description of pilot trial design (such as parallel, factorial) including allocation ratio                                                                                                  | 7                   |
|                                  | 3b      | Important changes to methods after pilot trial commencement (such as eligibility criteria), with reasons                                                                                    | 7                   |
| Participants                     | 4a      | Eligibility criteria for participants                                                                                                                                                       | 7-8                 |
|                                  | 4b      | Settings and locations where the data were collected                                                                                                                                        | 8                   |
|                                  | 4c      | How participants were identified and consented                                                                                                                                              | 8                   |
| Interventions                    | 5       | The interventions for each group with sufficient details to allow replication, including how and when they were actually administered                                                       | 9-10                |
| Outcomes                         | 6a      | Completely defined prespecified assessments or measurements to address each pilot trial objective specified in 2b, including how and when they were assessed                                | 11-13               |
|                                  | 6b      | Any changes to pilot trial assessments or measurements after the pilot trial commenced, with reasons                                                                                        | 7                   |
|                                  | 6c      | If applicable, prespecified criteria used to judge whether, or how, to proceed with future definitive trial                                                                                 | NA                  |
| Sample size                      | 7a      | Rationale for numbers in the pilot trial                                                                                                                                                    | 13                  |
|                                  | 7b      | When applicable, explanation of any interim analyses and stopping guidelines                                                                                                                | NA                  |
| Randomisation:                   |         |                                                                                                                                                                                             |                     |
| Sequence generation              | 8a      | Method used to generate the random allocation sequence                                                                                                                                      | NA                  |
|                                  | 8b      | Type of randomisation(s); details of any restriction (such as blocking and block size)                                                                                                      | NA                  |
| Allocation concealment mechanism | 9       | Mechanism used to implement the random allocation sequence (such as sequentially numbered containers), describing any steps taken to conceal the sequence until interventions were assigned | NA                  |

|                                                      |     |                                                                                                                                                                                       |            |
|------------------------------------------------------|-----|---------------------------------------------------------------------------------------------------------------------------------------------------------------------------------------|------------|
| Implementation                                       | 10  | Who generated the random allocation sequence, who enrolled participants, and who assigned participants to interventions                                                               | NA         |
| Blinding                                             | 11a | If done, who was blinded after assignment to interventions (for example, participants, care providers, those assessing outcomes) and how                                              | NA         |
|                                                      | 11b | If relevant, description of the similarity of interventions                                                                                                                           | NA         |
| Statistical methods                                  | 12  | Methods used to address each pilot trial objective whether qualitative or quantitative                                                                                                | 13-14      |
| <b>Results</b>                                       |     |                                                                                                                                                                                       |            |
| Participant flow (a diagram is strongly recommended) | 13a | For each group, the numbers of participants who were approached and/or assessed for eligibility, randomly assigned, received intended treatment, and were assessed for each objective | 14-15      |
|                                                      | 13b | For each group, losses and exclusions after randomisation, together with reasons                                                                                                      | 14-15      |
| Recruitment                                          | 14a | Dates defining the periods of recruitment and follow-up                                                                                                                               | 14         |
|                                                      | 14b | Why the pilot trial ended or was stopped                                                                                                                                              | NA         |
| Baseline data                                        | 15  | A table showing baseline demographic and clinical characteristics for each group                                                                                                      | 15         |
| Numbers analysed                                     | 16  | For each objective, number of participants (denominator) included in each analysis. If relevant, these numbers should be by randomised group                                          | All tables |
| Outcomes and estimation                              | 17  | For each objective, results including expressions of uncertainty (such as 95% confidence interval) for any estimates. If relevant, these results should be by randomised group        | 21-22      |
| Ancillary analyses                                   | 18  | Results of any other analyses performed that could be used to inform the future definitive trial                                                                                      | NA         |
| Harms                                                | 19  | All important harms or unintended effects in each group (for specific guidance see CONSORT for harms)                                                                                 | 16         |
|                                                      | 19a | If relevant, other important unintended consequences                                                                                                                                  | NA         |
| <b>Discussion</b>                                    |     |                                                                                                                                                                                       |            |
| Limitations                                          | 20  | Pilot trial limitations, addressing sources of potential bias and remaining uncertainty about feasibility                                                                             | 25         |
| Generalisability                                     | 21  | Generalisability (applicability) of pilot trial methods and findings to future definitive trial and other studies                                                                     | 25         |
| Interpretation                                       | 22  | Interpretation consistent with pilot trial objectives and findings, balancing potential benefits and harms, and considering other relevant evidence                                   | 26         |
|                                                      | 22a | Implications for progression from pilot to future definitive trial, including any proposed amendments                                                                                 | 26         |
| <b>Other information</b>                             |     |                                                                                                                                                                                       |            |
| Registration                                         | 23  | Registration number for pilot trial and name of trial registry                                                                                                                        | 4          |
| Protocol                                             | 24  | Where the pilot trial protocol can be accessed, if available                                                                                                                          | NA         |
| Funding                                              | 25  | Sources of funding and other support (such as supply of drugs), role of funders                                                                                                       | 27         |
|                                                      | 26  | Ethical approval or approval by research review committee, confirmed with reference number                                                                                            | 9          |

1 Citation: Eldridge SM, Chan CL, Campbell MJ, Bond CM, Hopewell S, Thabane L, et al. CONSORT 2010 statement: extension to randomised pilot and feasibility trials. BMJ. 2016;355.

2 \*We strongly recommend reading this statement in conjunction with the CONSORT 2010, extension to randomised pilot and feasibility trials, Explanation and Elaboration for important  
3 clarifications on all the items. If relevant, we also recommend reading CONSORT extensions for cluster randomised trials, non-inferiority and equivalence trials, non-pharmacological  
4 treatments, herbal interventions, and pragmatic trials. Additional extensions are forthcoming: for those and for up to date references relevant to this checklist, see [www.consort-statement.org](http://www.consort-statement.org).  
5  
6  
7  
8  
9  
10  
11  
12  
13  
14  
15  
16  
17  
18  
19  
20  
21  
22  
23  
24  
25  
26  
27  
28  
29  
30  
31  
32  
33  
34  
35  
36  
37  
38  
39  
40  
41  
42

For peer review only
